# Supplementary material for: Genomic evidence of adaptive evolution in the reptilian SOCS gene family
Source: PeerJ. 2021 Jun 24;9:e11677. doi: 10.7717/peerj.11677 (PMC8236234; doi:10.7717/peerj.11677)
Supplement: Supplemental Information 2 [file peerj-09-11677-s002.xlsx]

## Sheet: Sheet1
Accession No.	Scientific Name	Taxon	Hedgehog gene
XM_026725327.1	Pseudonaja textilis	CISH	ATGCTCTTTCCCGGGTCTTGGCGTGACATGATCCTCTGCGTTCAAGGAACCTATCCTTTGGTATCAGAGGAAAAACTCCGGAGGCGACCTGTAGAAGGCCTTGCAGTGAATGTGTCAGAACTGGTCATGCAGCCTCTGTCAGTCACATCCTTCCAAGAACAGACTGCCCCTCCCTTGGTAATGCCCAAGCTTGAAAGCAACTCCCCTCAAACCAGAGACCCAGAGGAGGATCTGCTATGCATTGCCAGAACGTTTTCATTTCTGAGAGAATCTGGCTGGTATTGGGGTTCTATTACAGCCAATGAAGCCAAGCAGCAGCTCCAGAAGAGGCCAGAGGGGACTTTTCTGGTACGGGACAGTGCTCATCCCAGCTACCTGTTCACACTATCCGTAAAGACC…
XM_026673269.1	Notechis scutatus	CISH	ATGCTCTTTCCCGGGTCTTGGCGTGACATGATCCTCTGCATTCAAGGAACCTATCCTTTGGTATCAGAGGAAAAACTCCGGAGGCGACCTGTAGAAGGCCTTGCAGTGAATGTGTCAGAACTGGTCATGCAGCCTCTGTCAGTCACATCCTTCCAAGAACAGCCTGCCCCTCCCTTGGTAATGCCCAGGCTTGAAAGCAACTCCCCTCAAACCAGAGACCCAGAGGAGGATCTGCTATGCATTGCCAGAACGTTTTCATTTCTGAGAGAATCTGGCTGGTATTGGGGTTCTATTACAGCCAATGAAGCCAAGCAACAGCTCCAGAAGAGGCCAGAGGGGACTTTTCTGGTACGGGACAGTGCTCATCCCAGCTACCTGTTCACACTATCCGTAAAGACC…
XM_024205690.2	Terrapene mexicana triunguis	CISH	ATGCGTTTTTCTTGGTCCTGGAGTGACATGATCATCTGTGTTCAGGGACCCCATCCTTTGCTGGCAGAGGAGAAGTTCAGGAGACAGTCGCTCAGAGGCATTGCAGTGGATTTGTCCGAGCAGATCATGCAACCTCGCTCCGTTACGGTCTTCCAGGGAGAATCTGCTCCTGCCTTCATGGCACCTGCTCCTGAGAATAACCTGCCTCGGATGCGAGATCCTGAAGAAGACCTGCTATGCATTGCAAAAACCTTCTCCTATCTGCGAGAATCTGGCTGGTATTGGGGGTCTATCACAGCCAGTGAGGCCAAGCAGCATCTTCAGAAGATGCCTGAGGGTACCTTCCTGGTACGGGACAGTACCCACCCCAGCTACCTGTTCACACTCTCCGTCAAGACC…
XM_020788761.1	Pogona vitticeps	CISH	ATGTTCTTTCATTGGTCCTGGAGGGACATGATCCTCTGCGTTCAAGGATCTCATCCTTTGCTGGCAGAGGAAAAATTCCAGAGACTGTCGTTTGGGGACCTTGCAGTGAATGTGTCAGAGACGGTCATGCAACCTCTAGCAGTTCCACCTTTCCAAGAACAGTCTGCTCCTCCCTCTGTGGCAGCCACACTTGAGAGCAACCCACCTCAAGCTCGAGATCCAGAAGAGGATCTGCTCTGCATTGCCCAGACATTTTCTTATCTGCGAGAATCTGGCTGGTACTGGGGCTCTATTACAGCCAGTGAAGCCAAGCAGCAGCTCCAAAAGACACCTGAAGGAACTTTCCTGGTACGAGACAGCACTCACCCCAGTTACCTATTCACACTCTCAGTGAAGACC…
XM_019547478.1	Crocodylus porosu	CISH	ATGCTTTTTCCTTGGTTCAGGAGTGACATGATCCTCTGTGTTCAGGGACCTCATCCTTTGCTGGCAGAGGAGAAGAGCAGGAGGCTGTCTCTCAGAGGCATTGCAGTGGATTTGTCAGAGCCAGTCATGCAACCTCTCTCCGTCACAGCCTTCCAAGAAGAGTCTGCCCCTGCTTTTGTGGCACCTGCTCTGGAGATCAACTCGCCTCGGATGCGAGACCCTGAGGAAGATCTGAAGTGCATTGCCAAAACCTTCTCTTACCTGAGGGAATCTGGCTGGTACTGGGGGTCTATCACTGCCAGTGAGGCCAAGCAGCACCTCCAGAAGATGCCTGAGGGCACGTTCCTGGTACGAGACAGTACCCACCCTAGCTACCTGTTCACGCTCTCTGTCAAGACC…
XM_019505177.1	Gavialis gangeticus	CISH	ATGCTTTTTCCTTGGTTCAGGAGTGACATGATCCTCTGTGTTCAGGGACCTCATACTTTGCTGGCAGAGGAGAAGAGCAGGAGGCTGTCCCTCAGAGGCATTGCAGTGGATTTGTCAGAGCCAGTCATGCAACCTCTCTCCGTCACAGCCTTCCAAGAAGAGTCTGCCCCTGCCTTTGTGGCACCTGCTCTGGAGATCAACTTGCCTCGGATGCGAGACCCTGAGGAAGATCTGATGTGTATTGCCAAAACCTTCTCGTACCTGAGGGAATCTGGCTGGTACTGGGGGTCTATCACTGCCAGTGAAGCCAAGCAGCACCTCCAGAAGATGCCTGAGGGCACGTTCCTGGTACGAGACAGTACCCACCCTAGCTACCTGTTCACGCTCTCTGTCAAGACC…
XM_015817181.1	Protobothrops mucrosquamatus	CISH	ATGCTCTTTCCTGGGTCCTGGAGTGACATGATCCTCTGCGTTCAAGGATCCTATCCTTTGGTATCAGAGGAGAAACTTCGGAGGCTGCCAGTTGAAGGCCTTGCAGTGAATGTGTCAGAACAGATGATGCAGCCTCTATCAGTCACATCCTTCCAAGAACAGTCCGCCCCTCCCCTGGCAATGCCCAGGCTTGAAAGCAACTCACCTCAAACACGAGACCCAGAGGAGGATCTGCTATGCATTGCCAGAACATTTTCATTTCTGCGAGAATCTGGCTGGTATTGGGGTTCCATTACAGCCAATGAAGCCAAGCAGCAGCTCCAGAAGATGCCGGAGGGGACTTTTCTGGTACGGGACAGTGCTCATCCCAGCTACTTGTTCACACTATCCGTAAAGACC…
XM_015427198.1	Gekko japonicus	CISH	ATGCTCTTTCCTTGGTCCTGGAGTGACATGATCCTCTGTGTTCAGGGACCCCATCCTTTGCTGGCAGAGGAGAAAATCAGGAGACTATCGCTTGGGGCTCTTGCTGTGAATGTGTCAGAGCAAGTAATGCAGCCTCTGTCAGTCACACCCTTCCAAGAAGAGTCCGTTCCTGCCTTTGTGGCACCCACGCTAGAGAGCAATCCGCCTCAGCCACGAGATCCAGAAGAGGATCTGTTGTGCATTGCAAAGACCTTTTCATATTTGCGAGAATCTGGCTGGTATTGGGGCTCTATCACAGCCAGTGAAGCCAAACAGCAGCTCCAGAAGATGCCTGAAGGCACCTTCCTGGTGCGGGACAGCACTCATCCAAGCTACTTGTTCACACTGTCAGTGAAAACC…
XM_014071913.1	Thamnophis_sirtalis	CISH	ATGCTCTTTCCTGAGTCTTGGAGTGACATGATCCTCTGCGTTCAAGGATCCTATCCTTTGGTCTCAGAGGAGAAACTCCGAAGGCTACCCATTGAAGGCCTTGCAGTGAATGTGTCAGAACAGGTCATGCAGCCTCTATCAGTCACATCCTTCCAAGAGCAGTCTGCCCCTCCCTTGGTAATGCCCAGACTTGAAACCAACTCACCTCAAACACGAGACCCAGAGGAGGATCTGCTATGCATTGCCAGAACGTTTTCATTTCTGAGAGAATCTGGCTGGTATTGGGGTTCTATTACAGCCAATGAAGCCAAGCAGCAACTCCAGAAGATGCCAGAGGGGACTTTTCTGGTACGGGACAGTGCTCATCCCAGCTACCTGTTCACGCTATCCGTAAAGACC…
XM_007430740.2	Python bivittatus	CISH	ATGCTCTTTCCTTGGTCCTGGAGTGACATGATCCTCTGCGTTCCGGGATCCTATCCTTTGCTAGCAGAGGAAAAGCTCAGGAGGCTATCGGTTGAAGGCCTTGCAGTGAATGTGTCAGAGCAGGTCATGCAGCCTTTGACAGTCACATCCTTCCAAGAACAAGCCGCCCCTCCCTCGGTAATGCCCAGGCTTGAAAGCAACCCACCGCAGACACGAGACCCAGAGGAGGATCTGCTGTGCATTGCCAGAACATTTTCGTTCCTGCGAGAATCTGGCTGGTATTGGGGTTCTATTACAGCCAGTGAAGCCAAGCAGCAGCTCCAGAAGATGCCAGAGGGGACTTTTCTGGTGCGGGACAGTGCTCACCCCAGCTACCTGTTCACACTGTCAGTCAAGACC…
XM_007061851.2	Chelonia mydas	CISH	ATGCGTTTTTCCTGGTCCTGGAGTGACATGATCCTCTGTGTTCAGGGACCCCATCCTTTGCTCGCAGAGGAGAAGATCAGGAGACAGTCGCTCAGAGGCATTGCAGTGGATTTGTCAGAGCAGATCATGCAACCTCGCTCCGTTACGGTCTTCCAAGGAGAATCTGCTCCTGCCTTCATGGCACCTGCTCCTGAGAATAACCTGCCTCAGATGCGAGATCCTGAAGAAGACCTGCTATGCATTGCAAAAACCTTCTCCTACCTGCGAGAATCTGGCTGGTATTGGGGATCTATCACAGCCAGCGAGGCCAAGCAGCATCTTCAGAAGATGCCTGAGGGTACCTTCCTGGTACGGGACAGCACCCACCCCAGCTACCTGTTCACGCTCTCTGTCAAGACC…
XM_014600121.2	Alligator mississippiensis	CISH	ATGCTTTTTCCTTGGTTCAGGAGTGACATGATCCTCTGTGTTCAGGGACCTCATCCTTTGCTGGCAGAGGAGAAGAGCAGGAGACTCTCTCTCAGAGGCATTGCAGCAGATTTGTCAGAGCCAGTCATGCAACCTCTCTCTGTCACAGCCTTCCAAGAAGAGTCTGCCCCTGCTTTTGTGGCACCTGCTCTGGAGATCAACTCGCCTCGGATGCGAGACCCTGAGGAGGATCTGATGTGCATTGCCAAAACCTTCTCTTACCTGCGGGAATCTGGCTGGTACTGGGGGTCTATCACTGCCAGTGAGGCCAAGCAGCACCTCCAGAAGATGCCTGAGGGCACGTTCCTGGTACGAGACAGTACCCACCCTAGCTACCTGTTCACGCTCTCTGTCAAGACC…
XM_014520025.1	Alligator sinensis	CISH	ATGCTTTTTCCTTGGTTCAGGAGTGACATGATCCTCTGTGTTCAGGGACCTCATCCTTTGCTGGCAGAGGAGAAGAGCAGGAGACTCTCTCTCAGAGGCATTGCAGCAGATTTGTCAGAGCCAGTCATGCAACCTCTCTCTGTCACAGCCTTCCAAGAAGAGTCTGCCCCTGCTTTTGTGGCACCTGCTCTGGAGATCAACTCGCCTCGGATGCGAGACCCTGAGGAGGATCTGATGTGCATTGCCAAAACATTCTCTTACCTGCGGGAATCTGGCTGGTACTGGGGGTCTATCACTGCCAGTGAGGCCAAGCAACACCTCCAGAAGATGCCTGAGGGCACGTTCCTGGTACGAGACAGTACCCACCCTAGCTACCTGTTCACGCTCTCTGTCAAGACC…
XM_005285291.3	Chrysemys picta bellii	CISH	ATGCGTTTTTCTTGGTCCTGGAGTGACATGATCATCTGTGTTCAGGGACCCCATCCTTTGCTGGCAGAGGAGAAGTTCAGGAGACAGTCGCTCAGAGGCATTGCAGTGGATTTGTCCGAGCAGATCATGCAACCTCGCTCCGTTACGGTCTTCCAGGGAGAATCTGCTCCTGCCTTCATGGCACCTGCTCCTGAGAATAACCTGCCTCGGATGCGAGATCCTGAAGAAGACCTGCTATGCATTGCAAAAACCTTCTCCTATCTGCGAGAATCCGGCTGGTATTGGGGGTCTATCACAGCTAGTGAGGCCAAGCAGCATCTTCAGAAGATGCCTGAGGGTACCTTCCTGGTACGGGACAGTACCCACCCCAGCTACCTGTTCACACTCTCCGTCAAGACC…
XM_003217562.3	Anolis carolinensis	CISH	ATGCTCTTTCCTTGGTCCTGGAGGGACATGATCCTTTGTGTTCAAGGATCCCATCCTTTGCTGGCAGAGGAGAAGATCAGGAGGCGGTCGCTTGGGGGCCTTACAGTGAATGTGTCAGAGCAGGTCATGCAGCCTCTTCCAGTTGTGCCCTTCCAAGATGAAGCTGCTCCTCCCTCAGTGGCACCCACACTTGAGAGCAAGCCACTTCAGGCACGAGACCCAGAAGAAGACCTCCTCTGCATTGCTAAAACATTTTCATACCTGCGTGAATCTGGCTGGTACTGGGGCTCTATCACAGCCAGTGAAGCTAAGCAGCAGCTCCAAAAGACACCTGAGGGCACTTTCTTGGTACGGGACAGCACCCACCCCAGCTACCTATTCACCCTTTCAGTCAAGACC…
PKMU01006179.1	Chelonoidis_abingdonii	CISH	ATGCGTTTTTCTTGGTCCTGGAGTGACATGATCATCTGTGTTCAGGGACCTCATCCTTTGCTGGCGGAGGAGAAGATCAGGAGACAGTCGCTCAGAGGCATTGCAGTGGATTTGTCCGAGCAGATCATGCAACCTCGCTCCGTTATGGTCTTCCAGGGAGAATCTGCTCCTGCCTTCATGGCACCTGCTCCTGAGAATAACCTGCCTCGGATGCGAGATCCTGAAGAAGACTTGCTATGCATTGCAAAAACCTTCTCCTATCTGCGAGAATCCGGCTGGTATTGGGGGTCTATCACAGCCAGTGAGGCCAAGCAGCATCTTCAGAAGATGCCTGAGGGTACCTTCCTGGTACGGGACAGCACACACCCCAGCTACCTGTTCACACTTTCCGTCAAGACC…
LVCR01017478.1	Crotalus_horridus	CISH	ATGCTTTTTCCTGGGTCCTGGAGTGACATGATCCTCTGCGTTCAAGGATCCTATCCTTTGGTATCAGAGGAGAAACTCCGGAGACTGCCAGTTGAAGGCCTTGCAGTGAATGTGTCAGAAGAGATGATGCAGCCTCTATCAGTCACATCCTTCCAAGAACAGTCCGCCCCTCCCTTGGTAATGCCCAGGCTTGAAAGCAACTCACCTCAAACACGAGACCCAGAGGAGGATCTGCTATGCATTGCCAGAACATTTTCATTTCTGCGAGAATCTGGCTGGTATTGGGGTTCCATTACAGCCAATGAAGCCAAGCAGCAGCTCCAGAAGATGCCGGAGGGGACTTTTCTGGTACGGGACAGTGCTCATCCCAGCTATCTGTTCACACTATCCGTAAAGACC…
JPMF01057987.1+JPMF01273862.1+JPMF01001869.1	Crotalus_pyrrhus	CISH	ATGCTTTTTCCTGGGTCCTGGAGTGACATGATCCTCTGCGTTCAAGGATCCTATCCTTTGGTATCAGAGGAGAAACTCCGGAGACTGCCAGTTGAAGGCCTTGCAGTGAATGTGTCAGAACAGATGATGCAGCCTCTATCAGTCACATCCTTCCAAGAACAATCCGCCCCTCCCTTGGTAATGCCCAGGCTTGAAAGCAACTCACCTCAAACACGAGACCCAGAGGAGGATCTGCTATGCATTGCCAGAACATTTTCATTTCTGCGAGAATCTGGCTGGTATTGGGGTTCCATTACAGCCAATGAAGCCAAGCAGCAGCTCCAGAAGATGCCGGAGGGGACTTTTCTGGTACGGGACAGTGCTCATCCCAGCTATCTGTTCACATTATCCGTAAAGACC…
PDHV01002767.1	Crotalus_viridis	CISH	ATGCTTTTTCCTGGGTCCTGGAGTGACATGATCCTCTGCGTTCAAGGATCCTATCCTTTGGTATCAGAGGAGAAACTCCGGAGACTGCCAGTTGAAGGCCTTGCAGTGAATGTGTCAGAAGAGATGATGCAGCCTCTATCAGTCACATCCGTCCAAGAACAGTCCGCCCCTCCCTTGGTAATGCCCAGGCTTGAAAGCAACTCACCTCAAACACGAGACCCAGAGGAGGATCTGCTATGCATTGCCAGAACATTTTCATTTCTGCGAGAATCTGGCTGGTATTGGGGTTCCATTACAGCCAATGAAGCCAAGCAGCAGCTCCAGAAGATGCCGGAGGGGACTTTTCTGGTACGGGACAGTGCTCATCCCAGCTATCTGTTCACATTATCCGTAAAGACC…
RQSS01143405.1	Cuora_mccordi	CISH	ATGCGTTTTTCTTTGTCCTGGAGTGACATGATCATCTGTGTTCAGGGACCCCATCCTTTGCTGGCGGAGGAGAAGATCAGGAGACAGTCGCTCAGAGGCATTGCAGTGGATTTGTCCGAGCAGATCATGCAACCTCGCTCCGTTATGGTCTTCCAGGGAGAATTTGCTCCTGCCTTCATGGCACCTGCTCCTGAGAATAACCTGCCTCGGATGCGAGATCCTGAAGAAGACCTGCTATGCATTGCAAAAACCTTCTCCTATCTGCGAGAACCAGGCTGGTATTGGGGGTCTATCACAGCCAGTGAGGCCAAGCAGCATCTTCAGAAGATGCCTGAGGGTACCTTCCTGGTACGGGACAGCACCCACCCCAGCTACCTGTTCACACTCTCCGTCAAGACC…
PPEB01003722.1	Gopherus_agassizii	CISH	ATGCGTTTTTCTTGGTCCTGGAGTGACATGATCATCTGTGTTCAGGGACCCCATCCTTTGCTGGCAGAGGAGAAGATCAGGAGACAGTCGCTCAGAGGCATTGCAGTGGATTTGTCCGAGCAGATCATGCAACCTCGCTCTGTTATGGTCTTCCAGGGAGAATCTGCTCCTGCCTTCATGGTACCTGCTCCTGAGAATAACCTGCCTCGGATGCGAGATCCTGAAGAAGACTTGCTATGCATTGCAAAAACCTTCTCCTATCTGCGAGAATCCGGCTGGTATTGGGGGTCTATCACAGCCAGTGAGGCCAAGCAGCATCTTCAGAAGATGCCTGAGGGTACCTTCCTGGTACGGGACAGCACCCACCCCAGCTACCTGTTCACACTCTCCGTCAAGACC…
RSAE01326347.1+RSAE01351169.1	Hydrophis_cyanocinctus	CISH	ATGCTCTTTCCCGGGTCTTGGCGTGACATGATCCTCTGCGTTCAAGGAACCTATCCTTTGGTATCAGAGGAAAAACTCCAGAGGCGACCTGTAGAAGGCCTTGCAGTGAATATGTCAAAACTGGTCATGCAGCCTCTGTCAGTCACATCCTTCCAAGAACAGCCTGCCCCTCCCTTGGTAATGCCCAGGCTTGAAAGCAACTCCCCTCAAACCAGAGACCCAGAGGAGGATCTGCTATGCATTGCCAGAACGTTTTCATTTCTGAGAGAATCTGGCTGGTATTGGGGTTCCATTACAGCCAATGAAGCCAAGCAGCAGCTCCAGAAGAGGCCAGAGGGGACTTTTCTGGTACGGGACAGTGCTCATCCCAGCTACCTGTTCACACTATCCGTAAAGACC…
RSAD01226512.1	Hydrophis_hardwickii	CISH	ATGCTCTTTCCCGGGTCTTGGCGTGACATGATCCTCTGCGTTCAAGGAACCTATCCTTTGGTATCAGAGGAAAAACTCCAGAGGCGACCTGTAGAAGGCCTTGCAGTGAATATGTCAAAACTGGTCATGCAGCCTCTGTCAGTCACATCCTTCCAAGAACAGCCTGCCCCTCCCTTGGTAATGCCCAGGCTTGAAAGCAACTCCCCTCAAACCAGAGACCCAGAGGAGGATCTGCTATGCATTGCCAGAACGTTTTCATTTCTGAGAGAATCTGGCTGGTATTGGGGTTCCATTACAGCCAATGAAGCCAAGCAGCAGCTCCAGAAGAGGCCAGAGGGGACTTTTCTGGTACGGGACAGTGCTCATCCCAGCTACCTGTTCACACTATCCGTAAAGACC…
MDXI01020663.1	Malaclemys_terrapin	CISH	ATGCGTTTTTCTTGGTCCTGGAGTGACATGATCATCTGTGTTCAGGGACCCCATCCTTTGCTGGCAGAGGAGAAGTTCAGGAGACAGTCGCTCAGAGGCATTGCAGTGGATTTGTCCGAGCAGATCATGCAACCTCGCTCCGTTACGGTCTTCCAGGGAGAATCTGCTCCTGCCTTCATGGCACCTGCTCCTGAGAATAACCTGCCTCGGATGCGAGATCCTGAAGAAGACCTGCTATGCATTGCAAAAACCTTCTCCTATCTGCGAGAATCAGGCTGGTATTGGGGGTCTATCACAGCTAGTGAGGCCAAGCAGCATCTTCAGAAGATGCCTGAGGGTACCTTCCTGGTACGGGACAGTACCCACCCCAGCTACCTGTTCACACTCTCCGTCAAGACC…
AZIM01000562.1	Ophiophagus_hannah	CISH	ATGCTCTTTCACGGGTCTTGGAGTGACATGATCCTCTGCGTTCAAGGGTCCTATCCTTTGGTATCAGAGGAGAAACTCCGGAGACTACCTGTTGAAGGCCTTGCAGTGAATGTGTCAGAACTGGTCATGCAGCCTCTGTCAGTCACATCCTTCCAAGAACAGCCTGCCCCTCCCTTGGTAATGCCCAGGCTTGAGAGCAACTCCCCTCAAACACGAGACCCAGAGGAGGATCTGCTATGCATTGCCAGAACGTTTTCATTTCTGAGAGAATCTGGCTGGTATTGGGGTTCTATTACAGCCAATGAAGCCAAGCAGCAGCTCCAGAAGAGGCCAGAGGGGACTTTTCTGGTACGGGACAGTGCTCATCCCAGCTACCTGTTCACACTATCCGTAAAGACC…
JTLQ01073053.1+JTLQ01222026.1	Pantherophis_guttatus	CISH	ATGCTCTTTCCTGAATCTTGGAGTGACATGATCCTCTGCGTTCAAGGATCCTATCCTTTGGTATCAGAGGAGAAACTCCGGAGGCTACCTGTTGAAGGCCTTGCAGTGAATGTGTCAGAACAGGTCATGCAGCCTCTCTCAGTCACGTCCTTCCAAGAACAGTCTGCCCCTCCCTTGGTAATGCCCAGACTTGAAAGCAACTCACCTCAAACACGAGACCCAGAGGAAGATCTGCTATGCATTGCCAGAACATTTTCATTTCTGAGAGAATCTGGCTGGTATTGGGGTTCTATTACAGCCAATGAAGCCAAGCAGCAGCTCCAGAAGATGCCAGAGGGGACTTTTCTGGTACGGGACAGTGCTCATCCCAGCTACCTGTTCACACTATCCGTAAAGACC…
QXTE01000264.1	Platysternon_megacephalum	CISH	ATGCGTTTTTCTTGGTCCTGGAGTGACATGATCATCTGTGTTCAGGGACCCCATCCTTTGCTGGCAGAGGAGAAGATCAGGAGACAGTCACTCAGAGGCATTGCAGTGGATTTGTCCGAGCAAATCATGCAACCTCGCTCCGTTACGGTCTTCCAGGGAGAATCTGCTCCTGCCTTCATGGCACCTGCTCCTGAGAATAACCTGCCTCGGATGCGAGATCCTGAAGAAGACCTGCTATGCATTGCAAAAACCTTCTCCTATCTGCGAGAATCCGGCTGGTATTGGGGGTCTATCACAGCCAGTGAGGCCAAGCAGCATCTTCAGAAGATGCCTGAGGGTACCTTCCTGGTACGGGACAGCACCCACCCCAGCTACCTGTTCACACTCTCCGTCAAGACC…
CM014744.1	Podarcis_muralis	CISH	ATGCTCTTTCCTTGGTCCTGGAGTGACATGATCCTCTGTGTTCAAGGGTCCCATCCTTTGCTGGCAGAGGAGAAGATCAGGAGCCTATCGCTTGGGGGCCTTGCAGCGAATCTGTCAGAGCAAGTCATGCAGCCTCTGTCAGTCACACCTTTCCAAGAAGAGCCTGCTCCACCCTTCGTGGCGCCCACACCGGACAACAGCCCGCCTCAAGCACGAGACCCAGAAGAGGATCTGCTATGCATTGCCAAAACATTTTCATATCTGCGGGAATCTGGCTGGTACTGGGGCTCTATCACAGCCAGCGAAGCCAAGCAGCAGCTCCAGAAGATGCCCGAGGGGACTTTCCTGGTACGGGACAGCACTCACCCCAGCTACTTGTTCACCCTCTCAGTCAAGACC…
BFFQ01001897.1	Protobothrops_flavoviridis	CISH	ATGCTCTTTCCTGGGTCCTGGAGTGACATGATCCTCTGCGTTCAAGGATCCTATCCTTTGGTATCAGAGGAGAAACTCCGGAGGCTGCCAGTTGAAGGCCTTGCAGTGAATGTGTCAGGACAGATGATGCAGCCTCTATCAGTCACATCCTTCCAAGAACAGTCCGCCCCTCCCCTGGCAATGCCCAGGCTTGAAAGCAACTCACCTCAAACACGAGACCCAGAGGAGGATCTGCTATGCATTGCCAGAACATTTTCATTTCTGCGAGAATCAGGCTGGTATTGGGGTTCCATTACAGCCAATGAAGCCAAGCAGCAGCTCCAGAAGATGCCGGAGGGGACTTTTCTGGTACGGGACAGTGCTCATCCCAGCTACCTGTTCACACTATCCGTAAAGACC…
QLTV01003770.1	Thermophis_baileyi	CISH	ATGCTCTTTTCTGAGTCTTGGAGTGACATGATCCTCTGCGTTCAAGGATCCTATCCTTTGGTAGCAGAGGAGAAACTCCGGAGACTACCTGTTGAAGGCCTTGCAATGAATGTGTCAGAACAGGTCATGCAGCCTCTATCAGTCACATCCTTCCAAGAACAGTCTGCCCCTCCCTTGGTAATGCCCGGACTTGAAAGCAACTCACCTCAAACACGAGACCCAGAGGAGGATCTGCTATGCATTGCCAGAACATTTTCATTTCTGAGAGAATCTGGCTGGTATTGGGGTTCTATTACAGCCAATGAAGCCAAGCAGCAGCTCCAGAAGATGCCAGAGGGGACTTTTCTGGTACGGGACAGTGCTCATCCCAGCTACCTGTTCACACTATCCGTAAAGACC…
XM_024217810.1	Terrapene_mexicana	SOCS1	ATGGTAGCGCACAGTAAGGTGGCAGCAGATAATGCAGTTGCAGCAGACCCGAGATGTCGACTTGACCCTCCAGCACGGGATCATTCTCGGCCTAGAGGCTACCATGGCCCGGCTCGGTCCAACACTGGGCAGGCACAGAGCGACACACACTTCCGAACTTTCCGCTCACAGGCGGATTTCAGTAGCATCACCCGAGCGAGTGCCCTGCTGGATGCATGTGGCTTCTACTGGGGTCCACTGACTGTCAGCGCAGCCCACGAGAAGCTGAAATCTGAGCCTGAGGGCACCTTCCTCATCAGGGACAGCAGACAAAAAAATTGCTTCTTTGCCATCAGTGTTAAGACTGCTACTGGGCCCACCAGCATCCGAATAAACTTCCAGGCTGGGCGTTTCAGCCTG…
XM_027820640.1	Chelonia_mydas	SOCS1	ATGGTAGCGCACAGTAAGGTGGCAGCAGATAATGCAGTTGCAGCAGACCCGAGATGTCGACTTGAGCCTCCAGCAAGGGATCATTCTCGGCCTAGAGGTTACCATGGCCCGGCTCGGTCCAACAATGGGCAGGCGCAGAGCGACACACACTTCCGAACTTTCCGCTCGCAGGCAGATTTCAGTAGCATCACCCGAGCGAGCGCCCTGCTGGATGCATGTGGCTTCTACTGGGGCCCACTGACTGTCAGCGCGGCCCACGAGAAGCTGAAATCTGAGCCTGAGGGCACTTTCCTCATCAGGGACAGCAGACAAAAAAATTGCTTCTTTGCCATCAGTGTTAAGACTGTTACTGGGCCCACCAGCATCCGAATAAACTTCCAGGCTGGGCGTTTCAGCCTG…
XM_006266737.3	Alligator_mississippiensis	SOCS1	ATGGTAGCTCAGAGTAAGGTGGCAGCAGATAATGCAGTTGCAGCAGACCCGAGACGTCTACTTGAGTCTCCAGCACGGGATCATCCACAGCCTAGAGTCTACCACGGCTCTGCCCGTCCCAGCACTGTGCAGGCGCAGAGTAACACACACTTTCGAACCTTTCGCTCGCAGGCGGATTTCAGTAGCATCACCCGAGCGAGCGCCTTGTTGGATGCCTGTGGCTTTTATTGGGGACCTCTGACTGTCAATGCTGCCCATGAGAAACTTAAGTCTGAACCTGAGGGCACTTTCCTCCTCAGAGACAGTACACAGAAGAACTGTTTCTTTGCCATCAGTGTTAAGACTGCTACTGGGCCCACCAGCATCAGAATAAACTTCCAGGGTGGATGTTTCAGCCTG…
XM_006128498.3	Pelodiscus_sinensis	SOCS1	ATGGTAGCGCACAGTAAGGTGGCAGCAGATAATGCAGTTGCAGCAGACCCAAGATGTCGACTTGACCCTCCAGCACGGGATCATTCTCAGCCTAGAGGTTACCATGGCCCGGCTCGGTCCAACACTGTGCAAGCACAGAGCGACACACATTTCCGAACCTTCCGCTCACAGGCGGATTTCAGTAGCATCACCCGAGCAAGTGCCCTACTGGATGCATGTGGCTTCTACTGGGGCCCACTGTCAGTCAGCGCAGCCCATGAGAAGCTGAAATCTGAGCCTGAGGGCACTTTCCTCCTCAGAGACAGCAGACAAAAAAATTGCTTCTTTGCCATCAGTGTTAAGACGGCTACTGGACCTACCAGCATCCGAATCAACTTTCAAGCTGGGCGTTTCAGCCTG…
XM_005306729.3	Chrysemys_picta_bellii	SOCS1	ATGGTAGCGCACAGTAAGGTGGCAGCAGATAATGCAGTTGCAGCAGACCCAAGATGTCGACTTGACCCTCCAGCACGGGATCATTCTCGGCCTAGAGGTTACCATGGCCCGGCTCGGTCCAACACTGGGCAGGCGCAGAGCGACACACACTTCCGAACTTTCCGCTCACAGGCGGATTTCAGTAGCATCACCCGAGCGAGTGCCCTGCTGGATGCATGTGGCTTCTACTGGGGTCCACTGACTGTCAGCGCAGCCCACGAGAAGCTGAAATCTGAGCCTGAGGGCACCTTCCTCATCAGGGACAGCAGACAAAAAAATTGCTTCTTTGCCATCAGTGTTAAGACTGCTACTGGGCCCACCAGCATCCGAATAAACTTCCAGGCTGGGCGTTTCAGCCTG…
XM_020808445.1	Pogona_vitticeps	SOCS1	ATGGTAGCACATAGCAGCTTGACACCTGAGAATGGGATCGCAACAGAGCTGAGATTTCGACGGGAGCCCCCCGCCCGGGCCCCTCGGCAGGCCCAGCCCTCCCACCGCCATGGCCCTCCCGGCTGTGGCCAAGCTCCCCGGGACACCCACTTCCACACCTTCCGCTCTCAAGAGGACTTCAACGCCATCATCCGCGCCAGCGCCTTGCTGGAGGAGTGCGGTTTTTATTGGGGACCCCTGTCGGTCAACATGGCCCACGAGAAGCTCAAAGGGGAGCCCGTGGGGACCTTCCTTTTGCGGGACAGCCGGCAGAAGAACTGCTTCTTCACCGTCAGCGTTAAGACGGCCACGGGCCCCACCAGCATCCGGATCATTTTCCAGGCGGGCCGTTTTCACCTG…
XM_015812005.1	Protobothrops_mucrosquamatus	SOCS1	ATGGTAGCACACAGCAGCGTAACGCCTGAGAATGGGATTGCAGTGGAGCTGAGAGGCCGGCTTCAGCCCTCCGTCCGGGCCGCTCTGCAGGTCCGGCCCCCCCACGGCACGGTGCAAGCCCCGCGGGACACCCACTTCCACACCTTCCGCTCCCAGGAGGACTTTGGGATCATCGTCCGCACTAGCGCCTTGCTGGAGAAGTGTGGCTTCTACTGGGGTCCCCTGTCGGTCAGCGCTGCTCACGAGAAACTGAAGGGCGAGCTGGTGGGGACCTTCCTCCTCCGCGACAGCCGGCAAAAAAATTGCTTCTTCACCGTTAGCGTTAAGACGGCCTCCGGGCCCACCAGCGTCCGTGTCCTCTTCCAGTCCGGTCACTTCAGCCTGGAGGGCAGCAAAGAG…
XM_015409927.1	Gekko_japonicus	SOCS1	ATGGTAGCGCATAGCAGCCTGACGCCTGAGAATGCCAGTGCGACGGAGCTGCGGCGGCGTCTGGAGCCCCCCGGGCGAGACCCTTCCTGGCCCCGGGTCCCCCACGGCCTGGCCAGTCCGGACACCCACTTCCACACCTTCCGCTCCCAGGCAGACTTCAGCAGCATCATCCACACCAGTGCCATGCTGGAGGCGTGCGGCTTCTACTGGGGGCCGTTGTCTGTCAGCGCTGCCCACGAGAAGCTCCGGGGGGAGCCGGTGGGCACCTTCCTCCTCCGGGACAGCCGGCAGAAGAACTGCTTCTTCACGGTTAGTGTTAAGACCGCCTCGGGCCCTACCAGCATCCGGGTCATCTTTCAGGCGGGCCGCTTCAGCTTGGACGGTAGCAAAGAGGATTTT…
XM_014075611.1	Thamnophis_sirtalis	SOCS1	ATGGTAGCACACAGCAGCGTCACGCCTGAGCATGGAATTGCAGCGGGGCTGAGAGGCCGGCTCCAGCCCCCCATCCGGGCCGCTCTGCAGGTCCGGCCCCCCCATGGCACAGTGCAAGCCCCACGGGACACCCACTTCCACACCTTCCGCTCACAGGAGGACTTTGGCATCATTGTCCGCACCAGCACCCTGCTGGAGGAGTGCGGCTTCTACTGGGGTCCGCTGTCGGTCAGCGCTGCTCACGAGAAACTGAAGGACGAGCTGGTGGGGACCTTCCTTCTGCGCGACAGCCGGCAAAAGAATTGCTTCTTCAGCGTTAGCGTTAAGACGGCCACCGGCCCTACCAGCGTGCGGGTCCTCTTCCAGGCCGGCCGCTTCAGCCTGGAGGGCAGCAAAGAG…
XM_007434469.3	Python_bivittatus	SOCS1	ATGGTAGCACACAGTAGTGTAACGCCTGAGCATGGAATTGCAACGGAGCTGAGATGTCAGCTTGAGCCCTCTGTCCGGGACGCTCTGCAGGCCCGCGCCCCCCATAGCGCCGTGCAAGCCCCGCGGGACACCCACTTCCACACCTTCCGCTCCCAGGAGGACTTTGGTGTCATCGTCCGCACCAGCGCCCTGCTGGACAAGTGTGGCTTTTACTGGGGTCCGCTGTCTGTCAGGGCTGCGCACGAGAAACTGAAGGATGAGCTGGTGGGGACTTTCCTCATCCGCGACAGCCGGCAAAAGAATTGCTTCTTCACCGTTAGCGTTAAGACGGCCACCGGACCGACCAGCGTCCGCATCCTCTTCCAAGCAGGCCGGTTCAGCCTGGATGGCAGCAAGGAG…
XM_006015506.2	Alligator_sinensis	SOCS1	ATGGTAGCTCAGAGTAAGGTGGCAGCAGATAATGCGGTTGCAGCAGACCCGAGACGTCTACTTGAGTCTCCAGCACGGGATCATCCACAGCCTAGAGTCTACCACGGCTCTGCCCGTCCCAGCACTGTGCAGGCACAGAGTAACACACACTTTCGAACCTTTCGCTCGCAGGCGGATTTCAGTAGCATCACCCGAGCGAGCGCCTTGTTGGATGCCTGTGGCTTTTATTGGGGACCTCTGACTGTCAATGCTGCCCATGAGAAACTTAAGTCTGAACCTGAGGGCACCTTCCTCATCAGGGACAGTACACAGAAGAACTGTTTCTTTGCCATCAGTGTTAAGACTGCTACTGGGCCCACCAGCATCAGAATAAACTTCCAGGGTGGATGTTTCAGCCTG…
XM_026683340.1	Notechis_scutatus	SOCS1	ATGGTAGCACACAGCAGCGTAACGCCTGAGAATGGGATTGCAGCGGAGCTGAGTGGCCGGCTTCAGCCCTCCCTCCGGGCTGCCCTGCAGGTCCGGCCGCCCCACGGCACAGTGCAAGCCCCACAGGACACCCACTTCCACACCTTCCGCTCACAGGAGGACTTTGGCATCATCGCCCGCACCAGCGCCTTGCTGGAGGAGTGCGGCTTCTACTGGGGCCCACTGTCAGTCAGCGCTGCTCACGACAAACTGAAGGGCGAGCTGGTGGGGACCTTCCTTCTCCGCGACAGCCGGCAAAAGAATTGCTTCTTCACCGTTAGCGTTAAGACGGCCACGGGGCCCACCAGCGTCCGGGTCCTCTTCCAGGCCGGCCACTTCAGCCTGGAGGGCAGCAAAGAG…
XM_019540113.1	Crocodylus_porosus	SOCS1	ATGGTAGCTCAGAGTAAGGTGGCAGCAGATAATGCAGTTGCAGCAGACCCGAGACGTCTACTTGACTCTCCAGCACGGGATCATCCACAGCCTAGAGTCTACCGCGGCTCTACCCGTCCCAGCACTGTGCAGGCGCAGAGTGACACACACTTTCGAACCTTTCGCTCGCAGGCGGATTTCAGTAGCATCACCCGAGCGAGCGCCTTGTTGGATGCCTGTGGCTTTTATTGGGGACCTCTGACTGTCAATGCTGCCCATGAGAAACTTAAGTCTGAACCTGAGGGCACCTTCCTCATCAGGGACAGTACACAGAAGAACTGTTTCTTTGCCATCAGTGTTAAGACTGCTACTGGGCCCACCAGCATCAGAATAAACTTCCAGGGTGGATGTTTCAGTCTG…
XM_019507454.1	Gavialis_gangeticus	SOCS1	ATGGTAGCTCAGAGTAAGGTGGCAGCAGATAATGCAGTTGCAGCAGACCCGAGACGTCTACTTGACTCTCCAGCACGGGATCATCCACAGCCTAGAGTCTACCGCGGCTCTACCCGTCCCAGCACTGTGCAGGCGCAGAGTGAGACACACTTTCGAACCTTTCGCTCGCAGGCGGATTTCAGTAGCATCACCCGAGCGAGCGCCTTGTTGGATGCCTGTGGCTTTTATTGGGGACCTCTGACTGTCAATGCTGCCCATGAGAAACTTAAGTCTGAACCTGAGGGCACCTTCCTCATCAGGGACAGTACACAGAAGAACTGTTTCTTTGCCATCAGTGTTAAGACTGCTACTGGGCCCACCAGCATCAGAATAAACTTCCAGGGTGGATGTTTCAGTCTG…
XM_026724432.1	Pseudonaja_textilis	SOCS1	ATGGTAGCACACAGCAGCGTAACGCCTGAGAATGGGATTGCAGCGGAGCTGAGTGGCCGGCTTCAGCCCTCCCTCCGGGCTGCCCTGCAGGTCCGGCCACCCCACGGCACAGTGCAAGCCCCACAGGACACCCACTTCCACACCTTCCGCTCACAGGAGGACTTTGGCATCATCGCCCGCACCAGCGCCTTGCTGGAGGAGTGCGGCTTCTACTGGGGCCCGCTGTCAGTCAGCGCTGCTCACGACAAACTGAAGGGCGAGCTGGTAGGGACCTTCCTTCTCCGCGACAGCCGGCAAAAGAATTGCTTCTTCACCGTTAGCGTTAAGACGGCCACGGGGCCCACCAGCGTCCGGGTCCTCTTCCAGGCCGGTCACTTCAGCCTGGAGGGCAGCAAAGAG…
KB929949.1	Apalone_spinifera	SOCS1	ATGGTAGCGCACAGTAAGGTGGCAGCAGATAATGCAGTTGCAGCAGACCCAAGATGTCGACTTGACCCTCCAGCACGGGATCATTCTCAGCCTAGAGGTTACCATGGCCCGGCTCGGTCCAACACTGTGCAAGCACAGAGCGACACACACTTCCGAACCTTCCGCTCACAGGCAGATTTCAGTAGCATCACCCGAGCAAGTGCCCTACTGGATGCATGTGGCTTCTACTGGGGCCCACTGTCAGTCAGCGCAGCCCACGAGAAGCTGAAATCTGAGCCTGAGGGCACTTTCCTCCTCAGAGACAGCAGACAAAAAAATTGCTTCTTTGCCATCAGTGTTAAGACGGCTACTGGACCTACCAGCATCCGAATCAACTTCCAAGCTGGGCGTTTCAGCCTG…
PKMU01001345.1	Chelonoidis_abingdonii	SOCS1	ATGGTAGCGCACAGTAAGGTGGCAGCAGATAATGCAGTTGCAGCAGATCCGAGATGTCGACTTGACCCTCCAGCACGGGATCATTCTCGGCCTAGAGGTTACCATGGCCCGGCTCGGTCCAACACTGGGCAGGCGCCGAGCGAGACACACTTTCGAACTTTCCGCTCGCAGGCGGATTTCAGTAGCATCACCAGAGCGAGTGCCCTGCTGGAGGCATGTGGCTTTTACTGGGGTCCACTGACTGTCAGTGCGGCCCATGAGAAGCTGAAATCTGAGCCTGAGGGCACCTTCCTCATCAGGGACAGCAGACAAAAAAATTGCTTCTTTGCCATCAGTGTTAAGACTGCTACTGGGCCCACCAGCATCCGAATAAACTTCCAGTCTGGGCGTTTCAGCCTG…
LVCR01070556.1	Crotalus_horridus	SOCS1	ATGGTAGCACACAGCAGCGTAACGCCTGAGAATGGGATTGCAGTGGAGCTGAGAGGCCGGCTTCAGCCCTCCGTCCGGGCCGCTCTGCAGGTCCGGCCCCCCCACGGCACGGTGCAAGCCCCACGGGACACCCACTTCCACACCTTCCGCTCACAGGAGGACTTTGGGATCATCGTCCGCACTAGCGCCTTGCTGGAGAAGTGTGGCTTCTACTGGGGTCCCCTGTCGGTCAGCGCTGCTCACGAGAAACTGAAGGGTGAGCTGGTGGGGACCTTCCTCCTCCGCGACAGCCGGCAAAAAAATTGCTTCTTCACCGTTAGCGTTAAGACGGCCACCGGGCCCACCAGCGTCCGTGTCCTCTTCCAGTCCGGTCACTTCAGCCTGGAGGGCAGCAAAGAG…
JPMF01242527.1	Crotalus_pyrrhus	SOCS1	ATGGTAGCACACAGCAGCGTAACGCCTGAGAATGGGATTGCAGTGGAGCTGAGAGGCCGGCTTCAGCCCTCCGTCCGGGCCGCTCTGCAGGTCCGGCCCCCCCACGGCACGGTGCAAGCCCCACGGGACACCCACTTCCACACCTTCCGCTCACAGGAGGACTTTGGGATCATCGTCCGCACTAGCGCCTTGCTGGAGAAGTGCGGCTTCTACTGGGGTCCCCTGTCGGTCAGCGCTGCTCACGAGAAACTGAAGGGTGAGCTGGTGGGGACCTTCCTCCTCCGCGACAGCCGGCAAAAAAATTGCTTCTTCACCGTTAGCGTTAAGACGGCCACCGGGCCCACCAGCGTCCGTGTCCTCTTCCAGGCCGGTCACTTCAGCCTGGAGGGCAGCAAAGAG…
PDHV01003445.1	Crotalus_viridis	SOCS1	ATGGTAGCACACAGCAGCGTAACGCCTGAGAATGGGATTGCAGTGGAGCTGAGAGGCCGGCTTCAGCCCTCCGTCCGGGCCGCTCTGCAGGTCCGGCCCCCCCACGGCACGGTGCAAGCCCCACGGGACACCCACTTCCACACCTTCCGCTCACAGGAGGACTTTGGGATCATCGTCCGCACTAGCGCCTTGCTGGAGAAGTGCGGCTTCTACTGGGGTCCCCTGTCGGTCAGCGCTGCTCACGAGAAACTGAAGGGTGAGCTGGTGGGGACCTTCCTCCTCCGAGACAGCCGGCAAAAAAATTGCTTCTTCACCGTTAGCGTTAAGACGGCCACCGGGCCCACCAGCGTCCGTGTCCTCTTCCAGGCCGGTCATTTCAGCCTGGAGGGCAGCAAAGAG…
ML123155.1	Cuora_mccordi	SOCS1	ATGGTAGCGCACAGTAAGGTGGCAGCAGATAATGCAGTTGCAGCAGATCCGAGATGTCGACTTGACCCTCCAGCACGGGATCATTCTCGGCCTAGAGGTTACCATGGCCCGGCTCGGTCCAACGCTGGGCAGGCGCAGAGCGACACACACTTCCGAACTTTCCGCTCGCAGGCGGATTTCAGTAGCATCACCCGAGCGAGTGCCCTGCTGGATGCATGTGGCTTTTACTGGGGTCCACTGACTGTCAGCGCAGCCCATGAGAAGCTGAAATCTGAGCCCGAGGGCACCTTCCTCATCAGGGACAGCAGACAAAAAAATTGCTTCTTTGCCATCAGTGTTAAGACTGCTACTGGGCCCACCAGCATCCGAATAAACTTCCAGTCTGGGCGTTTCAGCCTG…
RSAE01112590.1	Hydrophis_cyanocinctus	SOCS1	ATGGTAGCACACAGCAGCGTAACGCCTGAGAATGGGATTGCAGCGGAGCTGAGTGGCCGGCTTCAGCCCTCCCTCCGGGCTGCCCTGCAGGTTCGGCCGCCCCACGGCACAGTGCAAGCCCCCCAGGAAACCCACTTCCACACCTTCCGCTCACAGGAGGACTTTGGCATCATCGCCCGCACCAGCGCCTTGCTGGAGGAGTGCGGCTTCTACTGGGGCCCGCTGTCAGTCAGCGCTGCTCACGACAAACTGAAGGGCGAGCTGGTGGGGACCTTCCTTCTCCGCGACAGCCGGCAAAAGAATTGCTTCTTCACCGTTAGCGTTAAGACGGCCACGGGGCCCACCAGCGTCCGGGTCCTCTTCCAGGCCGGCCACTTCAGCCTGGAGGGCAGCAAAGAG…
RSAD01227926.1	Hydrophis_hardwickii	SOCS1	ATGGTAGCACACAGCAGCGTAACGCCTGAGAATGGGATTGCAGCGGAGCTGAGTGGCCGGCTTCAGCCCTCCCTCCGGGCTGCCCTGCAGGTTCGGCCGCCCCACGGCACAGTGCAAGCCCCACAGGAAACCCACTTCCACACCTTCCGCTCACAGGAGGACTTTGGCATCATCGCCCGCACCAGCGCCTTGCTGGAGGAGTGCGGCTTCTACTGGGGCCCGCTGTCAGTCAGCGCTGCTCACGACAAACTGAAGGGCGAGCTGGTGGGGACCTTCCTTCTCCGCGACAGCCGGCAAAAGAATTGCTTCTTCACCGTTAGCGTTAAGACGGCCACGGGGCCCACCAGCGTCCGGGTCCTCTTCCAGGCCGGCCACTTCAGCCTGGAGGGCAGCAAAGAG…
OFHV01003239.1	Lacerta_bilineata	SOCS1	ATGGTAGCACATAGCAGCGTGACTCCTGAGAATGGGATCGCGACAGGCCTGAGGTGTCGACTTGAGCCCTCGCTCCGGGACGCCCTGCAAGCCCGAGTCCCTCGCGCTCTCGGCTGTGCCAACGCCGTGCCAGCGCCCCGGGACACCCACTTCCACACCTTTCGCTCGCAGGCGGACTTCAGCACCATCATTCGCACCAGCGCCTTGCTGGATGAGTGCGGTTTTTACTGGGGGCCGTTGTCGGTCAACGCGGCCCATGAGAAGCTCAGAGGCGAGCATGTGGGGACCTTCCTCATCCGGGACAGCCGGCAGAAGAACTGCTTCTTCACCGTCAGCGTCAAGACTGCCGCGGGACCCACGAGCATCCGCGTGGTCTTCCAGGCCGGCCGCTTCAGCTTG…
OFHU01001193.1	Lacerta_viridis	SOCS1	ATGGTAGCGCATAGCAGCGTGACTCCTGAGAATGGGATCGCGACAGGCCTGAGGTGTCGACTTGAGCCCTCGCTCCGGGACGCCCTGCAAGCCCGAGTCCCTCGCGCTCTCGGCTGTGCCAACGCCGTGCCAGCGCCCCGGGACACCCACTTCCACACCTTTCGCTCGCAGGCGGACTTCAGCACCATCATTCGCACCAGCGCCTTGCTGGATGAGTGCGGTTTTTACTGGGGGCCGTTGTCGGTCAACGCGGCCCATGAGAAGCTCAAAGGCGAGTCCGTGGGGACCTTCCTCATCCGGGACAGCCGGCAGAAGAACTGCTTCTTCACCGTCAGCGTTAAGACTGCCACGGGACCCACGAGCATCCGCGTGGTCTTCCAGGCCGGCCGCTTCAGCTTG…
MDXI01011271.1	Malaclemys_terrapin	SOCS1	ATGGTAGCGCACAGTAAGGTGGCAGCAGATAATGCAGTTGCAGCAGACCCAAGATGTCGACTTGACCCTCCAGCACGGGATCATTCTCGGCCTAGAGGTTACCATGGCCCGGCTCGGTCCAACACTGGGCAGGCGCAGAGCGACACACACTTCCGAACTTTCCGCTCACAGGCGGATTTCAGTAGCATCACCCGAGCGAGTGCCCTGCTGGATGCATGTGGCTTCTACTGGGGTCCACTGACTGTCAGCGCAGCCCACGAGAAGCTGAAATCTGAGCCTGAGGGCACCTTCCTCATCAGGGACAGCAGACAAAAAAATTGCTTCTTTGCCATCAGTGTTAAGACTGCTACTGGGCCCACCAGCATCCGAATAAACTTCCAGGCTGGGCGTTTCAGCCTG…
JTLQ01399243.1	Pantherophis_guttatus	SOCS1	ATGGTAGCACACAGCAGCGTAACGCCCGAGAATGGAATTGCAGCGGAGCTGAGAGGCCGGCTTCAGCCCCCCATCCGGGCCGCTCTGCAGGTCCGGCCCCCCCACGGCACAGTGCAAGCCCCGCGGGACACCCACTTCCACACCTTCCGCTCACAGGAGGACTTTGGCATCATCGTCCGCACCATCACCTTGCTGGAGGAGTGCGGCTTCTACTGGGGTCCGCTGTCGGTCAGCGCTGCTCACGAGAAACTGAAGGACGAGCTGGTGGGGACCTTCCTTCTCCGCGACAGCCGGCAAAAGAATTGCTTCTTCAGCGTTAGCGTTAAGACGGCCACTGGGCCCACCAGCGTCCGGGTCCTCTTCCAGGCCGGTCACTTCAGCCTGGAGGGCAGCAAAGAG…
BDOT01000172.1	Paroedura_picta	SOCS1	ATGGTTGCCCATAGCAGCGTGACGCCCGAGCATGGCAGAGCGACGGAGCTGCGTCGGCGCCTGGAGCCCCCCGCCCGGGACCCTTCCCGGCCCCGCATCCCCCCCGGCCGGGCCGTCCCGGACACCCACTTCCCCACCTTCCGCTCGCAGGCGGACTTCAGCAGCATCATTCGCACCAGCGCCCTGCTGGAGGCGTGCGGCTTCTACTGGGGGCCGCTGCCCGTCAGCGCGGCCCACGAGAAGCTGCGGGGGGAGTCGGTGGGCACCTTCCTCCTGCGGGACAGCCGGCAGAAGAACTGCTTCTTCACCATCAGCGTCAAGACGGCCTCCGGGCCCACCAGCATCCGGGTGGTCTTCCAGGGGGGCCGCTACAGCCTGGACGGCAGCCGGGAGGACTTC…
QXTE01000324.1	Platysternon_megacephalum	SOCS1	ATGGTAGCGCACAGTAAGGTGGCAGCAGATAATGCAGTTGCAGCAGACCCGAGATGTCGACTTGACCCTCCAGCACGGGATCATTCTCGGCCTAGAGGTTACCATGGCCCGGCTCGGTCCAACGCTGGGCAGGCGCAGAGCGACACACACTTCCGAACTTTCCGCTCGCAGGCGGATTTCAGTAGCATCACCCGAGCGAGTGCCCTGCTGGATGCATGTGGCTTCTACTGGGGTCCACTGACTGTCAGCGCGGCCCACGAGAAGCTGAAATCTGAGCCCGAGGGCACCTTCCTCATCAGGGACAGCAGACAAAAAAATTGCTTCTTTGCCATCAGTGTTAAGACTGCTACTGGGCCCACCAGCATCCGAATAAACTTCCAGGCTGGGCGTTTCAGCTTG…
BFFQ01002049.1	Protobothrops_flavoviridis	SOCS1	ATGGTAGCACACAGCAGCGTAACGCCTGAGAATGGGATTGCAGTGGAGCTGAGAGGCCGGCTTCAGCCCTCCGTCCGGGCCGCTCTGCAGGTCCGGCCCCCCCACGGCACGGTGCAAGCCCCGCGGGACACCCACTTCCACACCTTCCGCTCACAGGAGGACTTTGGGATCATCGTCCGTACTAGCGCCTTGCTGGAAAAGTGCGGCTTCTACTGGGGTCCCCTGTCGGTCAGCGCTGCTCACGAGAAACTGAAGGGTGAGCTGGTGGGGACCTTCCTCCTTCGCGACAGCCGGCAAAAAAATTGCTTCTTCACCGTTAGCGTTAAGACGGCCACCGGGCCCACCAGCGTCCGTGTCCTCTTCCAGTCCGGTCACTTCAGCCTGGAGGGCAGCAAAGAG…
QEPC01001501.1	Sphenodon_punctatus	SOCS1	ATGGTAGCGCACAGCAAGGTGGCAGCAGATAATGCAGTTTCAGCAGATCGGAGATGTCGACTTGAACCTCCCGCACGAGATCCCTCTCAGGCCAGAGCTCCCCGTGGCCTGGCCCGGCCCAGCACTGTGCAGGCACAGAGTGACACACACTTCCGTACCTTCCGGTCACAGGCGGATTTCAGTAGCATCACCCGAGCGAGCACTTTGCTGGACGCATGTGGTTTCTATTGGGGCCCGCTGACCGTCAGTGCTGCCCACGAGAAGCTCAAAGGAGAACCTGAGGGCACTTTTCTCATCAGGGACAGCCGGCAAAAGAATTGCTTCTTTGCCATAAGTGTCAAGACTGCCACTGGGCCCACCAGCATCCGGATAAACTTCCAGGCTGGGCGTTTCAGCCTG…
QLTV01001126.1	Thermophis_baileyi	SOCS1	ATGGTAGCACACAGCAGCGTAACGCCCGATAATGGAATTGCAGCAGAGCTGAGAGGCCGGCTTCAGCCCCCCATCCGGGCCGCTCTGCAGGTCCGGCCCCCCCACGGCACAGTGCAAGCCCCGCGGGACACCCACTTCCACACCTTCCGCTCGCAGGAGGACTTTGGCATCATCGTCCGCACCAGCACCTTGCTGGAGGAGTGCGGCTTCTACTGGGGCCCGCTGTCGGTCAGCGCTGCTCACGAGAAACTGAAGGACGAGCTGGTGGGGACCTACCTTCTCCGCGACAGCCGGCAAAAGAATTGCTTCTTCAGCGTTAGTGTTAAGACGGCCACCGGGCCCACCAGCGTCCGGGTCCTCTTCCAGGCCGGTCACTTCAGCCTGGAGGGCAGCAAAGAG…
KN635849.1	Vipera_berus	SOCS1	ATGGTAGCACACAGCAGCGTAACGCCTGAGAATGGGATTGCAGTGGAGCTGAGAGGCCGGCTTCAGCCCTCCGTCCAGGCTGCTCTGCAGGTCCGGCCCCCCCACGGCACGGTGCAAGCCCCGCGGGACACCCACTTCCACACCTTCCGCTCACAGGAGGACTTTGGGATCATTGTCCGCACTAGCGCCTTGCTGGAGAAGTGCGGCTTCTACTGGGGTCCCCTGTCGGTCAGCGCTGCTCATGAGAAACTGAAGGGTGAGCTGGTGGGGACCTTCCTCCTCCGCGATAGCCGGCAAAAAAATTGCTTCTTCACTGTTAGCGTTAAGACGGCCACCGGGCCCACCAGCGTCCGTGTCCTCTTCCAGGCCGGTCACTTCAGCCTGGAGGGCAGCAAAGAG…
XM_024218188.1	Terrapene_mexicana_triunguis	SOCS2	ATGACCCTGCGCTCTTCCGAGTCCTCGGATGGCGCGGAGCGGGCCGGGACCGAGTGGCGGGGTCCCGGGGCTGAGGTGACCGAGAGGGCGGCGGCGGAGCGCCTGGTCGCGGCCATGGAGGAGCTGAGGCGGGCAGGGTGGTACTGGGGCAGTATGAATGTTGCTGAAGCCAAAGAGAGATTACAAGATACTCCTGAAGGTACTTTCTTGGTTAGAGACAGCTCCCATTCAGAGTATCTACTGACTATCTCCGTAAAAACATCAGCTGGACCAACCAATCTGCGTATCGAGTATCAAGACGGCAAATTCAGACTGGACTCCATCATATGTGTCAGATCTCGGCTTAAACAATTTGATAGTGTGGTCCATCTGATTGAATACTACGTTCTTACATGCAAG…
XM_006126878.1	Pelodiscus_sinensis	SOCS2	ATGGAGGAGCTGAGGCGGGCAGGGTGGTACTGGGGCAATATGAATGTTGCTGAAGCCAAAGAAAGATTACAAGATACACCTGAAGGTACTTTCTTGGTTAGAGACAGCTCACATTCGGAGTACCTACTGACTATTTCAGTAAAAACATCAGCTGGACCAACCAATCTGCGTATTGAGTATCAAAATGGCAAATTCAGACTGGATTCCATCATATGTGTCAGATCTAGGCTTAAACAGTTTGATAGTGTGGTTGATCTGATTGAATACTATGTTCTTACATGCAAGGATAGAAAAACCGGGCCTGAAACTCCACCAAATGGAACAGTGCATCTTTATTTGAACAAACCCCTCTATACTTCAACTCCATCTCTGCAACATCGCTGTAGAATAACTATAAAC…
XM_020815913.1	Pogona_vitticeps	SOCS2	ATGACCCTGCGCGCGGCCGAATCCTCCGACGGCACCGACAGGGCTGGGCCCCAGTGGGAGGCTGGAGGGGCTGCGGTGGAGCCTTCCGAAGCGGGGCGCCTGGACGTTGCCATGCGGGAGTTAAGACGCGCAGGATGGTACTGGGGTAACATGACTGTTGCAGAAGCCAAGGAGAAATTACAAGATACATCTGAAGGGACTTTTCTGGTGAGAGACAGCTCTCACTCCGAGTACCTGCTTACCATTTCTGTCAAAACATCAGCAGGACCTACCAACCTGCGCATTGAATTTCAAGATGGTAAATTCAGGCTGGATTCTATTATTTGTGTTCGATCAAGACTCCGGCAGTTTGACAGTGTGGTCCATCTGATTGAATACTACGTTCTTATGTGCAAGGAC…
XM_015420980.1	Gekko_japonicus	SOCS2	ATGACCCTGCGCTCGGCCGAATCCGCGGATGGTGCCGCCGACCGGGCTGGAGGGGCTGCGGCGGAGCACGCCGAAGCGGACCGCCTGGACGCTGCCATGCGGGAGCTGAGACGCTCAGGATGGTACTGGGGTAACATGAGTGTTGCAGAAGCCAAAGAGAGATTACAAGATACTTCTGAAGGGACTTTCTTGGTCAGAGACAGCTCGCACTCGGAGTATTTGCTTACTATTTCGGTAAAAACATCAGCGGGACCGACCAACCTACGTATAGAATTTCAAGATGGGAAATTCAGACTGGATTCTATCATCTGTGTCCGATCAAGGCTCCGGCAGTTCAACAGTGTGGTCCACCTGATTGAATATTATGTCCTTATGTGCCAGGACAGAAGTACTGCCACT…
XM_019480971.1	Alligator_mississippiensis	SOCS2	ATGGAGGAGCTGCGGCGGGCAGGGTGGTACTGGGGCAATATGAGTGTTGCTGAAGCTAAAGAGAGATTACAAGATGCCCCTGAAGGGACTTTCTTGGTTAGAGACAGCTCACATTCAGAGTACCTATTGACTATCTCAGTGAAAACTTCCGCAGGACCAACAAATCTGCGTATAGAATATCAGGACGGCAAATTCAGGCTGGACTCTATCACCTGTGTCAGATCAAGACTTAAACAGTTCAACAGTGTGGTCCATCTGATTGAGTACTATGTCCTCATGTGCAAGGATAGAAGTGGGTCTGAAACAACGTCAAATGGAACAGTGCATCTTTATTTGAACAAACCCCTCTATACTTCAGCTCCATCCCTGCAACATCGCTGTAGGATAACTATAAACAAA…
XM_025208124.1	Alligator_sinensis	SOCS2	ATGGAGGAGCTGCGGCGGGCAGGGTGGTACTGGGGCAATATGAGTGTTGCTGAAGCTAAAGAGAGATTACAAGATGCCCCTGAAGGGACTTTCTTGGTTAGAGACAGCTCACATTCAGAGTACCTATTGACTATCTCAGTGAAAACTTCCGCAGGACCAACAAATCTGCGTATAGAATATCAGGACGGCAAATTCAGGCTGGACTCTATCACCTGTGTCAGATCAAGACTTAAACAGTTCAACAGTGTGGTCCATCTGATTGAGTACTATGTCCTCATGTGCAAGGATAGAAGTGGGTCTGAAACAACGTCAAATGGAACAGTGCATCTTTATTTGAACAAACCCCTCTATACTTCAGCTCCATCCCTGCAACATCGCTGTAGGATAACTATAAACAAA…
XM_024099668.1	Chrysemys_picta_bellii	SOCS2	ATGACCCTGCGCTCTTCCGAGTCCTCGGATGGCGCGGAGCGGGCCGGGACCGAGTGGCGGGGTCCCGGGGCTGAGGTGACCGAGAGGGCGGCGGCGGAGCGCCTGGTCGCGGCCATGGAGGAGCTGAGGCGGGCAGGATGGTACTGGGGCAGTATGAATGTTGCTGAAGCCAAAGAGAGATTACAAGATACTCCTGAAGGTACTTTCTTGGTTAGAGACAGCTCCCATTCAGAGTATCTACTGACTATCTCCGTAAAAACATCAGCTGGACCAACCAATCTGCGTATCGAGTATCAAGACGGCAAATTCAGACTGGACTCCATCATATGTGTCAGATCTCGGCTTAAACAATTTGATAGTGTGGTCCATCTGATTGAATACTACGTTCTTACATGCAAG…
XM_026698665.1	Pseudonaja_textilis	SOCS2	ATGACCCTGCGCTCGGCCGAATCTTCGGATGGCACCGACAGGGCTGGGCCCCAGTGGGAAGCTGGAGGAGCTTCGGCGGAACCTGCTGAAGGGGAGCGCCTGGACTCTGCCATGAGGGAGTTGAGATGCGCGGGATGGTATTGGGGAAGCATGAGTGTTGCAGAAGCAAAGGAAAGATTACAAGATGCATCTGAAGGGACTTTCTTGGTCAGAGACAGCTCTCACTCAGAGTATTTACTTACTATTTCAGTCAAAACCTCAGTAGGTCCTACCAATTTACGAATAGAATTTCAAGGTGGTAAATTCCGTCTGGATTCTGTTATCTGCATCCGATCAAGGCTCCAGCAATTTGACAGTGTGGTTCACCTAATTGAATATTATGTCCTTATGTGCAAGGAC…
XM_026693810.1	Notechis_scutatus	SOCS2	ATGACCCTGCGCTCGGCCGAATCTTCGGATGGCACCGACAGGGCTGGGCCCCAGTGGGAAGCTGGAGGAGCTTCGGCGGAACCTGCTGAAGGGGAGCGCCTGGACTCTGCCATGAGGGAGTTGAGATGCGCGGGATGGTATTGGGGAAGCATGAGTGTTGCAGAAGCAAAGGAAAGATTACAAGATGCATCTGAAGGGACTTTCTTGGTCAGAGACAGCTCTCACTCAGAGTATTTACTTACTATTTCAGTCAAAACCTCAGTAGGTCCTACCAATTTACGAATAGAATTTCAAGGTGGTAAATTCCGTCTGGATTCTGTTATATGCATCCGATCAAGGCTCCAGCAATTTGACAGTGTGGTTCACCTAATTGAATATTATGTCCTTATGTGCAAGGAC…
XM_019545240.1	Crocodylus_porosus	SOCS2	ATGGAGGAGCTGCGGCGGGCAGGGTGGTACTGGGGCAATATGAGTGTTGCTGAAGCTAAAGAGAGATTACAAGATGCCCCTGAAGGGACTTTCTTGGTTAGAGACAGCTCACATTCAGAGTACCTATTGACTATCTCAGTGAAAACATCCGCAGGACCAACAAATCTGCGTATAGAATATCAGGATGGCAAATTCAGGCTGGACTCTAACACCTGTGTCAGATCAAGGCTTAAACAGTTCAACAGTGTGGTCCATCTGATTGAACACTATGTCCTCATGTGCAAGGATAGAAGTGGGTCTGAAACAACGTCAAATGGAACCGTGCATCTTTATTTGAACAAACCCCTCTATACTTCAGCTCCGTCCCTGCAACACCGCTGTAGGATAACTATAAACAAA…
XM_015812923.1	Protobothrops_mucrosquamatus	SOCS2	ATGACCCTGCGCTCGGCCGAATCCTCGGATGGCACCGACAGGGCTGGGGCCGAGTGGGAAGCTGGAGGAGCCGCGGCGGAACCTGCTGAAGGGGAACGCCTGGACTCTGCCATGCGGGAGTTGAGATGCGCGGGATGGTATTGGGGAAGCATGAGTGTTGCAGAAGCAAAGGAAAGATTACAAGAAACATCTGAAGGGACTTTCTTGGTCAGAGACAGCTCTCACTCAGAATATTTACTTACTATTTCAGTCAAAACCTCAGTAGGTCCTACCAACTTACGAATAGAATTTCAAGGTGGTAAATTCAGTCTGGATTCTGTTATCTGCATTCGATCAAGACTCCAGCAATTTGATAGTGTGGTTCACCTAATTGAATATTATGTCCTTATGTGCAAGGAT…
XM_014056496.1	Thamnophis_sirtalis	SOCS2	ATGACCCTGCGCTCGGCCGAATCCTCGGATGGCACCGACAGGGCTGGGCCCCAATGGGAAGCTGGAGGAGCTTCGGCGGAACCTGCTGAAGGGGAGCGCCTGGACTCTGCCATGAGGGAGCTGAGATGCGCGGGATGGTATTGGGGAAACATGAGTGTGGCAGAAGCAAAGGAAAGATTACAAGATACATCTGAAGGGACTTTCTTGATCAGAGATAGCTCTCACTCAGAGTATTTACTTACTATTTCAGTTAAAACCTCAGTAGGTCCTACCAACTTACGAATAGAATTTCAAGGTGGTAAATTCCGTCTGGATTCTGTTATCTGCATCCGATCAAAGCTCCAGCAATTTGACAGTGTGGTTCATCTAATTGAATATTATGTCCTTATGTGCAAGGAC…
XM_025171476.1	Python_bivittatus	SOCS2	ATGACCCTGCGCTCGGCCGAATCCTCGGATGGCACCGACAGGACTGGGCCCCAGTGGGAGGCTGGAGGAGCCGCGGCGGAGCCTGCTGAAAGAGAGCGTCTGGCCTCTGCCATGCGGGAGTTGAGATGCGCGGGATGGTATTGGGGAAACATGAGTGTTGCAGAAGCAAAGGAAAGATTACAAGATACATCTGAAGGGACTTTCTTGGTCAGAGACAGCTCTCATTCAGAGTATTTGCTTACTATTTCAGTCAAAACCTCAGCAGGTCCCACCAACTTACGAATAGAATTTCAAGGTGGTAAATTCCGTCTAGATTCTGTTATCTGTATCCGATCAAGACTCCAGCAGTTTGACAGTGTGGTTCACCTGATTGAATATTATGTCCTTATGTGCAAAGAT…
XM_007069232.2	Chelonia_mydas	SOCS2	ATGAATGTTGCTGAAGCCAAAGAGAGATTACAGGATACTCCTGAAGGTACTTTCTTGGTTAGAGACAGCTCCCATTCGGAGTACCTACTGACTATCTCAGTAAAAACATCAGCTGGACCAACCAATCTGCGTATCGAGTATCAAGACGGCAAATTCAGACTGGACTCCATTGTATGTGTCAGATCTCGGCTTAAACAATTTGATAGTGTGGTCCATCTTATTGAATACTACGTTCTTACATGCAAGGATAGAAAAACTGGGCCTGAAACTCCATCAAATGGAACAGTGCATCTTTATTTGAACAAACCTCTATATACTTCAACTCCATCTTTGCAACATCGCTGTAGAATAACTATAAACAAATGTACAAATAAGATCTTGGAACTGCCTTTACCAACA…
XM_003221079.3	Anolis_carolinensis	SOCS2	ATGACCCTGCGCTCGGAGGAGACCTCGGATGGCGGCGGCGAGGAGGAGGCTCCCGGCGAGGCGGAGCGCCTGGACTCGGCTATGCGGGAGCTGCGGCGAGCGGGTTGGTATTGGGGCAACATGAGTGTTGCAGAAGCCAAAGATAGACTGCAGGACACCTCCGAAGGGACTTTCCTGGTCAGGGACAGTTCTCACTCCGAATACCTGCTGACCATTTCGGTAAAAACGTCAGCAGGGCCCACAAACCTGCGCATTGAGTTTCAGGACGGCAAATTCCGACTGGATTCTATCATCTGCGTCCGATCGAGGCTTCGACAGTTTGACAGCGTGGTCCATTTGATTGAGTATTACGTTCTGATGTGCAAGGACAGGAGTACGGTTTCTGAAATGCCTTCCAAC…
PKMU01001018.1	Chelonoidis_abingdonii	SOCS2	ATGACCCTGCGCTCTTTCGAGCCCTCGGATGGCGCGGAGCGGGCCGGGACCGAGTGGCGGGGTCCCGGGGCTGAGGTGACCGAGCGGGCGGCGGCGGAGCACCTGGCCGCGGCCATGGAGGAGTTGAGGCGGGCAGGGTGGTACTGGGGCAGTATGAATGTTGCTGAAGCCAAAGAGAGATTACAAGATACTCCTGAAGGTACTTTCTTGGTTAGAGACAGCTCCCATTCGGAGTATCTATTGACTATCTCGGTAAAAACATCAGCTGGACCAACCAATCTGCGTATCGAGTATCAAGACGGCAAATTCAGACTGGACTCCATCATATGTGTCAGATCTCGGCTTAAACAATTTGATAGTGTGGTCCATCTGATTGAATACTATGTTCTTACATGCAAG…
LVCR01005579.1	Crotalus_horridus	SOCS2	ATGACCCTGCGCTCGGCCGAATCCTCGGATGGCACCGACAGGGCTGGGGCCGAGTGGGAAGCTGGAGGAGCCGCGGCGGAACCTGCTGAAAGGGAGCGCCTGGACTCTGCCATGCGGGAGTTGAGATGCGCGGGATGGTATTGGGGAAGCATGAGTGTTGCAGAAGCAAAGGAAAGATTACAAGAAACATCTGAAGGGACTTTCTTGGTCAGAGACAGCTCTCACTCAGAGTATTTACTTACTATTTCAGTCAAAACCTCAGTAGGTCCTACAAACTTACGAATAGAATTTCAAGGTGGTAAATTCAGTCTGGATTCTGTTATCTGCATTCGATCAAGACTCCAGCAATTTGACAGTGTGGTTCACCTAATTGAATATTATGTCCTTATGTGCAAGGAT…
JPMF01181018.1	Crotalus_pyrrhus	SOCS2	ATGACCCTGCGCTCGGCTGAATCCTCGGATGGCGCCGACAGGGCTGGGGCCGAGTGGGAAGCTGGAGGAGCCGCGGCGGAACCTGCTGAAAGGGAGCGCCTGGACTCTGCCATGCGGGAGTTGAGATGCGCGGGATGGTATTGGGGAAGCATGAGTGTTGCAGAAGCAAAGGAAAGATTACAAGAAACATCTGAAGGGACTTTCTTGGTCAGAGACAGCTCTCACTCAGAGTATTTACTTACTATTTCAGTCAAAACCTCAGTAGGTCCTACAAACCTACGAATAGAATTTCAAGGTGGTAAATTCAGTCTGGATTCTGTTATCTGCATTCGATCAAGACTCCAGCAATTTGACAGTGTGGTTCACCTAATTGAATATTATGTCCTTATGTGCAAGGAT…
PDHV01000413.1	Crotalus_viridis	SOCS2	ATGACCCTGCGCTCGGCCGAATCCTCGGATGGCGCCGACAGGGCTGGGGCCGAGTGGGAAGCTGGAGGAGCCGCGGCGGAACCTGCTGAAAGGGAGCGCCTGGACTCTGCCATGCGGGAGTTGAGATGCGCGGGATGGTATTGGGGAAGCATGAGTGTTGCAGAAGCAAAGGAAAGATTACAAGAAACATCTGAAGGGACTTTCTTGGTCAGAGACAGCTCTCACTCAGAGTATTTACTTACTATTTCAGTCAAAACCTCAGTAGGTCCTACAAACTTACGAATAGAATTTCAAGGTGGTAAATTCAGTCTGGATTCTGTTATCTGCATTCGATCAAGACTCCAGCAATTTGACAGTGTGGTTCACCTAATTGAATATTATGTCCTTATGTGCAAGGAT…
ML123137.1	Cuora_mccordi	SOCS2	ATGACCCTGCGCTCTTTCGAGCCCTCGGATGGCGCGGAGCGGGCCGGGACCGAGTGGCGGGGTCCCCGGGCTGAGGTGAGCGAGCGGGCGGCGGCGGAGCGCCTGGCCGCGGCCATGGAGGAGCTGAGGCGGGCAGGGTGGTACTGGGGCAGTATGAATGTTGCGGAAGCCAAAGAGAGATTACAAGATACTCCTGAAGGTACTTTCTTGGTTAGAGACAGCTCCCATTCAGAGTATCTACTCACTATCTCGGTAAAAACATCAGCTGGACCAACCAATCTGCGTATCGAGTATCAAGACGGCAAATTCAGACTGGACTCCATCATATGTGTCAGATCTCGGCTTAAACAATTTGATAGTGTGGTCCATCTGATTGAATACTACGTCCTTACATGTAAG…
RSAE01445528.1	Hydrophis_cyanocinctus	SOCS2	ATGACCCTGCGCTCGGCCGAATCTTCGGATGGCACCGACAGAGCTGGGCCCCAGTGGGAAGCTGGAGGAGCTTCGGCGGAACCTGCTGAAGGGGAACGCCTGGACTCTGCCATGAGGGAGTTGAGATGCGCGGGATGGTATTGGGGAAGCATGACTGTTGCAGAAGCAAAGGAAAGATTACAAGATGCATCTGAAGGGACTTTCTTGGTCAGAGACAGCTCTCACTCAGAGTATTTACTTACTATTTCAGTCAAAACCTCAGTAGGTCCTACCAATTTACGAATAGAATTTCAAGGTGGTAAATTCCGTCTGGATTCTGTTATCTGCATCCGATCAAGGCTCCAGCAATTTGACAGTGTGGTTCACCTAATTGAATATTATGTCCTTATGTGCAAGGAC…
RSAD01017756.1+RSAD01282604.1	Hydrophis_hardwickii	SOCS2	ATGACCCTGCGCTCGGCCGAATCTTCGGATGGCACCGACAGAGCTGGGCCCCAGTGGGAAGCTGGAGGAGCTTCGGCGGAACCTGCTGAAGGGGAACGCCTGGACTCTGCCATGAGGGAGTTGAGATGCGCGGGATGGTATTGGGGAAGCATGACTGTTGCAGAAGCAAAGGAAAGATTACAAGATGCATCTGAAGGGACTTTCTTGGTCAGAGACAGCTCTCACTCAGAGTATTTACTTACTATTTCAGTCAAAACCTCAGTAGGTCCTACCAATTTACGAATAGAATTTCAAGGTGGTAAATTCCGTCTGGATTCTGTTATCTGCATCCGATCAAGGCTCCAGCAATTTGACAGTGTGGTTCACCTAATTGAATATTATGTCCTTATGTGCAAGGAC…
MDXI01017587.1	Malaclemys_terrapin	SOCS2	ATGACCCTGCGCTCTTCCGAGTCCTCGGATGGCGCGGAGCGGGCCGGGACCGAGTGGCGGGGTCCCGGGGCTGAGGTGACCGAGAGGGCGGCGGCGGAGCGCCTGGTCGCGGCCATGGAGGAGCTGAGGCGGGCAGGGTGGTACTGGGGCAGTATGAATGTTGCTGAAGCCAAAGAGAGATTACAAGATACTCCTGAAGGTACTTTCTTGGTTAGAGACAGCTCCCATTCAGAGTATCTACTGACTATCTCCGTAAAAACATCAGCTGGACCAACCAATCTGCGTATCGAGTATCAAGACGGCAAATTCAGACTGGACTCCATCATATGTGTCAGATCTCGGCTTAAACAATTTGATAGTGTGGTCCATCTGATTGAATACTACGTTCTTACATGCAAG…
AZIM01002964.1	Ophiophagus_hannah	SOCS2	ATGACCCTGCGCTCGGCCGAATCTTCGGATGGCACCGACAGGGCTGGGCCCCAGTGGGAAGCTGGAGGAGCTTCGGCGGAACCTGCTGAAGGGGAGCGCCTGGACTCTGCCATGAGGGAGTTGAGATGCGCGGGATGGTATTGGGGAAGCATGAGTGTTGCAGAAGCAAAGGAAAGATTACAAGATGCATCAGAAGGGACTTTCTTGGTCAGAGATAGCTCTCACTCAGAGTATTTACTTACTATTTCAGTCAAAACCTCAGTAGGTCCTACCAATTTACGAATAGAATTTCAAGGTGGTAAATTCCGTCTGGATTCTGTTATCTGCATCCGATCAAGGCTCCAACAATTTGACAGTGTGGTTCACCTAATTGAATATTATGTCCTTATGTGCAAGGAC…
JTLQ01285215.1	Pantherophis_guttatus	SOCS2	ATGACCCTGCGCTCGGCCGAATCCTCGGATGGCACCGACAGGGCTGGGCCCCAGTGGGAAGCTGGAGGAGCTTCGGCGGAACCTGCTGAAAGGGAGCGTCTGGACTCTGCCATGAGGGAGTTGAGATGCGCGGGATGGTATTGGGGAAGCATGAATGTTGCAGAAGCAAAGGAAAGATTACAAGATACATCTGAAGGGACTTTCTTGGTCAGAGACAGCTCTCACTCAGAGTATTTACTTACCATTTCAGTTAAAACCTCTGTAGGTCCTACCAACTTACGAATAGAATTTCAAGGTGGTAAATTCCGTCTGGATTCTGTTATCTGCATCCGATCAAGGCTCCAGCAATTTGACAGTGTGGTTCATCTAATTGAATATTATGTCCTTATGTGCAAGGAC…
QXTE01000128.1	Platysternon_megacephalum	SOCS2	ATGACCCTGCGCTCTTCCGAGTCCTCGGATGGCGCGGAGCGGGCCGGGACCGAGTGGCGGGGTCCCGGGGCTGAGGTGACCGAGAGGGCGGCGGCGGAGCGCCTGGCCGCGGCCATGGAGGAGCTGAGGCGGGCAGGGTGGTACTGGGGCAGTATGAATGTTGCTGAAGCCAAAGAGAGATTACAAGATACTCCTGAAGGTACTTTCTTGGTTAGAGACAGCTCCCATTCGGAGTATCTACTGACTATCTCGGTAAAAACATCAGCTGGACCAACCAATCTGCGTATTGAGTATCAAGACGGCAAATTCAGACTGGACTCCATCATATGTGTCAGATCTCGGCTTAAACAATTTGATAGCGTGGTCCATCTGATTGAATACTACGTTCTTACATGCAAG…
BFFQ01005596.1	Protobothrops_flavoviridis	SOCS2	ATGACCCTGCGCTCGGCCGAATCCTCGGATGGCACCGACAGGGCTGGGGCCGAGTGGGAAGCTGGAGGAGCCGCGGCGGAACCTGCTGAAGGGGAACGCCTGGACTCTGCCATGCGGGAGTTGAGATGCGCGGGATGGTATTGGGGAAGCATGAGTGTTGCAGAAGCAAAGGAAAGATTACAAGAAACATCTGAAGGGACTTTCTTGGTCAGAGACAGCTCTCACTCAGAATATTTACTTACTATTTCAGTCAAAACCTCAGTAGGTCCTACCAACTTACGAATAGAATTTCAAGGTGGTAAATTCAGTCTGGATTCTGTTATCTGCATTCGATCAAGACTCCAGCAATTTGACAGTGTGGTTCACCTAATTGAATATTATGTCCTTATGTGCAAGGAT…
QLTV01000769.1	Thermophis_baileyi	SOCS2	ATGACCCTGCGCTCGGCCGAATCCTCGGATGGCACCGACAGGGCTGGGCCCCAGTGGGAAGCTGGAGGAGCCTCGGCGGAACCTGCTGAAGGGGAGCGCCTGGACTCTGCCATGAGGGAGTTGAGATGCGCGGGATGGTATTGGGGAAGCATGAGTGTTGCAGAAGCAAAGGAAAGATTACAAGATACATCTGAAGGGACTTTCTTGGTCAGAGACAGCTCTCACTCAGAGTATTTACTTACTATTTCAGTTAAAACCTCAGTAGGTCCTACCAACTTACGAATAGAATTTCAAGGTGGTAAATTCCGTCTGGATTCTGTTATCTGCATCCGATCAAGGCTCCAGCAATTTGACAGTGTGGTTCATCTAATTGAATATTATGTCCTTATGTGCAAGGAC…
KN623532.1	Vipera_berus	SOCS2	ATGACCCTGCGCTCGGCCGAATCCTCGGATGGCGCCGACAGGGCTGGGGCCGAGTGGGAAGCTGGAAGAGCCGCGGCGGAACCTGCTGAAGGGGAGCGCCTGGACTCCGCCATGCGGGAGTTGAGATGCGCGGGATGGTATTGGGGAAGCATGAGTGTTGCAGAAGCAAAGGAAAGATTACAAGAAACATCTGAAGGGACTTTCTTGGTCAGAGACAGCTCTCACTCAGAGTATTTACTTACTATTTCAGTCAAAACCTCTGTAGGTCCTACCAACTTACGAATAGAATTTCAGGATGGGAAATTCCGTCTGGATTCTGTTATCTGCATTCGATCAAGACTCCAGCAATTTGACAGTGTGGTTCAGCTAATTGAATATTATGTCCTTATGTGCAAGGAT…
XM_026654529.1	Terrapene_mexicana_triunguis	SOCS3	ATGGTCACACACAGCAAGTTCCCCGCTGCTGGGATGAGCCGCCCGCTGGACACCAGCCTGCGCCTCAAGACCTTCAGCTCCAAGAGCGAGTACCAGCTGGTGGTGAACGCTGTGCGCAAGCTGCAGGAGAGTGGCTTCTACTGGAGCGCAGTAACAGGCGGCGAGGCCAACCTGCTGCTGAGCGCCGAGCCGGCTGGCACCTTCCTCATCAGAGACAGCTCCGACCAGCGGCACTTCTTCACCCTCAGTGTCAAGACTGAGTCGGGCACCAAGAACCTGCGCATCCAATGCGAGGGCGGCAGCTTCTCTCTGCAGAGTGACCCCCGCAGCAGCCAGCCCGTGCCCCGCTTTGACTGCGTCCTCAAGCTGGTGCATCACTACATGCCTCCTTCCCCGTGT…
XM_020814037.1	Pogona_vitticeps	SOCS3	ATGGTCACCCACAGCAAGTTCCCCAGCGCCGGGATGAGCCACCCGCTGGACTCCAGCCTGCGCCTCAAGACCTTCAGCTCCAAGAGCGAGTACCAGCTGGTGGTGAACGCGGTGCGCAAGTTGCAGGAGAGCGGCTTCTACTGGAGCACGGTGACGGGGGGCCAAGCCAACCTCTTGCTCAGCGCCGAGCCTACGGGCACGTTCCTCATCCGGGACAGCTCAGACCAGCGCCACTTCTTCACGCTGAGCGTCAAGACGGAGAGTGGCACCAAAAACCTCCGGATCCAGTGCGAAGGGGGCAGCTTCTCGCTCCAGAGCGACCCCCACAGCAGCCAGCCTGTGCCCCGCTTTGACTGTGTCCTGAAACTGGTCCATCACTACATGCCCTTCCCCGAGCAA…
XM_015818893.1	Protobothrops_mucrosquamatus	SOCS3	ATGGTCACCCACAGCAAGTTCCCCAGTGCCGGGATGAGCCACCCGCTGGACACCAGCCTGCGCCTCAAGACGTTCAGTTCCAAGAGCGAATATCAGCTGGTGGTGAATGCTGTGCGCAAGCTGCAGGAGAGTGGCTTCTACTGGAGCACGGTGACAGGTGGTCAGGCCAACCTGCTCCTGAGCGCTGAACCCATCGGCACCTTCCTCATCCGTGACAGCTCAGACCAGCGCCACTTCTTCACTCTGAGCGTCAAGACTGAGTCAGGCACCAAAAACTTGCGGATCCAGTGTGAAGGAGGTAGCTTCTCACTCCAGAGTGATCCGCACAGCAGCCAGCCTGTGCCCCGCTTTGACTGTGTTCTCAAACTTGTTCATCACTACATGCCCCTCCCTGAGCAA…
XM_015416996.1	Gekko_japonicus	SOCS3	ATGGTCACCCACAGCAAGTTCCCCAGCGCCGGGATGAGCCACCCGCTGGACACCAGCCTGCGCCTCAAGACGTTCAGCTCCAAGAGCGAGTACCAGCTGGTGGTGAACGCCGTGCGCAAGCTGCAGGAGAGCGGCTTCTACTGGAGCGCCGTGACCGGCGGCCAAGCCAACCTGCTGCTCAGCGCCGAGCCTACCGGCACCTTCCTCATCCGGGACAGCTCCGACCAGCGCCACTTCTTCACCCTCAGCGTCAAGACCGAGTCCGGCACCAAGAACCTGCGGATCCAGTGCGAGGGGGGCAAGTTCTCCCTCCAGAGCGACCCCCACAGCAGCCAGCCGGTGCCTCGCTTCGACTGTGTCCTCAAGCTGGTCCATCACTACATGCCCCTCCCGGAGCAG…
XM_007428502.2	Python_bivittatus	SOCS3	ATGGTCACCCACAGCAAGTTCCCCAGTGCCGGGATGAGCCACCCGCTGGACACCAGCCTGCGCCTCAAGACATTCAGCTCCAAGAGCGAGTATCAGCTGGTGGTGAATGCTGTGCGCAAGCTGCAAGAGAGCGGCTTCTACTGGAGCACGGTGACAGGTGGCCAAGCCAACCTGCTCCTGAGCTCTGAACCCATCGGCACCTTCCTCATCCGTGACAGCTCAGACCAGCGCCACTTCTTCACTCTGAGCGTCAAGACTGAGTCAGGCACCAAAAACTTGCGGATCCAGTGTGAAGGAGGCAGCTTCTCACTCCAGAGTGACCCGCACAGCAGCCAACCTGTGCCCCGCTTTGACTGTGTTCTCAAACTCGTTCATCACTACATGCCCCTCCCTGAGCAA…
XM_007063351.2	Chelonia_mydas	SOCS3	ATGGTCACCCACAGCAAGTTCCCCGCTGCTGGGATGAGCCGCCCGCTGGACACCAGCCTGCGCCTCAAGACTTTCAGCTCCAAGAGCGAGTACCAGCTGGTGGTGAACGCCGTGCGCAAGCTGCAGGAGAGCGGCTTCTACTGGAGCACGGTAACGGGCAGCGATGCCAACCTGCTGCTGAGTGCGGAGCCGGCCGGCACCTTCCTCATCAGAGACAGCTCCGACCAGCGGCACTTCTTCACCCTCAGCGTCAAGACGGAGTCGGGCACCAAGAACCTGCGCATCCAGTGCGAGGGCGACAGCTTCTCTCTGCAGACCGACCCCCGCAGCAGCCAGCCCGTGCCCCGCTTCGACTGCGTCCTCAAGCTGGTGCATCACTACATGCCTCCCTCCCCGTGT…
XM_005283042.2	Chrysemys_picta_bellii	SOCS3	ATGGTCACGCACAGCAAGTTCCCCGCTGCTGGGATGAGCCGCCCGCTGGACACCAGCCTGCGCCTCAAGACCTTCAGCTCCAAGAGCGAGTACCAGCTGGTGGTGAACGCTGTGCGCAAGCTGCAGGAGAGTGGCTTCTACTGGAGCGCAGTAACAGGCGGCGAGGCCAACCTGCTGCTGAGCGCCGAGCCGGCTGGCACCTTCCTCATCAGAGACAGCTCCGACCAGCGGCACTTCTTCACCCTCAGTGTCAAGACGGAGTCGGGCACCAAGAACCTGCGCATCCAGTGCGAGGGCGGCAGCTTCTCTCTGCAGAGCGACCCCCGCAGCAGCCAGCCCGTGCCCCGCTTCGACTGCGTCCTCAAGCTGGTGCATCACTACATGCCTCCTTCCCCGTGT…
XM_008104197.2	Anolis_carolinensis	SOCS3	ATGGTCACCCACCGAAAGTTCCCCAGCGCTGCCGGGATGAGCCACCCGCTGGACACCAGCCTGCGCCTCAAGACCTTCAGCTCCAAGAGCGAGTACCAGCTGGTGGTGAATGCGGTGCGCAAGCTCCAGGAGAGCGGCTTCTACTGGAGTGCGGTGACGGGCGGCCAGGCCAACCTGCTGCTCAGCGCTGAGCCCACCGGCACCTTCCTCATCCGCGACAGCTCGGACCAGCGCCACTTCTTCACCCTCAGCGTCAAGACCGAGTCCGGCACCAAGAACCTGCGCATCCAGTGTGAGGGAGGCAGCTTCTCGCTCCAGAGCGACCCCCACAGCAGCCAGCCCGTCCCCCGCTTCGACTGCGTCCTCAAGCTGGTCCGCCACTACATGCCGCTCCCCGAG…
XM_014052952.1	Thamnophis_sirtalis	SOCS3	ATGGTCACCCACAGCAAGTTCCCCACTACCGGGATGAGCCACCCGCTGGACACCAGCCTGCGCCTCAAGACGTTCAGTTCCAAGAGCGAATATCAGCTGGTGGTGAACGCTGTGCGCAAGCTGCAGGAGAGCGGCTTCTACTGGAGCACGGTGACAGGTGGTCAAGCCAACCTGCTCCTGAGCTCCGAGCCTATTGGCACCTTCCTCATCCGTGACAGCTCAGACCAGCGCCACTTCTTCACTCTAAGCGTGAAGACTGAGTCAGGCACCAAAAACCTGCGGATCCAGTGTGAAGGAGGCAGCTTCTCACTCCAGAGTGATCCGCACAGCAGCCACCCTGTGCCCCGCTTTGACTGTGTTCTCAAACTCGTCCATCACTACATGCCCCTCCCTGAGCCA…
XM_026701825.1	Pseudonaja_textilis	SOCS3	ATGGTCACCCACAGCAAGCTCCCCAGTACAGGGATGAGCCACCCGCTGGACACCAGCCTGCGCCTCAAAACGTTCAGTTCCAAGAGCGAATATCAGCTGGTGGTGAACGCTGTGCGCAAGCTGCAGGAGAGTGGCTTCTACTGGAGCACGGTGACAGGAGGTCAAGCCAACCTGCTCCTCAGCTCTGAACCCATTGGCACCTTCCTCATCCGTGACAGCTCAGACCAGCGCCACTTCTTCACTCTGAGCGTCAAGACTGAGTCGGGCACCAAGAACCTACGGATCCAGTGTGAAGGAGGCAGCTTCTCACTCCAGAGTGATCCCCACAGCAGCCACCCTGTGCCCCGCTTTGACTGTGTCCTCAAACTCGTTCATCACTACATGCCCCTCCCTGAGCAA…
XM_026667297.1	Notechis_scutatus	SOCS3	ATGGTCACCCACAGCAAGCTCCCCAGTACAGGGATGAGCCACCCGCTGGACACCAGCCTGCGCCTCAAAACGTTCAGTTCCAAGAGCGAATATCAGCTGGTGGTGAACGCTGTGCGCAAGCTGCAGGAGAGTGGCTTCTACTGGAGCACGGTGACAGGAGGTCAAGCCAACCTGCTCCTCAGCTCCGAACCCATCGGCACCTTCCTCATCCGTGACAGCTCAGACCAGCGCCACTTCTTCACTCTGAGCGTCAAGACTGAGTCGGGCACCAAGAACCTACGGATCCAGTGTGAAGGAGGCAGCTTCTCACTCCAGAGTGATCCCCACAGCAGCCACCCTGTGCCCCGCTTTGACTGTGTCCTCAAACTCGTTCATCACTACATGCCCCTCCCTGAGCAA…
XM_019542245.1	Crocodylus_porosus	SOCS3	ATGGTGACCCAGAGCAAGCCCCCCGGCATGAGCGGCCCGAGCCGCGCGGCCGACGCCGGCCTGCGCCTCAAGACCTTCCGCTCGGCCGGCGAGTACCAGCTGGTGCTGGAGGCGGCGCGCAAGCTGCAGGAGAGCGGCTTCTACTGGAGCGCCGTGTCGGGCGGCGAGGCCAACGCGCTGCTGCGCGCCGAGCCGGCCGGCACCTTCCTCATCCGCGACAGCTCGGACCAGCGCCACCTCTTCACGCTCAGCGTCAAGACCGAGGCGGGCACCAAGAACCTGCGCATCCAGTGCGAGGGCGGCAGCTTCGCGCTGCAGAGCGACCCGCGCGGCCAGCCCGTGCCGCGCTTCGACTGCGTGCTCAAGCTGGTGCAGCACTACATGCCGCGCCGGCCGCAG…
PKMU01004323.1	Chelonoidis_abingdonii	SOCS3	ATGGTCACGCACAGCAAGTTCCCCGCTGCTGGGATGAGCCGCCCGCTGGACACCAGCCTGCGCCTCAAGACCTTCAGCTCCAAGAGCGAGTACCAGCTGGTGGTGAACGCTGTGCGCAAGCTGCAGGAGAGTGGCTTCTACTGGAGCGCAGTAACAGGCGGCGAAGCCAACCTGCTGCTGAGCACAGAGCCGGCTGGCACCTTCCTCATCAGAGACAGCTCCGACCAGCGGCACTTCTTCACCCTCAGTGTCAAGACTGAGTCGGGCACCAAGAACCTGCGCATCCAATGTGAGGGTGGCAGCTTCTGTCTGCAGAGTGACCCCCGCAGCAGCCAGCCCGTGCCCCGCTTCGACTGTGTCCTCAAGCTGGTGCATCACTACATGCCTCCTTCCCTGTGT…
LVCR01002436.1	Crotalus_horridus	SOCS3	ATGGTCACCCACAGCAAGTTCCCCAGTGCCGGGATGAGCCACCCGCTGGACACCAGCCTGCGCCTCAAGACGTTCAGTTCCAAGAGTGAATATCAGCTGGTGGTGAACGCTGTGCGCAAGCTGCAGGAGAGTGGCTTCTACTGGAGCACGGTGACAGGTGGTCAGGCCAACCTGCTCCTGAGCGCTGAACCCATCGGCACCTTCCTCATCCGTGACAGCTCAGACCAGCGCCACTTCTTCACTCTGAGCGTCAAGACTGAGTCAGGCACCAAAAACTTGCGGATCCAGTGTGAAGGAGGTAGCTTCTCACTCCAGAGTGATCCGCACAGCAGCCAGCCTGTGCCCCGCTTTGACTGTGTTCTCAAACTTGTTCATCACTACATGCCCCTCCCTGAGCAA…
JPMF01097758.1	Crotalus_pyrrhus	SOCS3	ATGGTCACCCACAGCAAGTTCCCCAGTGCCGGGATGAGCCACCCGCTGGACACCAGCCTGCGCCTCAAGACGTTCAGTTCCAAGAGTGAATATCAGCTGGTGGTGAATGCTGTGCGCAAGCTGCAGGAGAGTGGCTTCTACTGGAGCACGGTGACAGGTGGTCAGGCCAACCTGCTCCTGAGCGCTGAACCCATTGGCACCTTCCTCATCCGTGACAGCTCAGACCAGCGCCACTTCTTCACTCTGAGCGTCAAGACTGAGTCAGGCACCAAAAACTTGCGGATCCAGTGTGAAGGAGGTAGCTTCTCACTCCAGAGTGATCCGCACAGCAGCCAGCCTGTGCCCCGCTTTGACTGCGTTCTCAAACTTGTTCATCACTACATGCCCCTCCCTGAGCAA…
PDHV01007694.1	Crotalus_viridis	SOCS3	ATGGTCACCCACAGCAAGTTCCCCAGTGCCGGGATGAGCCACCCGCTGGACACCAGCCTGCGCCTCAAGACGTTCAGTTCCAAGAGTGAATATCAGCTGGTGGTGAATGCTGTGCGCAAGCTGCAGGAGAGTGGCTTCTACTGGAGCACGGTGACAGGTGGTCAGGCCAACCTGCTCCTGAGCGCTGAACCCATCGGCACCTTCCTCATCCGTGACAGCTCAGACCAGCGCCACTTCTTCACTCTGAGCGTCAAGACTGAGTCAGGCACCAAAAACTTGCGGATCCAGTGTGAAGGAGGTAGCTTCTCACTCCAGAGTGATCCGCACAGCAGCCAGCCTGTGCCCCGCTTTGACTGCGTTCTCAAACTTGTTCATCACTACATGCCCCTCCCTGAGCAA…
ML123463.1	Cuora_mccordi	SOCS3	ATGGTCACGCACAGCAAGTTCCCCGCTGCTGGGATGAGCCGCCCGCTGGACACCAGCCTGCGCCTCAAGACCTTCAGCTCCAAGAGCGAGTACCAGCTGGTGGTGAGCGCGGTGCGCAAGCTGCAGGAGAGTGGCTTCTACTGGAGCGCAGTAACAGGCGGCGAGGCCAACCTGCTGCTGAGCACAGAGCCGGCTGGCACCTTCCTCATCAGAGACAGCTCCGACCAGCGGCACTTCTTCACCCTCAGTGTCAAGACTGAGTCAGGCACCAAGAACCTGCGCATCCAATGTGAGGGCGGCAGCTTCTCTCTGCAGAGCGACCCCCGCAGCAGCCAGCCCGTGCCCCGCTTCGACTGCGTCCTCAAGCTGGTGCATCACTACATGCCTCCTTCCCCGTGT…
PPEB01004483.1	Gopherus_agassizii	SOCS3	ATGGTCACGCACAGCAAGGTCCCCGCTGCTGGGATGAGCCGCCCGCTGGACACCAGCCTGCGCCTCAAGACCTTCAGCTCCAAGAGCGAGTACCAGCTGGTGGTGAACGCTGTGCGCAAGCTGCAGGAGAGTGGCTTCTACTGGAGCGCAGTAACAGGCGGCGAGGCCAACCTGCTGCTGAGCACAGAGCCGGCTGGCACCTTCCTCATCAGAGACAGCTCCGACCAGCGGCACTTCTTCACCCTCAGCGTCAAGACTGAGTCGGGCACCAAGAACCTGCGCATCCAATGTGAGGGTGGCAGCTTCTCTCTGCAGAGCGACCCCCGCAGCAGCCAGCCTGTGCCCCGCTTCGACTGTGTCCTCAAGCTGGTGCATCACTACATGCCTCATTCTCCGTGT…
RSAE01184657.1	Hydrophis_cyanocinctus	SOCS3	ATGGTCACCCACAGCAAGCTCCCCAGTACAGGGATGAGCCACCCGCTGGACACCAGCCTGCGCCTCAAAACATTCAGTTCCAAGAGTGAATATCAGCTGGTGGTGAACGCTGTGCGCAAGCTGCAGGAGAGTGGCTTCTATTGGAGCACGGTGACAGGAGGTCAAGCCAACCTGCTCCTCAGCTCCGAACCCATCGGCACCTTCCTCATCCGTGACAGCTCAGACCAGCGCCACTTCTTCACTCTGAGCGTCAAGACTGAGTCGGGCACCAAGAACCTACGGATCCAGTGTGAAGGAGGCAGCTTCTCACTCCAGAGTGATCCCCACAGCAGCCACCCTGTGCCCCGCTTTGACTGTGTCCTCAAACTCGTTCATCACTACATGCCCCTCCCTGAGCAA…
RSAD01007000.1	Hydrophis_hardwickii	SOCS3	ATGGTCACCCACAGCAAGCTCCCCAGTACAGGGATGAGCCACCCGCTGGACACCAGCCTGCGCCTCAAAACATTCAGTTCCAAGAGTGAATATCAGCTGGTGGTGAACGCTGTGCGCAAGCTGCAGGAGAGTGGCTTCTATTGGAGCACGGTGACAGGAGGTCAAGCCAACCTGCTCCTCAGCTCCGAACCCATCGGCACCTTCCTCATCCGTGACAGCTCAGACCAGCGCCACTTCTTCACTCTGAGCGTCAAGACTGAGTCGGGCACCAAGAACCTACGGATCCAGTGTGAAGGAGGCAGCTTCTCACTCCAGAGTGATCCCCACAGCAGCCACCCTGTGCCCCGCTTTGACTGTGTCCTCAAACTCGTTCATCACTACATGCCCCTCCCTGAGCAA…
OFHV01001939.1	Lacerta_bilineata	SOCS3	ATGGTCACCCACAGCAAGTTCCCCAGCGCCGGGATGAGCCACCCGCTGGACACCAGCCTGCGCCTCAAGACTTTCAGCTCCAAGAGCGAATACCAGCTGGTGGTGAACGCTGTGCGCAAGCTGCAGGAGAGCGGCTTCTACTGGAGCGCGGTGACAGGTGGGCAGGCCAACCTGCTGCTAAGTGCCGAGCCCACGGGCACCTTCCTCATCCGAGACAGTTCGGACCAGCGGCACTTCTTCACCCTCAGCGTCAAGACCGAGTCGGGCACCAAAAACCTGCGGATCCAGTGCGAGGGGGGCACCTTCTCCCTCCAGAGCGACCCTCACAGCAGCCAGCCCGTGCCTCGCTTTGACTGCGTCCTGAAGCTGGTCCATCACTACATGCCCCTCCCCGAGCAA…
OFHU01001913.1	Lacerta_viridis	SOCS3	ATGGTCACCCACAGCAAGTTCCCCAGCGCCGGGATGAGCCACCCGCTGGACACCAGCCTGCGCCTCAAGACTTTCAGCTCCAAGAGCGAATACCAGCTGGTGGTGAACGCTGTGCGCAAGCTGCAGGAGAGCGGCTTCTACTGGAGCGCGGTGACAGGTGGGCAGGCCAACCTGCTGCTAAGTGCCGAGCCCACGGGCACCTTCCTCATCCGAGACAGTTCGGACCAGCGGCACTTCTTCACCCTGAGCGTCAAGACCGAGTCGGGCACCAAAAACCTGCGGATCCAGTGCGAGGGGGGGACCTTCTCCCTCCAGAGCGACCCTCACAGCAGCCAGCCCGTGCCTCGCTTTGACTGCGTCCTGAAGCTGGTCCATCACTACATGCCCCTCCCCGAGCAA…
MDXI01005862.1	Malaclemys_terrapin	SOCS3	ATGGTCACGCACAGCAAGTTCCCCGCTGCTGGGATGAGCCGCCCGCTGGACACCAGCCTGCGCCTCAAGACCTTCAGCTCCAAGAGCGAGTACCAGCTGGTGGTGAACGCTGTGCGCAAGCTGCAGGAGAGTGGCTTCTACTGGAGTGCAGTAACAGGCGGCGAAGCCAACCTGCTGCTGAGCGCCGAGCCGGCTGGCACCTTCCTCATCAGAGACAGCTCCGACCAGCGGCACTTCTTCACCCTCAGTGTCAAGACTGAGTCGGGCACCAAGAACCTGCGCATCCAGTGCGAGGGCGGCAGCTTCTCTCTGCAGAGCGACCCCCGCAGCAGCCAGCCCGTGCCCCGCTTCGACTGCGTCCTCAAGCTGGTGCATCACTACATGCCTCCTTCCCCGTGT…
AZIM01000015.1	Ophiophagus_hannah	SOCS3	ATGGTCACCCACAGCAAGTTCCCCAGTACAGGGATGAGCCACCCGCTGGACACCAGCCTGCGCCTCAAGACGTTCAGTTCCAAGAGCGAATATCAGCTGGTGGTGAACGCTGTGCGCAAGCTGCAGGAGAGTGGCTTCTACTGGAGCACGGTGACAGGAGGTCAAGCCAACCTGCTCCTCAGCTCCGAACCCATCGGCACCTTCCTCATCCGTGACAGCTCAGACCAGCGCCACTTCTTCACTCTGAGTGTCAAGACTGAGTCAGGCACCAAAAACCTACGGATCCAGTGTGAAGGAGGCAGCTTCTCGCTCCAGAGTGATCCCCACAGCAGCCATCCTGTGCCCCGCTTTGACTGTGTTCTCAAACTCGTTCATCACTACATGCCGCTCCCTGAGCAA…
JTLQ01078526.1	Pantherophis_guttatus	SOCS3	ATGGTCACCCACAGCAAGTTCCCCAGTACCGGGATGAGCCACCCGCTGGACACCAGCCTGCGCCTCAAGACGTTCAGATCCAAGAGCGAATATCAGCTGGTGGTGAATGCTGTGCGCAAGCTGCAGGAGAGTGGCTTCTACTGGAGCACGGTGACAGGTGGTCAAGCCAACCTGCTCCTGAGCTCTGAACCCATCGGCACCTTCCTCATCCGTGACAGCTCAGACCAGCGCCACTTCTTCACTCTGAGCGTGAAGACTGAGTCAGGCACCAAAAACTTGCGGATCCAGTGTGAAGGAGGCAGCTTCTCTCTCCAGAGTGATCCACATAGCAGCCACCCTGTGCCTCGATTTGACTGTGTTCTCAAACTCGTTCATCACTACATGCCCCTCCCTGAGCAA…
BDOT01000098.1	Paroedura_picta	SOCS3	ATGGTCACCCACAGCAAGTTCCCCAGCGCCGGGATGAGCCACCCGCTGGACACCAGCCTGCGCCTCAAGACTTTCAGCTCCAAGAGCGAGTACCAGCTGGTGGTGAACGCCGTGCGCAAGCTGCAGGAGAGCGGCTTCTACTGGAGCACGGTGACGGGCGGCCAAGCCAACCTGCTCCTGAGCACCGAGCCCACCGGGACCTTCCTCATCCGGGACAGCTCCGACCAGCGGCACTTCTTCACCCTGAGCGTCAAGACTGAGTCGGGCACCAAGAACCTGCGGATCCAGTGCGAAGGGGGCACCTTCTCCCTCCAGAGCGACCCCCACAGTAGCCAGCCCGTGCCTCGCTTTGACTGCGTCCTCAAGCTGGTCCATCACTACATGCCCCTCCCCGAGCAG…
QXTE01000107.1	Platysternon_megacephalum	SOCS3	ATGGTCACGCACAGCAAGTTCCCCGCTGCTGGGATGAGCCGCCCGCTGGACACCAGCCTGCGCCTCAAGACCTTCAGCTCCAAGAGCGAGTACCAGCTGGTGGTGAACGCTGTGCGCAAGCTGCAGGAGAGTGGCTTCTACTGGAGCGCAGTAACAGGGGGCGAGGCCAACCTGCTGCTGAGCGCGGAGCCGGCTGGCACCTTCCTCATCCGAGACAGCTCCGACCAGCGGCACTTCTTCACCCTCAGTGTCAAGACTGAGTCGGGCACCAAGAACCTGCGCATCCAATGCGAGGGCGGCAGCTTCTCTCTGCAGAGCGACCCCCGCAGCAGCCAGCCTGTGCCCCGCTTCGACTGCGTCCTCAAGCTGGTGCATCACTACATGCCGCCTTCCCCGTGT…
CM014744.1	Podarcis_muralis	SOCS3	ATGGTCACCCACAGCAAGTTCCCCAGCGCCGGGATGAGCCACCCGCTGGACACCAGCCTGCGCCTCAAGACTTTCAGCTCCAAGAGCGAATACCAGCTGGTGGTGAACGCTGTGCGCAAGCTGCAGGAGAGCGGCTTCTACTGGAGCGCGGTGACAGGTGGGCAGGCCAACCTGCTGCTAAGTGCCGAGCCCACGGGAACCTTCCTCATCCGAGACAGCTCGGACCAGCGGCACTTCTTCACCCTCAGCGTCAAGACCGAGTCGGGCACCAAAAACCTGCGGATCCAGTGCGAGGGGGGCACCTTCTCTCTCCAGAGTGACCCTCACAGCAGCCAGCCCGTGCCTCGCTTTGACTGCGTCCTGAAGCTGGTCCATCACTACATGCCCCTCCCCGAGCAG…
BFFQ01002499.1	Protobothrops_flavoviridis	SOCS3	ATGGTCACCCACAGCAAGTTCCCCAGTGCCGGGATGAGCCACCCGCTGGACACCAGCCTGCGCCTCAAGACGTTCAGTTCCAAGAGCGAATATCAGCTGGTGGTGAATGCTGTGCGCAAGCTGCAGGAGAGTGGCTTCTACTGGAGCACGGTGACAGGCGGTCAGGCCAACCTGCTCCTGAGCGCTGAACCCATCGGCACCTTCCTCATCCGTGACAGCTCAGACCAGCGCCACTTCTTCACTCTGAGCGTCAAGACTGAGTCAGGCACCAAAAACTTGCGGATCCAGTGTGAAGGAGGTAGCTTCTCACTCCAGAGTGATCCGCACAGCAGCCAGCCTGTGCCCCGCTTTGACTGTGTTCTCAAACTTGTTCATCACTACATGCCCCTCCCTGAGCAA…
QVOM02000073.1	Salvator_merianae	SOCS3	ATGGTTACTCACAGCAAGTTCCCCAGTGCCGGGATGAGCCACCCGCTGGACACCAGCCTGCGCCTCAAGACTTTCAGCTCCAAGAGTGAATACCAGCTGGTGGTAAACACGGTGCGCAAGCTGCAGGAGAGCGGCTTCTACTGGAGCACGGTGACGGGAGGAGAAGCCAACCTGCTGCTGAGCGCCGAGCCCACTGGCACCTTCCTCATCCGAGATAGCTCAGACCAGCGCCACTTCTTCACGCTGAGTGTCAAGACGCAGTCTGGCACCAAGAACTTGCGGATCCAGTGTGAAGGGGGCAGCTTCTCCCTCCAGAGCGACCCCCAGAGCAGCCAGCCCGTGCCTCGTTTCGACTGTGTCCTGAAGCTGGTCCAGCACTACATGCCCCTCCCTGAACCA…
QLTV01003388.1	Thermophis_baileyi	SOCS3	ATGGTCACCCACAGCAAGTTCCCCATTACCGGGATGAGCCACCCGCTGGACACCAGCTTGCGCCTCAAGACGTTCAGTTCCAAGAGCGAATATCAGCTGGTGGTGAACGCTGTGCGCAAGCTGCAGGAGAGTGGCTTCTACTGGAGCACAGTGACAGGTGGTCAAGCCAACCTACTCCTGAGCTCTGAGCCCATCGGCACCTTCCTCATCCGTGACAGCTCAGACCAGCGCCACTTCTTCACTCTGAGCGTCAAGACTGAGTCAGGCACCAAAAACTTGCGGATCCAGTGTGAAGGAGGCAGCTTCTCGCTCCAGAGTGATCCGCACAGCAGCCACCCTGTGCCCCGCTTTGACTGTGTTCTCAAACTCGTTCATCACTACATGCCCCTCCCTGAGCAA…
KN638156.1	Vipera_berus	SOCS3	ATGGTCACCCACAGCAAGTTCCCCAGTGCCGGGATGAGCCACCCGCTGGACACCAGCCTGCGCCTCAAGACGTTCAGTTCCAAAAGCGAATATCAGCTGGTGGTGAACGCTGTGCGCAAGCTGCAGGAGAGTGGCTTCTACTGGAGCACGGTGACAGGTGGTCAGGCCAACCTGCTCCTGAGTTCTGAACCCATCGGCACCTTCCTCATCCGTGACAGCTCAGACCAGCGCCACTTCTTCACTCTGAGCGTCAAGACCGAGTCAGGCACCAAAAACTTGCGGATCCAGTGTGAAGGAGGGAGCTTCTCACTCCAGAGTGATCCGCACAGCAGCCAGCCTGTGCCCCGCTTTGACTGTGTTCTCAAACTTGTTCATCACTACATGCCCCTCCCTGAGCAA…
QEPC01011341.1	Sphenodon_punctatus	SOCS3	ATGGTCACCCACAGCAAGTTCCCCGCCACTGCCGGGATGAGCTGCCCGCTGGACACCAGCCTGCGCCTCAAGACCTTCAGCTCCAAGAGCGAGTACCAGCTGGTGGTGAATGCTGTGCGTAAGCTGCAGGAAAGTGGCTTCTACTGGAGCACTGTGACAGGAGGGCAGGCCAACCTGCTGCTTAGCAGTGAGCCCACCGGCACCTTCCTTATCCGGGACAGCTCTGACCAGCGCCACTTCTTCACCCTCAGTGTCAAGACGGAATCGGGCACCAAGAACCTGCGGATCCAATGTGAGGGCGGCAGCTTCTCGCTACAGAGCGACCCTTGCAGCAGCCATCCTGTGCCCCGCTTTGACTGTGTCCTCAAACTGGTCCATCACTACATGCCCCTTCCTGAG…
XM_005315606.3	Chrysemys_picta_bellii	SOCS4	ATGGCGGAAAATAAAGAAAGTAATAGTAAAAATGTCGATGTAAGACCCAAAACCACCCGTAGTAGGAGCGCAGACAGAAAGGATGGTTATGTGTGGAGTGGAAAGAAGCTCTCATGGTCTAAAAAGAATGAGAATTGTTCTGATGGTGAAGCAGCAAGTAGTGTAGAAAAACCAGCGGCTGGTTTAAGGAGTCAAGAGAGGAAGCACAGCTGTTCATCTATTGAACTGGATTTAGATCGTTCATGTGGCCACCGATTTTTAGGCCGGTCTCTTAAACAGAAATTGCAAGATGCTGTGGGACAGTGTTTTCCTATAAAGAATTGTAGCAGTCGGCACTCTTCTGTGCTTCCGTCGAAGAGAAAAATTCATCTCAGTGAATTAATGCTAGATAAGTGTCCT…
XM_006120117.3	Pelodiscus_sinensis	SOCS4	ATGGCAGAAAATAAAGAAAGTAATAGTAAAAATATAGATGTAAGACCTAAAACCACCCGTAGTAGAAGTGCGGACAGAAAGGATGGTTACGTTTGGAGTGGAAAGAAGCTCTCATGGTCAAAAAAGAATGAGAATTGTTCTGATGGTGAAGCAGCAAGTAGTGTAGGAAAACCAGCAACTGGTTTAAGGAGCCAAGAGAGGAAGCACAGCTGTTCAGCTATTGAACTGGATTTAGATCGTTCCTGTGGCCACCGATTTTTAGGCCGATCTCTTAAACAGAAATTGCAAGATGCTGTGGGCCAGTGTTTTCCTATAAGAAATTGTAGCAGTCGGCACTCTTCAGTGCTTCCATCAAAAAGAAAAATTCATATCAGTGAATTAATGCTTGATAAGTGTCCT…
XM_007427365.3	Python_bivittatus	SOCS4	ATGGCAGAAAATAAAGAAAGGAAACCTAAAAATGCAGATGTGAGACCTAAAACCAGTCGGAGTAGGAGTGCAGACAGAAAGGACGGATATGTATGGAGTGGAAAGAAGCTTTCCTGGACGAAAAAGAATGAGAACAGTTCTAATGCTGAAATGGCAAGTACCTCAGGAAAACCTATATTAAGTCTAAGGAATCAGGAGAGGAAACACAGCTGTTCTTCAACTGAGGTGGAATTGGAACATGCATGTGGTCACAGGTTCATAGGCCGTTCTTTTAAACAGAAATTGCAGGATGCGATGGGACAATGTTTCCCCATAAAGAGTTGTAGCACTCGGCATTCTTCAGGGCTTTCATCAAAGAGAAAAATACATATCAGCGAGCTTATGTTGGACAAGTGCCCT…
XM_008118342.2	Anolis_carolinensis	SOCS4	ATGGCAGAAAATAAAGAAAAGAGTTCTAAAAATACCGATGTCCGACCTAAAACGAGCCGGAGCAGAAGTGCAGATAGAAAAGATGGATATGTGTGGAGCGGAAAGAAACTTTCCTGGACAAAAAGGAGAGAGAGCAGTTCTGATGCTGAAACAGCAAGTATCTCAGGGAAATCCTCTTGTGGTTTAAGGAACCAAGAAAGGAAACACAGTTGTTCCTCAACGGAGCTGGACCTGGAACGTTCCTGCGGCCACCGATTCTTAGGCCGTTCCCTTAAACAGAAACTGCAGGATGCTATGGGGCAGTGTTTTCCTATAAAGAACTGCAGCAGCCGGCATTCTTCTGTGCTTCCATCAAAGAGAAAAATACATATCAGCGAGCTTATGCTGGACAGATGTCCT…
XM_014054761.1	Thamnophis_sirtalis	SOCS4	ATGGCAGAAAATAAAGAAAGGAAACCTAAAAATGCAGATGTGAGACCCAAAACCAGCCGGAGTAGAAGTGCAGACAGAAAGGACGGATACGTATGGAGTGGAAAGAAGCTTTCCTGGACAAAAAAGAGTGAGAACAGTTCTAATGCCGAAATGGCAAACGCCTCAGGAATACCTACATTAAGCCTAAGGAACCAGGAGAGAAAACAGAGCTGTTCTTCAGCTGAGATGGAGTTGGAACATGTATGTGGTCACAGGTTCCTAAGCCGTTCTTTTAAACAGAAATTGCAGGATGCGATGGGACAATGTTTTCCCATAAAGAGTTGCAACACTCGGCATTCTTCAGGGCTGTCACCAAAGAGGAAAATACATATCAGTGAGCTTATGCTGGACAAATGCCCT…
XM_014595129.2	Alligator_mississippiensis	SOCS4	ATGGCAGAAAATAAGGAAAGTAATAGTAAAAATGTAGATGTGAGACCGAAAACCAGCCGGAGCAGAAGTGCGGACAGAAAGGATGGCTATGTATGGAGCGGAAAGAAGCTCTCATGGTCCAGAAAGAGTGAGCATTGTTCTGAAACAGAAACAGTAAGTAGTTTAGGCAAGCCAGCAGCTGGTTTGAGGAACCAAGAAAGGAAGCACAGCTGTTCATCTATTGAACTGGAGTTAGATCGTTCATGCGGCCACAGATTTTTAGGGCGGTCTTTTAAACAGAAGTTGCAGGATGCTGTGGGGCAATGCTTTCCTCTAAAGAACTGTAGCAGTCGGCACTCTTCAATGCTTCCATCAAAAAGGAAAATTCATATCAGTGAACTGATGCTAGATAAGTGCCCT…
XM_015414337.1	Gekko_japonicus	SOCS4	ATGGCAGAAAATAAGGAAAGGAATACTAAGAATACAGACGTGAGACCAAAAACCAGCCGGAGCAGAAGCGCAGACAGGAAGGATGGCTATGTATGGAGCAGGAAAAAGCTTTCCTGGTCCAAAAAGAGTGACAGCGGTTCCGATGCTGAAACAGCAAGTACTTCAGGGAAATCTACTTTTAGTTTGAGGAACCAGGAGCGGAAACACAGCTGTTCCTCGACGGAGCTGGACGTGGAACGGTCGTGCGGCCACAGGCTCTTAGGCCGGTCCCTGAAACAGAAACTGCAAGATGCCGTGGGCCAGTGTTTCCCTATCAAGAACTGTAGCAGCCGGCATTCTTCGGTGCTTCCGTCCAAGAGGAAAATCCATATCAGCGAGCTTATGCTGGACAAGTGTCCC…
XM_015822814.1	Protobothrops_mucrosquamatus	SOCS4	ATGGCAGAAAATAAAGAAAGGAAACCTAAAAATGCAGACGTGAGACCCAAAACCAGCCGGAGCAGGAGTGCAGACAGAAAGGATGGATACGTATGGAGTGGAAAGAAGCTTTCCTGGACAAAAAAGAATGAGAACAGTTCTAATGCTGAGATGGCAAATGCCTCAGGAAAACCTACATTAAGTCTAAGGAATCAGGAGAGAAAACAGAGCTGTTTCTCAACTGAGATGGAATTGGAGCATGTATGTGGTCACAGGTTCCTAGGCCGTTCTTTTAAACAGAAACTGCAGGATGCGATGGGACAATGTTTCCCCATAAAGAGTTGTAGCACTCGGCATTCTTCAGGGCTTTCACCAAAGAGAAAAATACATATCAGTGAGCTTATGCTGGACAAATGCCCT…
XM_019518345.1	Gavialis_gangeticus	SOCS4	ATGGCAGAAAATAAGGAAAGTAATAGTAAAAATGTAGATGTGAGACCCAAAACCAGCCGGAGCAGAAGTGCAGACAGAAAGGATGGCTATGTATGGAGCGGAAAGAAGCTCTCGTGGTCCAGAAAGAGTGAGCATTGTTCTGAAGCAGAAACAGTAAGTAGTTTAGGCAAGCCAGCAGCTGGTTTGAGGAACCAAGAAAGGAAGCACAGCTGTTCATCTGTTGAACTGGAGTTAGATCGTTCATGCGGCCACAGATTTTTAGGGCGGTCTTTTAAGCAGAAGTTGCAGGATGCTGTGGGGCAATGCTTTCCTCTAAAGAACTGTAGCAGTCGACATTCTTCAATGCTTCCATCAAAAAGGAAAATTCATATCAGTGAACTGATGCTAGATAAGTGCCCT…
XM_019550974.1	Crocodylus_porosus	SOCS4	ATGGCAGAAAATAAGGAAAGTAATAGTAAAAATGTAGATGTGAGACCCAAAACCAGCCGGAGCAGAAGTGCAGACAGAAAGGATGGCTATGTATGGAGCGGAAAGAAGCTCTCGTGGTCCAGAAAGAGTGAGCATTGTTCTGAAGCAGAAACAGTAAGTAGTTTAGGCAAGCCAGCAGCTGGTTTGAGGAACCAAGAAAGGAAGCACAGCTGTTCATCTGGTGAACTGGAGTTAGATCGTTCATGCGGCCACAGATTTTTAGGGCGGTCTTTTAAGCAGAAGTTGCAGGATGCTGTGGGGCAATGCTTTCCTCTGAAGAACTGTGGCAGTCGGCATTCTTCAATGCTTCCATCAAAAAGGAAAATTCATATCAGTGAACTGATGCTAGATAAGTGCCCT…
XM_020777714.1	Pogona_vitticeps	SOCS4	ATGGCAGAAAATAAAGAGAGGAATCCTAAAAATTCCGATGTGAGACCCAAAACCAGCCGGAGCAGAAGTGCGGACCGGAAAGATGGATATGTATGGAGTGGAAAGAAGCTTTCCTGGACAAAAAGGAGTGAGAGCAGCATGGATGCGGAAACAGCCAGTACCTCAGGAAAGTCCACATTTAGTTTAAGGAGCCAGGAGACAAAGCACAGTTGTTCCTCAACTGAGCTGGACTTGGAACGTTCCTGTGGCCACCGCTTCCTAGGCCGTTCTCTTAAGCAGAAGCTCCAAGACGCGGTGGGACAGTGTTTTCCCATCAAGAATTGTAGCAGCCGGCACTCTGCAGTGCTCCCCTCCAAGAGGAAAATACATATCAGCGAGCTTATGCTTGACAAGTGTCCT…
XM_024208651.1	Terrapene_mexicana_triunguis	SOCS4	ATGGCGGAAAATAAAGAAAGTAATAATAAAAATGTCGATGTAAGACCCAAAACCACCCGTAGTAGGAGTGCAGACAGAAAGGATGGTTATGTGTGGAGTGGAAAGAAGCTCTCATGGTCAAAAAAGAATGAGAATTGTTCTGATGGTGAAGCAGCAAGTAGTGTAGGAAAACCAGCGGCTGGTTTAAGGAGCCAAGAGAGGAAGCACAGCTGTTCATCTATTGAACTGGATTTAGATCGTTCATGTGGCCACCGATTTTTAGGCCGGTCTCTTAAACAGAAATTGCAAGATGCTGTGGGACAGTGTTTTCCTATAAAGAATTGTAGCAGTCGGCACTCTTCAGTGCTTCCATCGAAGAGAAAAATTCATATCAGTGAATTAATGCTAGATAAGTGTCCT…
XM_025203502.1	Alligator_sinensis	SOCS4	ATGGCAGAAAATAAGGAAAGTAATAGTAAAAATGTAGATGTGAGACCGAAAACCAGCCGGAGCAGGAGTGCGGACAGAAAGGATGGCTATGTATGGAGCGGAAAGAAGCTCTCGTGGTCCAGAAAGAGTGAGCATTGTTCTGAAACAGAAACAGTAAGTAGTTTAGGCAAGCCAGCAGCTGGTTTGAGGAACCAAGAAAGGAAGCACAGCTGTTCATCTATTGAACTGGAGTTAGATCGTTCATGCGGCCACAGATTTTTAGGACGGTCTTTTAAACAGAAGTTGCAGGATGCTGTGGGGCAATGCTTTCCTCTAAAGAACTGTAGCAGTCGGCACTCTTCAATGCTTCCATCAAAAAGGAAAATTCATATCAGTGAACTGATGCTAGATAAGTGCCCT…
XM_026670236.1	Notechis_scutatus	SOCS4	ATGGCAGAAAATAAAGAAAGGAAACCTAAAAATGCAGATGTGAGACCCAAAACCAGCCGGAGTAGGAGTGCAGACAGAAAGGACGGATACGTATGGAGTGGAAAGAAGCTTTCCTGGATAAAAAAGAATGAGAACAGTTCTAATGCTGCAATGGCAAACGCCTCAGGAATACCTACATTAAGTCTAAGGAACCAGGAGAGAAAACAGAGCTGTTCCTCAGCTGAGATGGAGTTGGAACATGTATGTGGTCACAGGTTCCTAAGCCGTTCTTTTAAACAGAAATTGCAGGATGCAATGGGACAATGTTTCCCCATAAAGAGTTGTAGCACTCGGCATTCTTCAAGGCTTTCACCCAAGAGAAAAATACATATCAGTGAGCTTATGCTGGACAAATGCCCT…
XM_026698713.1	Pseudonaja_textilis	SOCS4	ATGGCAGAAAATAAAGAAAGGAAACCTAAAAATGCAGATGTGAGACCCAAAACCAGCCGGAGTAGGAGTGCAGACAGAAAGGACGGATATGTATGGAGTGGAAAGAAGCTTTCCTGGATAAAAAAGAATGAGAACAGTTCTAATGCTGCAATGGCAAACGCCTCAGGAATACCTACATTAAGTCTAAGGAACCAGGAGAGAAAGCAGAGCTGTTCCTCAGCTGAGATGGAGTTGGAACATGTATGTGGTCACAGGTTCCTAAGCCGTTCTTTTAAACAGAAATTGCAGGATGCAATGGGACAATGTTTCCCCATAAAGAGTTGTAGCTCTCGGCATTCTTCAAGGCTTTCACCCAAGAGAAAAATACATATCAGTGAGCTTATGCTAGACAAATGCCCT…
XM_027825138.1	Chelonia_mydas	SOCS4	ATGGAGGAAAATAAAGAAAGTAATAGTAAAAATGTCGATGTAAGACCCAAAACCACCCGTAGTAGGAGTGCAGACAGAAAGGATGGTTACGTATGGAGTGGAAAGAAGCTCTCATGGTCAAAAAAGAATGAGAATTGTTCTGATGGTGAAGCAGCAAGTAGTGCAGGAAAACCACTGGCTGGTTTTAGGAACCAAGAGAGGAAGCACAGCTGTTCATCTATTGAACTGGACTTAGATCGTTCATGTGGCCACAGATTTTTAGGCCGGTCTCTTAAACAGAAATTGCAAGATGCTGTGGGACAGTGTTTTCCTATAAAGAATTGTAGCAGTCGGCACGCTTCAGTGCTTCCATCAAAGAGAAAAATTCATATCAGTGAATTAATGCTAGATAAGTGTCCT…
AZIM01000019.1	Ophiophagus_hannah	SOCS4	ATGGCAGAAAATAAAGAAAGGAAACCTAAAAATGCAGATGTGAGACCCAAAACCAGCCGGAGTAGGAGTGCAGACAGAAAGGACGGATACGTATGGAGTGGAAAGAAGCTTTCCTGGATAAAAAAGAATGAGAACGGTTCTAATGCTGAAATGGCAAATGCCTCAGGAATACCTACATTAAGTCTAAGGAACCAGGAGAGAAAACAGAGCTGTTCCTCAGCTGAGATGGAGTTGGAACATGTATGTGGTCACAGGTTCCTAAGCCGTTCTTTTAAACAGAAATTGCAGGATGCAATGGGACAGTGTTTCCCCATAAAGAGTTGTAGCACTCGGCATTCTTCAGGGCTTTCGCCAAAGAGAAAAATACATATCAGTGAGCTTATGCTGGATAAATGCCCT…
BDOT01000729.1	Paroedura_picta	SOCS4	ATGGCAGAAAACAAAGAAAGAATCCCTAAGAATGCTGACGTGAGACCAAAAACCAGCCGGAGTAGAAGTGCAGACAGGAAGGACGGTTATGTATGGAGCAGGAAAAAGCTTTCCTGGTCCAAAAGGAGTGACAGCGGTTCTGACGCTGAAACAGCTAGTACTTCAGGGAAATCTTCTTTTAGTTTGAGGAACCAGGAGCGGAAACACAGCTGTTCCTCGACGGAGCTGGACCTGGAACGGTCGTGCGGCCACCGGTTCTTAGGCCGCTCTCTGAAACAGAAACTGCAGGATGCCGTGGGCCAGTGTTTCCCGATCAAGAACTGTAGCAGCCGGCATTCCTCGGTGCTTCCGTCCAAGCGGAAAATCCATATCAGCGAGCTGATGCTGGACAAGTGCCCC…
BFFQ01000890.1	Protobothrops_flavoviridis	SOCS4	ATGGCAGAAAATAAAGAAAGGAAATCTAAAAATGCAGACGTGAGACCCAAAACCAGCCGGAGCAGGAGTGCAGACAGAAAGGATGGATACGTATGGAGTGGAAAGAAGCTTTCCTGGACAAAAAAGAATGAGAACAGTTCTAATGCTGAGATGGCAAATGCCTCAGGAAAACCTACATTAAGTCTAAGGAATCAGGAGAGAAAACAGAGCTGTTTCTCAACTGAGATGGAATTGGAACATGTATGTGGTCACAGGTTCCTAGGCCGTTCTTTTAAACAGAAACTGCAGGATGCGATGGGACAATGTTTCCCCATAAAGAGTTGTAGCACTCGGCATTCTTCAGGGCTTTCACCAAAGAGAAAAATACATATCAGTGAGCTTATGCTGGACAAATGCCCT…
CM014743.1	Podarcis_muralis	SOCS4	ATGGCAGAAAATAAAGAAAGGAATCCTAAAAATCCAGATGTGAGGCCTAAAACCAGCCGGAGTAGAAGCGCAGACCGAAAGGACGGCTACGTGTGGAGCGGAAAGAAGCTTTCCTGGTCAAAGAGGAGCGAAGGCAGTTCTGACGCTGAAACGGCCAGCACCTCAGGGAAATCCATGTTTAGTTTAAGGAACCAGGAGAGGAAACACAGCTGTTCCTCTACTGAGCTGGACTTGGAGCGTTCCTGCGGCCACAGACTCCTAGGCCGCTCCCTTAAGCAGAAACTGCAGGATGCTGTGGGCCAGTGCTTTCCCATAAAGAACTGCAGCAGTCGACATTCTTCGGTGCTTCCATCCAAGAGAAAGATCCATATCAGCGAGCTCATGCTGGACAAGTGTCCT…
JPMF01004270.1	Crotalus_pyrrhus	SOCS4	ATGGCAGAAAATAAAGAAAGGAAACCTAAAAATGCAGATGTGAGACCCAAAACCAGCCGGAGCAGGAGTGCAGACAGAAAGGATGGATACGTATGGAGTGGAAAGAAGCTTTCCTGGACAAAAAAGAATGAGAACAGTTCTAATGCTGAGATGGCAAATGCCTCAGGAAAACCTACATTAAGTCTAAGGAATCAGGAGAGAAAACAGAGCTGTTTCTCAACTGAGATGGAATTGGAACATGTATGTGGTCACAGGTTCCTAGGCCGTACTTTTAAACAGAAACTGCAGGATGCAATGGGACAATGTTTCCCCATAAAGAGTTGTAGCACTCGGCATTCTTCAGGGCTTTCACCAAAGAGAAAAATACATATCAGTGAGCTTATGTTGGACAAATGCCCT…
JTLQ01125264.1	Pantherophis_guttatus	SOCS4	ATGGCAGAAAATAAAGAAAGAAAACCTAAAAATGCAGATGTGAGACCCAAAACCAGCCGGAGTAGGAGTGCAGACAGAAAGGACGGATATGTATGGAGTGGAAAGAAGCTTTCCTGGACAAAAAAGAATGAGAACAGTTCTAATGCTGAAATGGCAAACGCCTCGGGAATACCTACGTTAAGTCTAAGGAACCAGGAGAGAAAACAGAGCTGTTCCTCAGCTGAGATGGAGTTGGAACATGTATGTGGTCACAGATTCCTAAGCCGTTCTTTTAAACAGAAATTGCAAGATGCGATGGGACAATGTTTCCCCATAAAGAGTTGTAGCATTCGGCATTCTTCAGGGCTTTCACCAAAGAGAAAAATACATATCAGTGAGCTTATGCTGGACAAATGCCCT…
KB930316.1	Apalone_spinifera	SOCS4	ATGGCAGAAAATAAAGAAAGTAATAGTAAAAATATAGATGTAAGACCTAAAACCACCCGTAGTAGGAGTGCGGACAGAAAGGATGGTTATGTTTGGAGTGGAAAGAAGCTCTCATGGTCAAAAAAGAATGAGAACTGTTCTGATGGTGAAGCAGCAAGTAGTGTAGGAAAACCAGCAACTGGTTTAAGGAGCCAAGAGAGGAAGCACAGCTGTTCAGCTATTGAACTGGATTTAGATCGCTCCTGTGGCCACCGATTTTTAGGCCGATCTCTTAAACAGAAATTGCAAGATGCTGTGGGCCAGTGTTTTCCTATAAAAAATTGTAGCAGTCGGCACTCTTCAGTGCTTCCATCAAAAAGAAAAATTCATATCAGTGAATTAATGCTTGATAAGTGTCCT…
KN632974.1	Vipera_berus	SOCS4	ATGGCAGAAAATAAAGAAAGGAAACCTAAAAATGCAGATGTAAGACCCAAAACCAGCCGGAGCAGGAGTGCAGACAGAAAGGATGGATACGTATGGAGTGGAAAGAAGCTTTCCTGGACAAAAAAGAATGAGAACAGTTCTAATGCTGAGATGGCTTCAGGAAAACCTACATTGAGTCTAAGGAATCAGGAGAGAAAACAGAGCTGTTTCTCAACTGAGATGGAATTGGAACATGTATGTGGTCACAGGTTCCTAGGCCGTTCTTTTAAACAGAAATTGCAGGATGCGATGGGACAATGTTTCCCCATAAAGAGTTGTAGCACTCGGCATTCTTCAGGGCTTTCACCAAAGAGAAAAATACATATCAGTGAGCTTATGCTGGACAAATGCCCCTTTCCA…
LVCR01010067.1	Crotalus_horridus	SOCS4	ATGGCAGAAAATAAAGAAAGGAAACCTAAAAATGCAGATGTGAGACCCAAAACCAGCCGGAGCAGGAGTGCAGACAGAAAGGATGGATACGTATGGAGTGGAAAGAAGCTTTCCTGGACAAAAAAGAATGAGAACAGTTCTAATGCTGAGATGGCAAATGCCTCAGGAAAACCTACATTAAGTCTAAGGAATCAGGAGAGAAAACAGAGCTGTTTCTCAACTGAGATGGAATTGGAACATGTATGTGGTCACAGGTTCCTAGGCCGTACTTTTAAACAGAAACTGCAGGATGCGATGGGACAATGTTTCCCCATAAAGAGTTGTAGCACTCGGCATTGTTCAGGGCTTTCACCAAAGAGAAAAATACATATCAGTGAGCTTATGTTGGACAAATGCCCT…
MDXI01008967.1	Malaclemys_terrapin	SOCS4	ATGGCGGAAAATAAAGAAAGTAATAGTAAAAATGTCGATGTAAGACCCAAAACCACCCGTAGTAGGAGCGCAGACAGAAAGGATGGTTATGTGTGGAGTGGAAAGAAGCTCTCATGGTCAAAAAAGAATGAGAATTGTTCTGATGGTGAAGCAGCAAGTAGTGTAGAAAAACCAGCGGCTGGTTTAAGGAGTCAAGAGAGGAAGCACAGCTGTTCATCTATTGAACTGGATTTAGATCGTTCATGTGGCCACCGATTTTTAGGCCGGTCTCTTAAACAGAAATTGCAAGATGCTGTGGGACAGTGTTTTCCTATAAAGAATTGTAGCAGTCGGCACTCTTCAGTGCTTCCGTCGAAGAGAAAAATTCATATCAGTGAATTAATGCTAGATAAGTGTCCT…
ML123136.1	Cuora_mccordi	SOCS4	ATGGCGGAAAATAAAGAAAGTAATAGTAAAAATGTCGATGTAAGACCCAAAACCACCCGTAGTAGGAGTGCAGACAGAAAGGATGGTTATGTATGGAGTGGAAAGAAGCTCTCATGGTCAAAAAAGAATGAGAATTGTTCTGATGGTGAAGCAGCAAGTAGTGTAGGAAAACCAGTGGCTGGTTTAAGGAGCCAAGAGAGGAAGCACAGCTGTTCATCTATTGAACTGGATTTAGATCGTTCATGTGGCCACCGATTTTTAGGCCGGTCTCTTAAACAGAAATTGCAAGATGCTGTGGGACAGTGTTTTCCTATAAAGAATTGTAGCAGTCGGCACTCTTCGGTACTTCCATCAAAGAGAAAAATTCATATCAGTGAATTAATGCTAGATAAGTGTCCT…
OFHU01001938.1	Lacerta_viridis	SOCS4	ATGGCAGAAAATAAAGAAAGGAGTTCTAAAAATCCAGATGTGAGACCTAAAACCAGCCGGAGTAGAAGTGCAGACAGAAAGGACGGCTATGTGTGGAGCGGAAAGAAGCTTTCCTGGTCAAAAAGGAGTGAAGGCAGTTCTGACGCTGAAACGGCCAGCACCTCAGGGAAATCCATGTTTAGTTTAAGGAACCAGGAAGGGAAACACAGCTGTTCCTCTACTGAGCTGGACTTGGAACGTTCCTGTGGCCACAGACTCCTAGGCCGCTCCCTTAAGCAGAAACTGCAGGATGCTGTGGGCCAGTGCTTTCCCATAAAGAACTGCAGCAGTCGACATTCTTCAGTGCTTCCATCAAAGAGAAAGATACATATCAGTGAGCTCATGCTGGACAAGTGTCCT…
OFHV01004062.1	Lacerta_bilineata	SOCS4	ATGGCAGAAAATAAAGAAAGGAGTTCTAAAAATCCAGATGTGAGACCTAAAACCAGCCGGAGTAGAAGTGCAGACAGAAAGGACGGCTATGTGTGGAGCGGAAAGAAGCTTTCCTGGTCAAAAAGGAATGAAGGCAGTTCTGACGCTGAAACGGCCAGCACCTCAGGGAAATCCATGTTTAGTTTAAGGAACCAGGAAGGGAAACACAGCTGTTCCTCTACTGAGCTGGACTTGGAGCGTTCCTGCAGCCACAGACTCCTAGGCCGCTCCCTTAAGCAGAAACTGCAGGATGCTGTGGGCCAGTGCTTTCCCATAAAGAACTGCAGCAGTCGACATTCTTCAGTGCTTCCATCAAAGAGAAAGATACATATCAGTGAGCTCATGCTGGACAAGTGTCCT…
PDHV01008519.1	Crotalus_viridis	SOCS4	ATGGCAGAAAATAAAGAAAGGAAACCTAAAAATGCAGATGTGAGACCCAAAACCAGCCGGAGCAGGAGTGCAGACAGAAAGGATGGATACGTATGGAGTGGAAAGAAGCTTTCCTGGACAAAAAAGAATGAGAACAGTTCTAATGCTGAGATGGCAAATGCCTCAGGAAAACCTACATTAAGTCTAAGGAATCAGGAGAGAAAACAGAGCTGTTTCTCAACTGAGATGGAATTGGAACATGTATGTGGTCACAGGTTCCTAGGCCGTACTTTTAAACAGAAACTGCAGGATGCGATGGGACAATGTTTCCCCATAAAGAGTTGTAGCACTCGGCATTCTTCAGGGCTTTCACCAAAGAGAAAAATACATATCAGTGAGCTTATGTTGGACAAATGCCCT…
PKMU01009722.1	Chelonoidis_abingdonii	SOCS4	ATGGCGGAAAATAAAGAAAGTAATAGTAAAAATGTCGATGTAAGACCCAAAACCACCCGTAGTAGGAGTGCAGACAGAAAGGATGGTTATGTATGGAGTGGAAAGAAGCTCTCATGGTCAAAAAAGAATGAGAATTGTTCTGATGGTGAAGCAGCAAGTAGTGTAGGAAGACCAGTGGCTGGTTTAAGGAGCCAAGAGAGGAAGCACAGCTGCTCATCTATTGAACTGGATTTAGATCGTTCATGTGGCCATCGATTTTTAGGCCGGTCTCTTAAACAGAAATTGCAAGATGCTGTGGGACAGTGTTTTCCTATAAAGAATTGTAGCAGTCGGCACTCTTCGGTACTACCATCAAAGAGAAAAATTCGTATAAGTGAATTAATGCTAGATAAGTGTCCT…
PPEB01001589.1	Gopherus_agassizii	SOCS4	ATGGCGGAAAATAAAGAAAGTAATAGTAAAAATGTCGATGTAAGACCCAAAACCACCCGTAGTAGGAGTGCAGACAGAAAGGATGGTTATGTATGGAGTGGAAAGAAGCTCTCATGGTCAAAAAAGAATGAGAATTGTTCTGATGGTGAAGCAGCAAGTAGTGTAGGAAAACCAGTGGCTGGTTTAAGGAGCCAAGAGAGGAAGCACAGTTGTTCATCTATTGAACTGGATTTAGATCGTTCATGTGGCCACCGATTTTTAGGCCGGTCTCTTAAACAGAAATTGCAAGATGCTGTGGGACAGTGTTTTCCTATAAAGAATTGTAGCAGTCGGCACTCTTCAGTACTTCCATCGAAGAGAAAAATTCATATAAGTGAATTAATGCTAGATAAGTGTCCT…
QEPC01009645.1	Sphenodon_punctatus	SOCS4	ATGGCAGAAAATAAAGAAAACTGCATTAAAAATGTAGATGTGCGACCCAAAACCAGCCGGAGCCGAAGTGCAGACAGAAAAGATGGTTATGTATGGAGTGGAAAGAAGTTGTCCTGGTCCAAAAAGAGTGAGAGCACTTCGGACGCCGAAACAGCCAGTGCTGCGGAAAAACCGCTAGTTGGTTTAAAGAGCCAGGAAAGGAAGCACAGCTGTTCATCATTTGAGCTGGATTTAGATCGTTCATGTGGCCACAGGTTTTTAGGCCGGTCCCTAAAACAGAAGCTGCAAGATGCTGTGGGACAGTGCTTCCCTATAAAGAATTGTAGCAGTCGCCATTCTTCGGTGCTTCCATCAAAAAGGAAAATTCATATCAGTGAACTGATGTTGGACAAGTGTCCT…
QLTV01004082.1	Thermophis_baileyi	SOCS4	ATGGCAGAAAATAAAGAAAGGAAACCTAAAAATGCAGATGTGAGACCCAAAACTAGCCGGAGTAGGAGTGCAGACAGAAAGGACGGATACGTATGGAGTGGAAAGAAGCTTTCCTGGACAAAAAAGAATGAGAACAGTTCTAATGCTGAAATGGCAAACGCCTCAGGAATACCTACATTAAGTCTAAGGAACCAGGAGAGAAAACAGAGCTGTTCCTCAGCTGAGATGGAGTTGGAACATGTATGTGGTCACAGGTTCCTAAGCCGTTCTTTTAAACAGAAATTGCAGGATGCGATGGGACAATGTTTCCCCATAAAGAGTTGTAGCACTCGGCATTCTTCAGGGCTTTCACCAAGGAGGAAAATACATATCAGTGAGCTTATGCTGGACAAATGCCCT…
QXTE01000114.1	Platysternon_megacephalum	SOCS4	ATGGCGGAAAATAAAGAAAGTAATAGTAAAAATGCCGATGTAAGACCCAAAACCACCCGTAGTAGGAGTGCAGATAGAAAGGATGGTTATGTATGGAGTGGAAAGAAGCTCTCATGGTCAAAAAAGAATGAGAATTGTTCTGATGGTGAAGCAGCAAGTAGTGTAGGAAAACCAGCGGCTGGTTTAAGGAGCCAAGAGAGGAAGCACAGCTGTTCATCTATTGAACTGGATTTAGATCGTTCATGTGGCCACCGATTTTTAGGCCGGTCTCTTAAACAGAAATTGCAAGATGCTGTGGGACAGTGTTTTCCTATAAAGAATTGTAGCAGTCGGCACTCTTCGGTGCTTCCATCGAAGAGAAAAATTCATATCAGTGAATTAATGCTAGATAAGTGTCCT…
RSAD01524009.1	Hydrophis_hardwickii	SOCS4	ATGGCAGAAAATAAAGAAAGGAAACCTAAAAATGCAGATGTGAGACCCAAAACCAGCCGGAGTAGGAGTGCAGACAGAAAGGATGGATATGTATGGAGTAGAAAGAAGCTTTCCTGGATAAAAAAGAATGAGAACAGTTCTAATGCTGCAATGGCAAACGTCTCAGGAATACCTACATTAAGTCTAAGGAACCAGGAGAGAAAGCAGAGCTGTTCCTCAGCTGAGATGGAGTTGGAACATGTATGTGGTCACAGGTTCCTAAGCCGTTCTTTTAAACAGAAATTGCAGGATGCAATGGGACAATGTTTCCCCATAAAGAGTTGTAGCACTCGGCATTCTTCAAGGCTTTCACCCAAGAGAAAAATACATATCAGTGAGCTTATGCTGGACAAATGCCCT…
RSAE01083462.1	Hydrophis_cyanocinctus	SOCS4	ATGGCAGAAAATAAAGAAAGGAAACCTAAAAATGCAGATGTGAGACCCAAAACCAGCCGGAGTAGGAGTGCAGACAGAAAGGATGGATATGTATGGAGTAGAAAGAAGCTTTCCTGGATAAAAAAGAATGAGAACAGTTCTAATGCTGCAATGGCAAACGTCTCAGGAATACCTACATTAAGTCTAAGGAACCAGGAGAGAAAGCAGAGCTGTTCCTCAGCTGAGATGGAGTTGGAACATGTATGTGGTCACAGGTTCCTAAGCCGTTCTTTTAAACAGAAATTGCAGGATGCAATGGGACAATGTTTCCCCATAAAGAGTTGTAGCACTCGGCATTCTTCAAGGCTTTCACCCAAGAGAAAAATACATATCAGTGAGCTTATGCTGGACAAATGCCCT…
XM_026652537.1	Terrapene mexicana triunguis	SOCS5	ATGGATCAAGTGGGCAAGATGTGGAACAACTTCAAATACAGATGCCAGAATCTCTTCAATCATGAAGGTGGAAACCGAAATGAAAACATAGATGTAGACTCCACTCAATGTTCATCTGTTAAAGACAGAAGTATCCATGTACCCGATTTGGCTCCGCAGCAACCAAGCAGCCCTTTAAGAGAGAACATTGCCTTACAACTGGGTTTAAGTCCTTCAAAGAATTCAGTGAGGAGAAATCAGAATTGTGTCACTGACATCCCTCAGATTGTCGAAATAAGCATTGAGAAAGATAATGACTCGTGTGTTGCCACAGGAACGAGACTTGCACAAAGGGATTCCTACTCTCGGCATGCTCCTTGGGGTGGGAAGAAGAAACATTCCTGTTCTACTAAAACCCAA…
XM_005296127.2	Chrysemys picta bellii	SOCS5	ATGGATCAGGTGGGCAAGATGTGGAACAACTTCAAATACAGATGCCAGAATCTCTTCAATCATGAAGGTGGAAACCGAAATGAAAACATAGATGTAGACTCCACTCAATGTTCATCTGTTAAAGACAGAAGTATCCATGTACCCGATTTGGCTCCGCAGCAACCAAGCAGCCCTTTAAGAGAGAACATTGCCTTACAACTGGGTTTAAGTCCTTCAAAGAATTCAGTGAGGAGAAATCAGAATTGTGTCACTGACATCCCTCAGATTGTCGAAATAAGCATAGAGAAAGATAATGACTCGTGTGTTGCCACAGGAACGAGACTTGCACAAAGGGATTCCTACTCTCGGCATGCTCCTTGGGGTGGGAAGAAGAAACATTCCTGTTCTACTAAAACCCAG…
XM_015411864.1	Gekko japonicus	SOCS5	ATGGGGAAAGTGGGGAAGATGTGGAACAGCTTCAAATATAGATGCCAGAATCTCTTTAATCCTGAGAGTGGAAACCGGAATGAAAATGTAGATGTGAACCCCAATAGTTCATCAGTTAAAGATAAAAGTGTATTTGTACCTGATACCTCTCAGCAGCAACCAAGCAGCCCTTTAAGAGATGTCTCTTTACAACTGAGTCTAAATCCTTCGAGTAATTCTTCAAGAAAAAATCAAAACTGTGCCACTGAAATCCCACAGATTGTAGAAATAAGCATTGAGAAAGAAAATGATTTGGGTGTTGCCACCGGAACTAAACTTGCACGGAGGGATTCTTACTCACGGCATGCACCGTGGGGGGGGGAAAAGAAGCATTCCTGCTCTACAAAAACACAGACCTCT…
XM_014067861.1	Thamnophis sirtalis	SOCS5	ATGGGTAAAGTTGGGAAAATGTGGAACAGCTTCAAGTACAGATGCCAAAATCTCTTTAATCCTGAAGGTGGAAATAGAAATGAAAATGTAGACATAAATTCCAATAGTGCGTCTGTTAGAGATAAAAGTGTTTGTGTGCCTGGTGCAACTCAGCAGCAACCAAACAGTCCTTTGCAACTGAGTCTAAATACTTCAAAAGGCTTTTCAAGAAAGAATCAAAACTGTGCCACAGATATCCCTCAGATTGTTGAAATAAGCATTGAGAAAGAGATTGACTTGAATGTTGCCTCAGGAGCTAAATTTGCACGAAGGGATTCCTACTCAAGGCATGCTCCATGGGGTGGGAAAAAGAAACATTCCTGCTCTACAAAGACCCAGAGCTCATTGGAAAGTGATACA…
XM_006125484.3	Pelodiscus sinensis	SOCS5	ATGGATCAAGTGGGAAAGATGTGGAACAACTTCAAATACAGATGCCAGAATCTCTTCAATCATGAAGGTGGAAACAGAAATGAAAACACAGATGTAGACTCCAGTAGGCATTCCTCTGTTAAAGACCGAAGTATCCATGTGCCCGATTTGGCTCAGCAGCAACTAAGCAGCCCTCTAAGAGAGAACATTGCCTTACAACTGGGTTTAAGTCCTTCAAAGAATTCAGCGAAGAGAAATCAGAATTGTGTCACTGACATCCCTCAAATTGTTGAAATAAGCATTGAGAAAGATAATGACACGTGTGTCACAGGAACTAGACTTGCACGAAGAGATTCCTATTCCCGGCATGCTCCTTGGGGTGGGAAGAAGAAACATTCCTGTTCTACAAAAACCCAAAGC…
XM_006014732.3	Alligator sinensis	SOCS5	ATGGATAAGGTGGGAAAGATGTGGAACAACTTCAAATACAGATGCCAAAATCTCTTCAGTCATGAAAGTGGAAACCGAAATGATGATGTAGCTGTGAAATCCAGTAGATGTTTATCTGTTAAGGATAAAAGTGTCAATGTACCTGATTTGGCTCAGCAGCAACCCAGCAGCCCTTTAAGAGAGAATGTTGCCTTACAATTAGGGTTAAGTCCTTCAAAGAATTCAGTGAGACGAAATCAGAATTGTGTCACTGAGATCCCTCAAATTGTTGAAATAAGTATTGAGAAAGAAAACGAGTTGTGTGTTCCCACAGGAGCTAGACTGGCACGAAGGGACTCTTACTCTCGGCATGCTCCTTGGGGTGGGAAGAAGAAACATTCCTCCTCTACAAAAACCCAG…
XM_026695865.1	Pseudonaja textilis	SOCS5	ATGGGTAAAGTTGGGAAAATGTGGAACAGCTTCAAGTACAGATGCCAAAGTCTCTTTAATCCTGAAGGTGGAAATAGAAATGAAAATGTGGACATAAATTCCAGTAGTGCATCTGTTAGAGATAAAAGTGTTTGTATGCCTGGTCCAACTCAGCAGCAACCAAGCAGTCCTTTGCAACTGAATCTAAATACTTCAAAAGGCTTTTCAAGAAAGAATCAAAACTGTGCCACAGAAATCCCTCAGATTGTTGAAATAAGCATTGAGAAAGAGATTGACTTGAATGTTGCCTCAGGAGCTAAATTTGCACGAAGAGATTCCTACTCAAGACATGCTCCATGGGGTGGGAAAAAGAAACATTCCTGCTCTACAAAAACCCAGAGCTCATTGGAAAGTGATATA…
XM_026683725.1	Notechis scutatus	SOCS5	ATGGGTAAAGTTGGGAAAATGTGGAACAGCTTTAAGTACAGATGCCAAAGTCTCTTTAATCCTGAAGGTGGAAATAGAAATGAAAATGTGGACATAAATTCCAATAGTGCATCTGTTAGAGATAAAAGTGTTTGTATGCCTGGTCCAACTCAGCAGCAACCAAGCAGTCCTTTGCAACTGAATCTAAATACTTCAAAAGGCTTTTCAAGAAAGAATCAAAACTGTGCCACAGAAATCCCTCAGATTGTTGAAATAAGCATTGAGAAAGAGATTGACTTGAATGTTGCCTCAGGAGCTAAATTTGCACGAAGGGATTCCTACTCAAGACATGCTCCATGGGGTGGGAAAAAGAAACATTCCTGCTCTACAAAAACCCAGAGCTCATTGGAAAGTGATATA…
XM_020796901.1	Pogona vitticeps	SOCS5	ATGGGTAAAGTTGGGAAGATGTGGAATAGCTTCAAATACAGATGCCAGAATCTTTTCAGCACTGAAGGTGGGAACAGAAGTGAAAATGTAGATGGAAACTGTAATACATCAATTCAAGATAAAAGTGTTTTCGTGCCTGACTCAGCTGAGCAACAACCAAACAGTCCTTTAAGAGATGTTCCTTTACAGCTGGGTCTAAATATTTCAAAAAATTCTTCAAGAAAAAATCAAAACTGTGCCACAGAAATCCCACAGATTGTGGAAATAAGCATTGAAAAAGAGAGTGACCTGGGTGTTACTACAGGAGCTAGGATTGCACGAAGGGATTCCTACTCACGACATGCACCATGGGGTGGTAAAAAGAAGCATTCTTGCTCTACAAAAACCCAGAGCTCTTTG…
XM_019549354.1	Crocodylus porosus	SOCS5	ATGGATAAGGTGGGAAAGATGTGGAACAACTTCAAATACAGATGCCAAAATCTCTTCAGTCATGAAAGTGGAAACCGAAATGATGATGTAGCTGTGAAATCCAGTAGATGTTTATCTGTTAAGGATAAAAGTGTCAATGTACCTGATTTGGCTCAGCAGCAACCCAGCAGCCCTTTAAGAGAGAATGTTGCCTTACAATTAGGGTTAAGTCCTTCAAAGAATTCAGTTAGACGAAATCAGAATTGTGTCACTGAGATCCCTCAAATTGTTGAAATAAGTATTGAGAAAGAAAATGAGTTATGTGTTCCCACAGGAGCTAGACTGGCACGAAGGGACTCTTACTCTCGGCATGCTCCTTGGGGTGGGAAGAAGAAACATTCCTGCTCTACAAAAACCCAG…
XM_019516318.1	Gavialis gangeticus	SOCS5	ATGGATAAGGTGGGAAAGATGTGGAACAACTTCAAATACAGATGCCAAAATCTCTTCAGTCATGAAAGTGGAAACCGAAATGATGATGTAGCTGTGAAATCCAGTAGATGTTTATCTGTTAAGGATAAAAGTGTCAATGTACCTGATTTGGCTCAGCAGCAACCCAGCAGCCCTTTAAGAGAGAATGTTGCCTTACAATTAGGGTTAAGTCCTTCAAAGAATTCAGTTAGACGAAATCAGAATTGTGTCACTGAGATCCCTCAGATTGTTGAAATAAGTATTGAGAAAGAAAATGAGTTGTGTGTTCCCACAGGAGCTAGACTGGCACGAAGGGACTCTTACTCTCGGCATGCTCCTTGGGGTGGGAAGAAGAAACATTCCTGCTCTACAAAAACCCAG…
XM_015816408.1	Protobothrops mucrosquamatus	SOCS5	ATGGGTAAAGTTGGGAAAATGTGGAACAGCTTCAAGTACAGATGCCAAAGTCTCTTTAATCCTGAAGGTGGAAATAGAAATGAAAATGTAGACATAAATTCCAATAGTGCATCTGTTAGAGATAAAAGTGTTTGCGTGCCTGGTCCAACTCAGCAGCAACCTAGCAGTCCTTTGCAACTTAATCTAAATATTTCAAAAGGCTTTTCGAGGAAGAATCAAAACTGTGCCACAGAAATCCCTCAGATTGTTGAAATAAGCATTGAGAAGGAGATTGACTTGAATGCTGCCTCGGGAGCTAAATTTGCACGAAGGGATTCTTACTCAAGGCATGCTCCATGGGGTGGGAAAAAGAAACATTCCTGCTCTACAAAAACCCAGAGCTCTTTGGAAAGTGATAAA…
XM_015890526.2	Python bivittatus	SOCS5	ATGGGTAAAGTTGGGAAAATGTGGAACAGCTTCAAGTACAGATGCCAAAGTCTCTTTAATCCTGAAGGTGGAAATAGAAATGAAAATGTAGACATAAATTCCAATAGTGCATCTGTTAGAGATAAAAGTGTTTGTGTGCCTGGTCCAACTCAGCAGCAACCTAGCAGCCCTTTGCAACTGAATCTAAGTACTTCAAAAAGCTTTTCAAGGAAGAATCAAAATTGTGCCACAGAAATCCCTCAGATTGTGGAAATAAGCATTGAGAAAGAGCTTGACTTGAATGTTGCCTCAGGAGCTAAATTTGCACGAAGGGATTCCTACTCACGGCATGCCCCATGGGGTGGGAAAAAGAAGCATTCCTGCTCTACAAAAACCCAGAGCTCTTTGGAAAGTGATAAA…
XM_027834435.1	Chelonia mydas	SOCS5	ATGGATCAAGTGGGAAAGATGTGGAACAACTTCAAATACAGATGCCAGAATCTCTTCAATCATGAAGGTGGAAACCGAAATGAAAACATAGATGTAGACTCCACTCGATGCTCATCTGTTAAAGAGAGAAGTATCCATGTACCCGATTTGGCTCCGCAGCAACCAAGCAGCCCTTTAAGAGAGAACATTGCCTTACAACTAGGTTTAAGTCCTTCAAAGAATTCAGTGAGGAGAAATCAGAATTGTGTCACTGACATCCCTCAGATTGTCGAAATAAGCATTGAGAAAGATAATGACTCGTGTGTTACCACAGGAACGAGACTTGCACGAAGGGATTCCTACTCTCGGCATGCTCCTTGGGGTGGGAAAAAGAAACATTCCTGTTCTACAAAAACCCAG…
XM_019485345.1	Alligator mississippiensis	SOCS5	ATGGATAAGGTGGGAAAGATGTGGAACAACTTCAAATACAGATGCCAAAATCTCTTCAGTCATGAAAGTGGAAACCGAAATGATGATGTAGCTGTGAAATCCAGTAGATGTTTATCTGTTAAGGATAAAAGTGTCAATGTACCTGATTTGGCTCAGCAGCAACCCAGCAGCCCTTTAAGAGAGAATGTTGCCTTACAATTAGGGTTAAGTCCTTCAAAGAATTCAGTGAGACGAAATCAGAATTGTGTCACTGAGATCCCTCAAATTGTTGAAATAGAAAACGAGTTATGTGTTCCCACAGGAGCTAGACTGGCACGAAGGGACTCTTACTCTCGGCATGCTCCTTGGGGTGGGAAGAAGAAACATTCCTGCTCTACAAAAACCCAGAGCTCCTTGGAT…
XM_016991522.1	Anolis carolinensis	SOCS5	ATGGGTAAAGTTGGGAAGATGTGGAATAGCTTTAAATACAGATGCCAGAATCTCTTCAATAACGAAAGTGGAAACAGAAATGAAAATTTAGATGTGAACTCCAATAATTCATCTGTTAGAGATAAAAGTGTTTTTGTGCTTGATCCAGTGGATCAGCGATCAAGCAGCCCTTTAAGAGATGTTTCTTTACAGCTGAGTTTAAATCCTTCAAAAGCCTCTTCAAAAAAACTTCAAAACTGCGCTGCTGAAATCCCACAGATTGTGGAAATAAGCATTGAGAAAGAGAGTGACTTGGGTGCCGCCACAGGAGCTAGACTTGCACGAAGGGATTCATACTCACGACATGCACCATGGGGTGGTAAAAAGAAACATTCCTGTTCTACAAAAACACAGAGCTCT…
KB930152.1	Apalone_spinifera	SOCS5	ATGGATCAAGTGGGAAAGATGTGGAACAACTTCAAATACAGATGCCAGAATCTCTTCAATCATGAAGGTGGAAACAGAAATGAAAACATAGATGTAGACTCCAGTAGGCATTCCTCTGTTAAAGACCGAAGTATCCATGTGCCCGATTTGGCTCATCAGCAACCAAGCAGCCCTCTAAGAGAGAACATTGTCTTACAACTGGGTTTAAGTCCTTCAAAGAATTCAGTGAAGAGAAATCAGAATTGTGTCACTGACATCCCTCAAATTGTTGAAATAAGCATTGAGAAAGATAATGACTCATGTGTCACAGGAACTAGACTTGCACGAAGAGATTCCTATTCCCGGCATGCTCCTTGGGGTGGGAAGAAGAAACATTCCTGTTCTACAAAAACCCAAAGC…
PKMU01001506.1	Chelonoidis_abingdonii	SOCS5	ATGGATCAAGTGGGAAAGATGTGGAACAACTTCAAATACAGATGCCAGAATCTCTTCAATCATGAAGGTGGAAACCGAAATGAAAACATAGATGTGGACTTCACTCGATGTTCATCTGTTAAAGACAGAAGTATCCATGTACCCGATTTGGCTCTGCAGCAACCAAGCAGCCCTTTAAGAGAGAACATTGCCTTACAACTGGGTTTAAGTCCTGCAAAGAATTCAGTGAGGAGAAATCAGAATTGTGTCACTGACATCCCTCAGATTGTCGAAATAAGCGTTGAGAAAGATAATGACTCGTGTGTGGCCACAGGAACGAGACTTGCACAAAGGGATTCCTACTCTCGGCATGCTCCTTGGGGTGGGAAGAAGAAACATTCCTGTTCTACGAAAACCCAA…
LVCR01005694.1	Crotalus_horridus	SOCS5	ATGGGTAAAGTTGGGAAAATGTGGAACAGCTTCAAGTACAGATGCCAAAGTCTCTTTAATCCTGAAGGTGGAAATAGAAATGAAAATGTAGACATAAATTCCAATAGTGCATCTGTTAGAGATAAAAGTGTTTGCGTGCCTGGTCCAACTCAGCAGCAACCTAGCAGTCCTTTGCAACTTAATCTAAATATTTCAAAAGGCTTTTCGAGGAAGAATCAAAACTGTGCCACAGAAATCCCTCAGATTGTTGAAATAAGCATTGAGAAAGAGATTGACTTGAATGTTGCCTCGGGAGCTAAATTTGCACGAAGGGATTCTTACTCAAGGCATGCTCCATGGGGTGGGAAAAAGAAACATTCCTGCTCTACAAAAACCCAGAGCTCTTTGGAAAGTGATAAA…
JPMF01058311.1	Crotalus_pyrrhus	SOCS5	ATGGGTAAAGTTGGGAAAATGTGGAACAGCTTCAAGTACAGATGCCAAAGTCTCTTTAATCCTGAAGGTGGAAATAGAAATGAAAATGTAGACATAAATTCCAATAGTGCATATGTTAGAGATAAAAGTGTTTGCGTGCCTGGTCCAACTCAACAGCAACCTAGCAGTCCTTTGCAACTTAATCTAAATATTTCAAAAGGCTTTTCGAGGAAGAATCAAAACTGTGCCACAGAAATCCCTCAGATTGTTGAAATAAGCATTGAGAAAGAGATTGACTTAAATGTTGCCTCGGGAGCTAAATTTGCACGAAGGGATTCTTACTCAAGGCATGCTCCATGGGGTGGGAAAAAGAAACATTCCTGCTCTACAAAAACCCAGAGCTCTTTGGAAAGTGATAAA…
PDHV01000149.1	Crotalus_viridis	SOCS5	ATGGGTAAAGTTGGGAAAATGTGGAACAGCTTCAAGTACAGATGCCAAAGTCTCTTTAATCCTGAAGGTGGAAATAGAAATGAAAATGTAGACATAAATTCCAGTAGTGCATCTGTTAGAGATAAAAGTGTTTGCGTGCCTGGTCCAACTCAGCAGCAACCTAGCAGTCCTTTGCAACTTAATCTAAATATTTCAAAAGGCTTTTCGAGGAAGAATCAAAACTGTGCCACAGAAATCCCTCAGATTGTTGAAATAAGCATTGAGAAAGAGATTGACTTAAATGTTGCCTCGGGAGCTAAATTTGCACGAAGGGATTCTTACTCAAGGCATGCTCCATGGGGTGGGAAAAAGAAACATTCCTGCTCTACAAAAACCCAGAGCTCTTTGGAAAGTGATAAA…
ML123139.1	Cuora_mccordi	SOCS5	ATGGATCAAGTGGGAAAGATGTGGAACAACTTCAAATACAGATGCCAGAATCTCTTCAATCATGAAGGTGGAAACCGAAATGAAAACATAGATGTAGACTCCACTCGATGTTCATCTGTTAAAGACAGAAGTATCCATGTACCCGATTTGGCTCCGCAGCAACCAAGCAGCCCTTTAAGAGAGAACATTGCCTTACAACTGGGTTTAAGTCCTTCAAAGAATTCAGTGAGGAGAAATCAGAATTGTGTCACTGACATCCCTCAGATTGTTGAAATAAGCATTGAGAAAGATAATGACTCGTGTGTTGCCACAGGAACGAGACTTGCACAAAGGGATTCCTACTCTCGGCATGCTCCTTGGGGTGGGAAGAAGAAACATTCCTGTTCTACGAAAACCCAA…
PPEB01006509.1	Gopherus_agassizii	SOCS5	ATGGATCAAGTGGGAAAGATGTGGAACAACTTCAAATACAGATGCCAGAATCTCTTCAGTCATGAAGGTGGAAACCGAAATGAAAACATAGATGTAGACTCCACTCGATGTTCATCTATTAAAGACAGAAGTATCCATGTACCCGATTTGGCTCTGCAGCAACCAAGCAGCCCTTTAAGAGAGAACATTGCCTTACAACTGGGTTTAAGTCCTTCGAAGAATTCAGTGAGGAGAAATCAGAATTGTGTCACTGACATCCCTCAGATTGTCGAAATAAGCATTGAGAAAGATAATGATTCGTGTGTGGCCACAGGAACGAGACTTGCACAAAGGGATTCCTACTCTCGGCATGCTCCTTGGGGTGGGAAGAAGAAACATTCCTGTTCTACGAAAACCCAA…
RSAE01155681.1	Hydrophis_cyanocinctus	SOCS5	ATGGGTAAAGTTGGGAAAATGTGGAACAGCTTCAAGTACAGATGCCAAAGTCTTTTTAATCCTGAAGGTGGAAATAGAAATGAAAATGTGGACATAAATTCCAATAGTGCATCTGTTAGAGATAAAAGTGTTTGTATGCCTGGTCCAACTCAGCAGCAACCAAGCAGTCCTTTGCAACTGAATCTAAATACTTCAAAAGGCTTTTCAAGAAAGAATCAAAACTGTGCCACAGAAATCCCTCAGATTGTTGAAATAAGCATTGAGAAAGAGATTGACTTGAATGTTGCCTCAGGAGCTAAATTTGCACGAAGGGATTCCTACTCAAGACATGCTCCATGGGGTGGGAAAAAGAAACATTCCTGCTCTACAAAAACCCAGAGCTCATTGGAAAGTGATATA…
RSAD01174463.1	Hydrophis_hardwickii	SOCS5	ATGGGTAAAGTTGGGAAAATGTGGAACAGCTTCAAGTACAGATGCCAAAGTCTTTTTAATCCTGAAGGTGGAAATAGAAATGAAAATGTGGACATAAATTCCAATAGTGCATCTGTTAGAGATAAAAGTGTTTGTATGCCTGGTCCAACTCAGCAGCAACCAAGCAGTCCTTTGCAACTGAATCTAAATACTTCAAAAGGCTTTTCAAGAAAGAATCAAAACTGTGCCACAGAAATCCCTCAGATTGTTGAAATAAGCATTGAGAAAGAGATTGACTTGAATGTTGCCTCAGGAGCTAAATTTGCACGAAGGGATTCCTACTCAAGACATGCTCCATGGGGTGGGAAAAAGAAACATTCCTGCTCTACAAAAACCCAGAGCTCATTGGAAAGTGATATA…
OFHV01001344.1	Lacerta_bilineata	SOCS5	ATGGGTAAAGTTGGGAAGATGTGGAACAGCTTCAAGTACAGATGCCAGAATCTCTTCAACTCTGAAGGTGGAAGCAGAAGTGAAAATGTAGATGTAAACTCTAATTGTTCTTCTGTTAGAGATAAAAGTGTGTTTGTTCCTGATGCAGCTGCACAACGGCCCAGCAGCCCTTTAAGAGATGTTTCTTTACAACTGAGTCTAAACCCTTCAAAAAGCTCTGCAAGGAAAAATCAAAACTGTGCTGCAGAAATCCCACAAATTGTGGAAATAAGCATTGAGAGAGAGTGTGACTTGGGTGTTGCCACAGGAGCTAGACTTGCACGAAGAGATTCCTACTCAAGGCATGCACCATGGGGTGGGAAAAAGAAACATTCCTGCTCTACAAAAACCCAGAGCTCT…
OFHU01002841.1	Lacerta_viridis	SOCS5	ATGGGTAAAGTTGGGAAGATGTGGAACAGCTTCAAGTACAGATGCCAGAATCTCTTCAACTCTGAAGGTGGAAGCAGAAGTGAAAATGTAGATGTAAACTCTAATTGTTCTTCTGTTAGAGATAAAAGTGTGTTTGTTCCTGATGCAGCTGCACAACGGCCCAGCAGCCCTTTAAGAGATGTTTCTTTACAACTGAGTCTAAACCCTTCAAAAAGCTCTGCAAGGAAAAATCAAAACTGTGCTGCAGAAATCCCACAAATTGTGGAAATAAGCATTGAGAGAGAGTGTGACTTGGGTGTTGCCACAGGAGCTAGACTTGCACGAAGAGATTCCTACTCAAGGCATGCACCATGGGGTGGGAAAAAGAAACATTCCTGCTCTACAAAAACCCAGAGCTCT…
MDXI01000133.1	Malaclemys_terrapin	SOCS5	ATGGATCAAGTGGGCAAGATGTGGAACAACTTCAAATACAGATGCCAGAATCTCTTCAATCATGAAGGTGGAAACCGAAATGAAAACATAGATGTAGACTCCACTCAATGTTCATCTGTTAAAGACAGAAGTATCCATGTACCCGATTTGGCTCCGCAGCAACCAAGCAGCCCTTTAAGAGAGAACATTGCCTTACAACTGGGTTTAAGTCCTTCAAAGAATTCAGTGAGGAGAAATCAGAATTGTGTCACTGACATCCCTCAGATTGTCGAAATAAGCATAGAGAAAGATAATGACTCGTGTGTTGCCACAGGAACGAGACTTGCACAAAGGGATTCCTACTCTCGGCATGCTCCTTGGGGTGGGAAGAAGAAACATTCCTGTTCTACTAAAACCCAA…
AZIM01001250.1	Ophiophagus_hannah	SOCS5	ATGGGTAAAGTTGGGAAAATGTGGAACAGCTTCAAGTACAGATGCCAAAGTCTCTTTAATCCTGAAGGTGGAAATAGAAATGAAAATGTAGACATAAATTCCAATAGTGCATCTGTTAGAGATAAAAGTGTTTGTGTGCCTGGTCCAACTCAGCAGCAACCAAGCAGTCCTTTGCAATTGAATCTAAATACTTCAAAAGGCTTTTCAAGAAAGAATCAAAACTGTGCCACAGAAATCCCTCAGATTGTTGAAATAAGCATTGAGAAAGAGATTGACTTGAATGTTGCCTCAGGAGCTAAATTTTCACGAAGGGATTCCTACTCAAGACATGCTCCATGGGGTGGGAAAAAGAAACATTCCTGCTCTACAAAAACCCAGAGCTCATTGGAAAGTGATATA…
JTLQ01096240.1	Pantherophis_guttatus	SOCS5	ATGGGTAAAGTTGGGAAAATGTGGAACAGCTTCAAGTACAGATGCCAAAGTCTCTTTAATCCTGAAGGTGGAAATAGAAATGAAAATGTAGACATAAATTCCAATAGTGCATCTGTTAGAGATAAAAGTGTTTGTGTGCCTGGTCCAACTCAGCAGCAACCAAGCAGTCCTTTGCAACTGAATCTAAATACTTCAAAAGGCTTTTCGAGAAAGAATCAAAACTGTGCCACAGAAATCCCACAGATTGTTGAAATAAGCATTGAGAAAGAAATTGACTTGAATGTTGCCTCAGGAGCTAAATTTGCACGAAGGGATTCCTACTCAAGGCATGCTCCATGGGGTGGGAAAAAGAAACATTCCTGCTCTACAAAAACTCAGAGCTCATTGGAAAGTGATACA…
BDOT01000111.1	Paroedura_picta	SOCS5	ATGGGGAAAGTGAGGAAGATGTGGAACAGCTTCAAATATAGATGCCAGAATCTCTTTAATCCTGAAAATGGAAACCGACACGAAAATGTTGACGTGGACTCCAGTACATCAGTTAAAGATAAAAGTGTGTTTGTACCTGATGCTACTGAGCAGCAATCTAGCAACCCTTTAAGAGATGTCTCCTTACAACTGAATCTAAATCCTTCAAGAAAAAATCAAAACTGTGCCGCTGAAATCCCACAGATTGTAGAAATAAGCCTTGAGAAAGAAAATGATTTGGGTGTTGCCACCGGCACTAGACTTGCACGGAGGGATTCTTATTCACGGCATGCACCATGGGGTGGGAAAAAGAAGCATTCCTGCTCTACAAAAACACAGAGCTCTTTGGAGAATGATAAA…
QXTE01000231.1	Platysternon_megacephalum	SOCS5	ATGGATCAAGTGGGAAAGATGTGGAACAACTTCAAATACAGATGCCAGAATCTCTTCAATCATGAAGGTGGAAACCGAAATGAAAACATAGATGTAGACTCCACTCGATGTTCATCTGTTAAAGACAGAAGTATCCATGTACCCGATTTGGCTCCGCAGCAACCAAGCAGCCCTTTAAGAGAGAACATTGCCTTACAACTGGGTTTAAGTCCTTCAAAGAATTCAGCGAGGAGAAATCAGAATTGTGTCACTGACATCCCTCAGATTGTCGAAATAAGCATTGAGAAAGATAATGACTCGTGTGTTGCCACAGGAACGAGACTTGCACAAAGGGATTCCTACTCTCGGCATGCTCCTTGGGGTGGGAAGAAGAAACATTCCTGTTCTACGAAAACCCAA…
CM014745.1	Podarcis_muralis	SOCS5	ATGGGTAAAGTTGGGAAGATGTGGAACAACTTCAAGTACAGGTGCCAGAATCTCTTCAACTCTGAAGGTGGAAACAGAAGTGAAAATGTAGATGTAAACTCTAATTGTTCTTCCGTTAGAGATAAAAGTGTGTTTGTTCCTGATCCAGCTGCGCAACGACCCAGCAGCCCTTTAAGAGATGTTTCTTTACAACTGAGTCTAAACCCTTCAAAAAGCTCTGCAAGGAAAAATCAAAACTGTGCCGCAGAGATCCCGCAAATTGTGGAAATAAGCCTTGAGAGAGAGAGTGACTTGGGTGTTGGCACAGGTGCTAGACTTGCACGAAGAGATTCCTACTCAAGGCATGCACCCTGGGGTGGGAAAAAGAAACATTCCTGCTCGACAAAAACCCAGAGCTCT…
BFFQ01082552.1	Protobothrops_flavoviridis	SOCS5	ATGGGTAAAGTTGGGAAAATGTGGAACAGCTTCAAGTACAGATGCCAAAGTCTCTTTAATCCTGAAGGTGGAAATAGAAATGAAAATGTAGACATAAATTCCAATAGTGCATCTGTTAGAGATAAAAGTGTTTGCGTGCCTGGTCCAACTCAGCAGCAACCTACCAGTCCTTTGCAACTTAATCTAAATATTTCAAAAGGCTTTTCGAGGAAGAATCAAAACTGTGCCACAGAAATCCCTCAGATTGTTGAAATAAGCATTGAGAAAGAGATTGACTTGAACGTTGCCTCGGGAGCTAAATTTGCACGAAGGGATTCTTACTCACGGCATGCTCCATGGGGTGGGAAAAAGAAACATTCCTGCTCTACAAAAACCCAGAGCTCTTTGGAAAGTGATAAA…
QEPC01011569.1	Sphenodon_punctatus	SOCS5	ATGGATAAAGTGGGAAAGATGTGGAACAATTTCAAATACAGATGCCAGAATCTCTTCAATCATGAAGGCGGAAACCGAAATGAAAGCATAGATGTAAACTCCAATAATTCATCTTTTAAAGATAGAGGTCTTGATGTACCTGATTTGGCTCAGCAGCCGTCAAGTAGCCCTTTAAGAGAGAGTATCTCCTTACAACTGGGTTTGAGTCCTTCAAAAAACTCATCAAGGAAGAATCAAAACTGTGTTACTGAAATCCCCCCTCAGATTGTTGAAATAAGCATTGAAAAAGAGAGTGACGACACATGGAGCACCACAGGAACTACTAGGCTTGCACGGAGAGACTCGTACACTCGGCACGCTCCTTGGGGTGGGAAGAAGAAACATTCCTGCTCTACAAAG…
QVOM02000121.1	Salvator_merianae	SOCS5	ATGGGTAAAGTTGGGAAGATGTGGAGCAGCTTCAAGTACAGATGCCAGAATTTCTTCAACCCTGAAAGTGGAAACCGAAGTGAAAATGTAGATGTAAATTCCAATTGTTCGTCTGCTAGAGATAAAAGTGTGTTTGTGCCTGAGTCAGCTGATCAGCAGCCAAGTAGCCCTTTAAGAGATGTTTCTGTACAGCTGAACCTGAATCCTTCGAGAAGTTCTGCAAGGAAAAATCAGAACTGTGCCACCGAAATCCCCCAGATTGTGGAAATAAGCATTGAGAAAGAGAATGATTTGGGTGTTACCACAGGGACAAGACTTGCACGAAGGGATTCCTACTCGCGGCACGCGCCATGGAGTGGGAAAAAGAAGCATTCCTGCTCTACAAAAACCCAGAGCTCT…
QLTV01012198.1	Thermophis_baileyi	SOCS5	ATGGGTAAAGTTGGGAAAATGTGGAACAGCTTCAAGTACAGATGCCAAAGTCTCTTTAATCCTGAAGGTGGAAATAGAAATGAAAATGTAGACATAAATTCCAATAGTGCATCTGTTAGAGATAAAAGTGTTTGTGTGCCTGGTCCAACTCAGCAGCAACCAAGCAGTCCTTTGCAACTGAATCTAAATACTTCAAAAGGCTTTTCGAGAAAGAATCAAAACTGTGCCACAGAAATCCCTCAGATTGTTGAAATAAGCATTGAGAAAGAGATTGACTTGAATGTTGCCCCAGGAGCTAAATTTGCACGAAGGGATTCCTACTCAAGGCATGCTCCATGGGGTGGGAAAAAGAAACATTCCTGTTCTACAAAAACCCAGAGCTCATTGGAAAGTGATACA…
KN637400.1	Vipera_berus	SOCS5	ATGGGTAAAGTTGGGAAAATGTGGAACAGCTTCAAGTACAGATGCCAAAGTCTCTTTAATCCTGAAGGTGGAAATAGAAATGAAAATGTAGACATAAATTTCAATAGTGCATCTGTTAGAGATAAAAGTGTTTACATGCCTGGTCCAACTCAGCAGCAACCTACCAGTCCTTTGCAACTTAATCTAAATACTTCAAAAGGCTTTTCGAGGAAGAATCAAAACTGTGCCACAGAAATCCCTCAGATTGTTGAAATAAGCATTGAGAAAGAGATTGACTTGAATGTTGCCTCGGGAGCTAAATTTGCACGTAGGGATTCCTACTCAAGGCATGCTCCATGGGGTGGGAAAAAGAAACATTCCTGCTCTACAAAAACCCAGAGCTCTTTGGAAAGTGATAAA…
XM_020796638.1	Pogona vitticeps	SOCS6	ATGAAGAAAATTAGTCTCAAGACCATTCGTAAATCTTTTAATTTAAATAAGAGCAAAGATGACAGTGACTTTGTAGTAGTTGCACAGCCATCATTAAATGATTTTGCAAAAGACGACTCCTTATTTGGGAGCTGCTACGGTAAAGATTTGACTAACTGCGACATTAACAGCGAAGATGAGAAAGGTGGGAAAAACAGATCAAAGAGTGAAAGTTTAATGGGTACGTTAAAAAGAAGACTGTCAGCAAAACAGAAGCAGAAAGGCAACAAAGGTAGTACCCCATCTGTAAGTTCTGCTGATGACGACACCTTCTCTTCTTCTTCTGCTCCAATAACCTTCAAAGATGTGAGAGCTCAAAGGCCTCTTAGATCCACTTCCCTACGAAATCATCATTATAGT…
XM_005281478.3	Chrysemys picta bellii	SOCS6	ATGAAGAAAATTAGTCTCAAAACAATTCGCAAGTCCTTTAACTTAAATAAAAGCAAAGAAGAAAGTGACTTTGTAGTGGTTCAGCAGCCATCATTAAGTGAATTTGGAAAAGATGACTCCTTGTTTGGCAGCTGCTACGGTAAAGATTTGGCTAGCTGTGAAGTTAACAGTGAAGATGAAAAAGGTGGCAAAAATAGATCAAAAAGTGAAAGCCTAATGGGTACTTTAAAAAGAAGGCTTTCAGCAAAACAAAAGCAGAAAGGGAAAGGCAGCACGCCATCTGTAAGCTCTGCTGATGACGATACCTTTTCTTCCTCATCTGCTCCAATAACCTTTAAAGATGTGAGAGCTCAAAGACCTCTAAGGTCCACATCCCTCCGTAACCACCATTACAGTCCA…
XM_006272310.3	Alligator mississippiensis	SOCS6	ATGAAGAAAATTAGTCTCAAAACAATTCGCAAGTCCTTTAACTTAAATAAAAGCAAAGATGAAAGTGACTTTGTAGTGGTTCAGCAGCCGTCATTAAGTGAATTTGGAAAAGATGACTCCTTGTTTGGCAGCTGTTATGGTAAAGATTTGGCTAGCTGTGAAGTCAACAGTGAAGATGAAAAAGGCAAAAATAGATCAAAAAGTGAAAGCTTAATGGGTACGTTAAAAAGGAGGCTTTCAGCGAAACAAAAGCAGAAAGGCAAAGGTAGCACGCCATCTGTAAGCTCTGCTGATGACGACACCTTTTCTTCCTCATCTGCTCCAATAACCTTCAAAGATGTGAGAGCTCAAAGACCTTTAAGATCCACATCCCTCCGTAACCACCATTATAGTCCAACT…
XM_025211347.1	Alligator sinensis	SOCS6	ATGAAGAAAATTAGTCTCAAAACAATTCGCAAGTCCTTTAACTTAAATAAAAGCAAAGATGAAAGTGACTTTGTAGTGGTCCAGCAGCCGTCATTAAGTGAATTTGGAAAAGATGACTCCTTGTTTGGCAGCTGTTATGGTAAAGATTTGGCTAGCTGTGAAGTCAACAGTGAAGATGAAAAAGGCAAAAATAGATCAAAAAGTGAAAGCTTAATGGGTACGTTAAAAAGGAGGCTTTCAGCAAAACAAAAGCAGAAAGGCAAAGGTAGCACGCCATCTGTAAGCTCTGCTGATGACGACACCTTTTCTTCCTCATCTGCTCCAATAACCTTCAAAGATGTGAGAGCTCAAAGACCTTTAAGATCCACATCCCTCCGTAACCACCATTATAGTCCAACT…
XM_008108729.2	Anolis carolinensis	SOCS6	ATGAAGAAAATTAGTCTCAAGACTATTCGTAAGTCTTTTAATTTAAATAAGAGCAAAGATGAAAGTGACTTTGTTGTAGTCACACAGCCATCATTGAATGATTTTGGAAAAGATGACTCCTTGTTTGGTGGCTGCTATGGTAAAGATTTGGCTAGCTGTGACATCAACAGTGAAGATGAGAAAAGTGGGAAGAACAGATCGAAAAGTGAAAGTTTAATGGGTACGTTAAAAAGAAGACTTTCAGCAAAACAAAAGCAGAAAGGCAGCAAAGGTAGTACACCTTCTGTAAGCTCTGCTGATGATGATACCTTTTCATCATCTTCTGCTCCAATAACTTTCAAAGATGCAAGAACTCAAAGGCCTCTTAGATCGACATCCCTCCGAAATCACCATTATAGT…
XM_026699449.1	Pseudonaja textilis	SOCS6	ATGAAGAAAATTAGTCTGAAGACCATTCGTAAATCTTTTAACTTAAATAAAAGCAAAGATGACAGTGACTTTGTTGTAGTTGCACAGCCATCATTAAATGATTTTGGAAATGATGACTCCTTGTTTGCTAGCTGTTATGGTAAAGATTTGGCTAGCTGTGACATCAACAGCGAAGATGAGAAAGGTGGCAAAAACAGATCAAAGAGTGAAAGTTTAATGGGTACATTAAAAAGACGACTTTCAGCAAAACAGAAGCAAAAAGGTGGAAAGGGCAGCACGCCATCCGTGAGCTCTGCTGATGAAGATACTTTTTCTTCTTCTTCTGCACCAATAACTTTCAAAGATGTAAGAGCTCAACGACCTCTTCGGTCCACATCCCTCCGAAACCACCACTATAGT…
XM_026647327.1	Terrapene mexicana	SOCS6	ATGAAGAAAATTAGTCTCAAAACAATTCGCAAGTCCTTTAACTTAAATAAAAGCAAAGAAGAAAGTGACTTTGTAGTGGTTCAGCAGCCATCATTAAGTGAATTTGGAAAAGATGACTCCTTGTTTGGCAGCTGCTATGGTAAAGATTTGGCTAGCTGTGAAGTTAACAGTGAAGATGAAAAAGGTGGCAAAAATAGATCAAAAAGTGAAAGCTTAATGGGTACTTTAAAAAGAAGGCTTTCAGCAAAACAAAAGCAGAAAGGGAAAGGCAGCACACCATCTGTAAGCTCTGCTGATGACGATACCTTTTCTTCCTCATCTGCTCCAATAACCTTTAAAGATGTGAGAGCTCAAAGACCTCTAAGGTCCACATCCCTCCGTAACCACCATTACAGTCCA…
XM_015818245.1	Protobothrops mucrosquamatus	SOCS6	ATGAAGAAAATTAGTCTCAAGACCATCCGCAAATCTTTTAACTTAAATAAAAGCAAAGATGACAGTGACTTCGTTGTGGTTGCACAGCCATCATTAAATGATTTTGGAAAAGATGACTCCATGTTTGCCAGCTGTTATAGTAAAGATTTGGCTAGTTGTGACATCAACAGCGAAGACGAGAAAGGTGGCAAAAACAGATCAAAGCCTGAAAGCTTAATGGGTACATTAAAAAGACGACTTTCAGCAAAACAGAAGCAAAAAGGTGGAAAGGGGAGCACGCCATCCGTGAGCTCTGCTGATGAAGATACCTTTTCTTCTTCTTCTGCTCCAATAGCTTTCAAAGATGTAAGAGCTCAAAGACCTCTTCGATCCACATCCCTCCGAAACCACCATTACAGT…
XM_015407630.1	Gekko japonicus	SOCS6	ATGATGAAGAAAATTAGTCTGAAGACCATTCGCAAGTCTTTTAATTTAAATAAAAGCAAAGATGATAACGACTTTGTTGTGGTTACGCAGCCATCACTAAGTGATTTTGGGAAAGACGACTCTTTGTTTGGTAGCTGCTATGGTAAAGATTTGGCTAGCTGTGATGTCAACAGTGAAGATGAAAAAGGTGGCAAAAGCCGCTCAAAGAGCGAAAGTTTAATGGGTACTTTAAAACGAAGACTTTCAGCAAAACAAAAGCAGAAGGGCAAAGGCAGCACACCTTCTGTTAGCTCTGCTGATGATGACACATTTTCTTCCTCTTCTGCTCCAATAAACTTCAAAGATGTGAGAGCTCAAAGACCTCTTCGATCCACATCCCTCCGTAATCACCATTATAGT…
XM_014051628.1	Thamnophis sirtalis	SOCS6	ATGAAGAAAATTAGTCTCAAGACCATTCGTAAATCTTTTAACTTAAATAAAAGCAAAGATGACAGTGACTTCGTTGTGGTTGCACAGCCATCATTAAATGATTTTGGAAAAGATGACTCCTTGTTTGCAGGCTGTTATGGTAAAGATTTGGCTACCTGTGACATGAACGGCGAAGATGAGAAAGGTGGCAAAAACAGATCAAAGAGCGAAAGCTTAATGGGTACATTAAAAAGACGACTTTCAGCAAAACAGAAACAAAAAGGTGGAAAGGGCAGCACACCATCTGTGAGCTCTGCTGATGAAGATACCTTTTCTTCTTCTTCTGCTCCAATAACTTTCAAAGAGGTAAGAGCTCAAAGACCTCTTCGGTCCACATCCCTCCGAAACCACCACTATAGT…
XM_007425323.3	Python bivittatus	SOCS6	ATGAAGAAAATTAGTCTCAAGACCATTCGTAAATCTTTTAACTTAAATAAGAGCAAAGATGACAGTGACTTTGTTGTGGTTGCACAGCCATCATTAAATGATTTTGGAAAAGATGACTCCTTGTTTGCTAGCTGTTATGGCAAAGATTTGGCTAGCTGTGACATCAACAGTGAAGATGAGAAAGGTGGCAAAAACAGATCAAAGACTGAAAGCTTAATGGGTACATTAAAAAGACGACTTTCAGCCAAACAGAAGCAAAAAGGTGGCAAGGGCAGCACGCCGTCTGTAAGCTCTGCTGATGAAGATACTTTTTCTTCTTCTTCTGCTCCAATAACTTTCAAAGATGTAAGAGCTCAAAGACCTCTTCGATCCACATCCCTCCGAAATCACCATTATAGT…
XM_014572698.2	Pelodiscus sinensis	SOCS6	ATGAAGAAAATTAGTCTCAAAACAATTCGTAAGTCCTTTAACTTAAATAAAAGCAAAGAAGAAAGTGACTTTGTAGTGGTTCANNNNNNNNAGCAGCCATCATTAAGTGAATTTGGAAAAGATGACTCCTTGTTTGGCAGCTGCTATGGTAAAGATTTGGCTAGCTGTGAAGTTAACTGTGAAGATGAAAAAGGTGCCAAAAATAGATCAAAAAGTGAAAGCTTAATGGGTACGTTAAAAAGAAGGCTTTCAGCAAAACAAAAGCAGAAAGGTAAAAGCAGCACACCATCTGTAAGCTCTGCTGATGATGATACATTTTCTTCCTCATCTGCTCCAATAACCTTTAAAGATGTGAGAGCTCAAAGACCTCTGAGATCAACATCCCTACGTAACCACCAT…
XM_026671979.1	Notechis scutatus	SOCS6	ATGAAGAAAATTAGTCTGAAGACCATTCGTAAATCTTTTAACTTAAATAAAAGCAAAGATGACAGTGACTTTGTTGTAGTTGCACAGCCATCATTAAATGATTTTGGAAATGATGACTCCTTGTTTGCTAGCTGTTATGGTAAAGATTTGGCTAGCTGTGACATCAACAGCGAAGATGAGAAAGGTGGCAAAAACAGATCAAAGAGTGAAAGTTTAATGGGTACATTAAAAAGACGACTTTCAGCAAAACAGAAGCAAAAAGGTGGAAAGGGCAGCACGCCATCCATGAGCTCTGCTGATGAAGATACTTTTTCTTCTTCTTCTGCGCCAATAACTTTCAAAGATGTAAGAGCTCAACGACCTCTTCGGTCCACATCCCTCCGAAACCACCACTATAGT…
XM_019545196.1	Crocodylus porosus	SOCS6	ATGAAGAAAATTAGTCTCAAAACAATTCGCAAGTCCTTTAACTTAAATAAAAGCAAAGATGAAAGTGACTTTGTAGTGGTTCAGCAGCCATCATTAAGCGAATTTGGAAAAGATGACTCCTTGTTTGGAAGCTGTTATGGTAAAGATTTGGCTAGCTGTGAAGTCAACAGTGAAGATGAAAAAGGCAAAAATAGATCAAAAAGTGAAAGCTTAATGGGTACGTTAAAAAGGAGGCTTTCCGCGAAACAAAAGCAGAAAGGCAAAAGTAGCACACCATCTGTAAGCTCTGCTGATGACGACACCTTTTCTTCCTCATCTGCTCCAATAACCTTCAAAGATGTGAGAGCTCAAAGACCATTAAGATCCACATCCCTCCGTAACCACCATTATAGTCCAACT…
XM_019524603.1	Gavialis gangeticus	SOCS6	ATGAAGAAAATTAGTCTCAAAACAATTCGCAAGTCCTTTAACTTAAATAAAAGCAAAGATGAAAGTGACTTTGTAGTGGTTCAGCAGCCGTCATTAAGTGAATTTGGAAAAGATGACTCCTTGTTTGGCAGCTGTTATGGTAAAGATTTGGCTAGCTGTGAAGTCAACAGTGAGGATGAAAAAGGCAAAAATAGATCAAAAAGTGAAAGCTTAATGGGTACGTTAAAAAGGAGGCTTTCCGCGAAACAAAAGCAGAAAGGCAAAGGTAGCACGCCATCTGTAAGCTCTGCTGATGACGACACCTTTTCTTCCTCATCTGCTCCAATAACCTTCAAAGATGTGAGAGCTCAAAGACCATTAAGATCCACATCCCTCCGTAACCACCATTATAGTCCAACT…
XM_027822377.1	Chelonia mydas	SOCS6	ATGAAGAAAATTAGTCTCAAAACAATTCGCAAGTCCTTTAACTTAAATAAAAGCAAAGAAGAAAGTGACTTTGTAGTGGTTCAGCAGCCATCATTAAGTGAATTTGGAAAAGATGACTCCTTGTTTGGCAGCTGCTATGGTAAAGATTTGGCTAGCTGTGAAGTTAACAGTGAAGATGAAAAAGGTGGCAAAAATAGATCAAAAAGTGAAAGCTTAATGGGTACTTTAAAAAGAAGACTTTCAGCAAAACAAAAGCAAAAAGGGAAAGGCAGCACGCCATCTGTAAGCTCTGCTGATGACGATACCTTTTCTTCCTCATCTGCTCCAATAACCTTTAAAGATGTGAGAGCTCAAAGACCTCTAAGATCCACATCTCTCCGTAACCACCATTACAGTCCA…
KB929837.1	Apalone_spinifera	SOCS6	ATGAAGAAAATTAGTCTCAAAACAATTCGTAAGTCCTTTAACTTAAATAAAAGCAAAGAAGAAAGTGACTTTGTAGTGGTTCAGCAGCCATCATTAAGTGAATTTGGAAAAGATGACTCCTTGTTTGGCAGCTGCTATGGTAAAGATTTGGCTAGCTGTGAAGTTAACTGTGAAGATGAAAAAGGTGCCAAAAATAGATCAAAAAGTGAAAGCTTAATGGGTACGTTAAAAAGAAGGCTTTCAGCAAAACAAAAGCAGAAAGGTAAAAGCAGCACACCGTCTGTAAGCTCTGCTGATGATGATACATTTTCTTCCTCATCTGCTCCAATAACCTTTAAAGATGTGAGAGCTCAAAGACCTCTGAGATCCACATCCCTACGTAACCACCATTACAGTCCA…
PKMU01004434.1	Chelonoidis_abingdonii	SOCS6	ATGAAGAAAATTAGTCTCAAAACAATTCGCAAATCCTTTAACTTAAATAAAAGCAAAGAAGAAAGTGACTTTGTAGTGGTTCAGCAGCCATCATTAAGTGAATTTGGAAAAGATGACTCCTTGTTTGGCAGCTGCTATAGTAAAGATTTGGCTAGCTGTGAAGTTAACAGTGAAGATGAAAAAGGTGGCAAAAATAGATCAAAAAGTGAAAGCATAATGGGTACTTTAAAAAGAAGGCTTTCAGCAAAACAAAAGCAGAAAGGGAAAGGCAGCACGCCATCTGTAAGCTCTGCTGATGACGATACCTTTTCTTCCTCATCTGCTCCAATAACCTTTAAAGATGTGAGAGCTCAAAGACCTCTAAGATCCACATCCCTCCGTAATCACCATTACAGTCCA…
LVCR01006107.1	Crotalus_horridus	SOCS6	ATGAAGAAAATTAGTCTCAAGACCATCCGCAAATCTTTTAACTTAAATAAAAGCAAAGATGACAGTGACTTTGTTGTGGTTGCACAGCCATCATTAAATGATTTTGGAAAAGATGACTCCATGTTTGCCAGCTGTTATAGTAAAGATTTGGCTAGTTGTGACATCAACAGTGAAGACGAGAAAGGTGGCAAAAGCAGATCAAAGACTGAAAGCTTAATGGGTACATTAAAAAGACGACTTTCAGCAAAACAGAAGCAAAAAGGTGGAAAGGGGAGCACGCCATCCGTGAGCTCTGCTGATGAAGATACCTTTTCTTCTTCTTCTGCTCCAATAACTTTCAAAGATGTAAGAGCTCAAAGACCTCTTCGATCCACATCCCTCCGAAACCACCATTACAGT…
JPMF01092148.1	Crotalus_pyrrhus	SOCS6	ATGAAGAAAATTAGTCTCAAGACCATCCGCAAATCTTTTAACTTAAATAAAAGTAAAGATGACAGTGACTTTGTTGTGGTTGCACAGCCATCATTAAATGATTTTGGAAAAGATGACTCCATGTTTGCCAGCTGTTATAGTAAAGATTTGGCTAGTTGTGACATCAACAGTGAAGACGAGAAAGGTGGCAAAAGCAGATCAAAGACTGAAAGCTTAATGGGTACATTAAAAAGACGACTTTCAGCAAAACAGAAGCAAAAAGGTGGAAAGGGGAGCACGCCATCCGTGAGCTCTGCTGATGAAGATACCTTTTCTTCTTCTTCTGCTCCAATAACTTTCAAAGATGTAAGAGCTCAAAGACCTCTTCGATCCACATCCCTCCGAAACCACCATTACAGT…
PDHV01001047.1	Crotalus_viridis	SOCS6	ATGAAGAAAATTAGTCTCAAGACCATCCGCAAATCTTTTAACTTAAATAAAAGTAAAGATGACAGTGACTTTGTTGTGGTTGCACAGCCATCATTAAATGATTTTGGAAAAGATGACTCCATGTTTGCCAGCTGTTATAGTAAAGATTTGGCTAGTTGTGACATCAACAGTGAAGACGAGAAAGGTGGCAAAAGCAGATCAAAGACTGAAAGCTTAATGGGTACATTAAAAAGACGACTTTCAGCAAAACAGAAGCAAAAAGGTGGAAAGGGGAGCACGCCATCCGTGAGCTCTGCTGATGAAGATACCTTTTCTTCTTCTTCTGCTCCAATAACTTTCAAAGATGTAAGAGCTCAAAGACCTCTTCGATCCACATCCCTCCGAAACCACCATTACAGT…
ML123181.1	Cuora_mccordi	SOCS6	ATGAAGAAAATTAGTCTCAAAACAATTCGCAAATCCTTTAACTTAAATAAAAGCAAAGAAGAAAGTGACTTTGTAGTGGTTCAGCAGCCATCATTAAGTGAATTTGGAAAAGATGACTCCTTGTTCGGCAGCTGCTATGGTAAAGATTTGGCTAGCTGTGAAGTTAACAGTGAAGATGAAAAAGGTGGCAAAAATAGATCAAAAAGTGAAAGCTTAATGGGTACTTTAAAAAGAAGGCTTTCAGCAAAACAAAAGCAGAAAGGGAAAGGCAGCACGCCATCTGTAAGCTCTGCTGATGACGATACCTTTTCTTCCTCATCTGTTCCAATAACCTTTAAAGATGTGAGAGCTCAAAGACCTCTAAGATCCACATCCCTCCGTAACCACCATTACAGTCCA…
PPEB01003620.1	Gopherus_agassizii	SOCS6	ATGAAGAAAATTAGTCTCAAAACAATTCGCAAATCCTTTAACTTAAATAAAAGCAAAGAAGAAAGTGACTTTGTAGTGGTTCAGCAGCCATCATTAAGTGAATTTGGAAAAGATGACTCCTTGTTTGGCAGCTGCTATGGTAAAGATTTGGCTAGCTGTGAAGTTAACAGTGAAGATGAAAAAGGTGGCAAAAATAGATCAAAAAGTGAAAGCTTAATGGGTACTTTAAAAAGAAGGCTTTCAGCAAAACAAAAGCAGAAAGGGAAAGGCAGCACGCCATCTGTAAGCTCTGCTGATGACGATACCTTTTCTTCCTCATCTGCTCCAATAACCTTTAAAGATGTGAGAGCTCAAAGACCTCTAAGATCCACATCCCTCCGTAACCACCATTATAGTCCA…
RSAE01538807.1	Hydrophis_cyanocinctus	SOCS6	ATGAAGAAAATTAGTCTGAAGACCATTCGTAAATCTTTTAACTTAAATAAAAGCAAAGATGACAGTGACTTTGTTGTAGTTGCACAGCCATCATTAAATGATTTTGGAAATGATGACTCCTTGTTTGCTAGCTGTTATGGTAAAGATTTGGCTAGCTGTGACATCAACAGCGAAGATGAGAAAGGTGGCAAAAACAGATCGAAGAGTGAAAGTTTAATGGGTACATTAAAAAGACGACTTTCAGCAAAACAGAAGCAAAAAGGTGGAAAGGGCAGCACGCCATCCGTGAGCTCTGCTGATGAAGATACTTTTTCTTCTTCTTCTGCACCAATAACTTTCAAAGATGTAAGAGCTCAACGACCTCTTCGGTCCACATCCCTCCGAAACCACCACTATAGT…
RSAD01108534.1	Hydrophis_hardwickii	SOCS6	ATGAAGAAAATTAGTCTGAAGACCATTCGTAAATCTTTTAACTTAAATAAAAGCAAAGATGACAGTGACTTTGTTGTAGTTGCACAGCCATCATTAAATGATTTTGGAAATGATGACTCCTTGTTTGCTAGCTGTTATGGTAAAGATTTGGCTAGCTGTGACATCAACAGCGAAGATGAGAAAGGTGGCAAAAACAGATCGAAGAGTGAAAGTTTAATGGGTACATTAAAAAGACGACTTTCAGCAAAACAGAAGCAAAAAGGTGGAAAGGGCAGCACGCCATCCGTGAGCTCTGCTGATGAAGATACTTTTTCTTCTTCTTCTGCACCAATAACTTTCAAAGATGTAAGAGCTCAACGACCTCTTCGGTCCACGTCCCTCCGAAACCACCACTATAGT…
OFHV01001723.1	Lacerta_bilineata	SOCS6	ATGAAGAAAATTAGTCTCAAGACCATTCGCAAGTCTTTTAATTTAAATAAGAGCAAAGATGAAAGTGACTTCGTTGTAGTTGCACAGCCATCGTTAAATGATTTTGGAAAAGATGACTCCTTGTTTGGTAGCTGCTATGGTAAAGATTTGCCAAGCTGTGACATCAACAGTGAAGATGAGAAAGGTGGAAAAAACAGATCGAAGAGTGAAAGCTTAATGGGTACATTAAAAAGAAGGCTTTCAGCAAAACAAAAGCAGAAAGGCGGCAAAGGTAGCACGCCATCTGTTAGCTCTGCTGATGATGACACCTTCTCTTCTTCTTCTGCTCCAATAACCTTCAAAGATGTGAGAGCTCAGAGACCTCTTAGATCTACATCCCTCCGAAATCACCATTATAGC…
OFHU01000052.1	Lacerta_viridis	SOCS6	ATGAAGAAAATTAGTCTCAAGACCATTCGCAAGTCTTTTAATTTAAATAAGAGCAAAGATGAAAGTGACTTCGTTGTAGTTGCACAGCCATCGTTAAATGATTTTGGAAAAGATGACTCCTTGTTTGGTAGCTGCTATGGTAAAGATTTGCCGAGCTGTGACATCAACAGTGAAGATGAGAAAGGTGGAAAAAACAGATCGAAGAGTGAAAGCTTAATGGGTACATTAAAAAGAAGGCTTTCAGCAAAACAAAAGCAGAAAGGCGGCAAAGGTAGCACGCCATCTGTTAGCTCTGCTGATGATGACACCTTCTCTTCTTCTTCTGCTCCAATAACCTTCAAAGATGTGAGAGCTCAGAGACCTCTTAGATCTACATCCCTCCGAAATCACCATTATAGC…
MDXI01013077.1	Malaclemys_terrapin	SOCS6	ATGAAGAAAATTAGTCTCAAAACAATTCGCAAGTCCTTTAACTTAAATAAAAGCAAAGAAGAAAGTGACTTTGTAGTGGTTCAGCAGCCATCATTAAGTGAATTTGGAAAAGATGACTCCTTGTTTGGCAGCTGCTATGGTAAAGATTTGGCTAGCTGTGAAGTTAACAGTGAAGATGAAAAAGGTGGCAAAAATAGATCAAAAAGTGAAAGCTTAATGGGTACTTTAAAAAGAAGGCTTTCAGCAAAACAAAAGCAGAAAGGGAAAGGCAGCACACCATCTGTAAGCTCTGCTGATGACGATACCTTTTCTTCCTCATCTGCTCCAATAACCTTTAAAGATGTGAGAGCTCAAAGACCTCTAAGGTCCACATCCCTCCGTAACCACCATTACAGTCCA…
AZIM01001983.1	Ophiophagus_hannah	SOCS6	ATGAAGAAAATTAGTCTGAAGACCATTCGTAAATCTTTTAACTTAAATAAAAGCAAAGATGACAGTGACTTTGTTGTAGTTGCACAGCCATCATTAAATGATTTTGGAAAAGATGACTCCTTGTTTGCTAGCTGTTATGGTAAAGATTTGGCTAGCTGTGACATCAGCAGCGAAGATGAGAAAGGTGGCAAAAACAGATCAAAGAGCGAAAGTTTAATGGGTACATTAAAAAGACGACTTTCAGCAAAACAGAAGCAAAAAGGTGGAAAGGGCAGCACGCCATCCATGAGCTCTGCTGATGAAGATACTTTTTCTTCTTCTTCTGCACCAATAACTTTCAAAGATGTAAGAGCTCAACGACCTCTTCGGTCCACATCCCTCCGAAACCATCACTATAGT…
JTLQ01008428.1	Pantherophis_guttatus	SOCS6	ATGAAGAAAATTAGTCTCAAGACCATTCGTAAATCTTTTAACTTAAATAAAAGCAAAGATGACAGTGACTTTGTTGTGGTTGCACAGCCATCATTAAATGATTTTGGAAAAGATGACTCCTTGTTTGCTAGCTGTTATAGTAAAGATTTGGCTACCTGTGACATCAACGGCGAAGATGAGAAAGGTGGCAAAAACAGATCAAAGAGCGAAAGCTTAATGGGTACATTAAAAAGACGACTTTCTGCAAAACAGAAGCAAAAAGGTGGAAAGGGCAGCACGCCATCCGTGAGCTCTGCTGATGAAGATACCTTTTCTTCTTCTTCTGCTCCAATAACTTTCAAAGATGTAAGAGCTCAAAGACCTCTTCGGTCCACATCCCTCCGAAACCACCATTATAGT…
BDOT01000040.1	Paroedura_picta	SOCS6	ATGAAGAAAATAAGTCTGAAGACCATTCGTAAGTCTTTCAATTTAAATAAAAGCAAAGATGATAATGACTTTGTTGTGGTTACGCAGCCATCTCTAAGTGATTTTGGAAAAGACGAATCCTTGTTTGGTAGCTGTTATGGTAAGGATTTGGCTAGCTGTGATGTCAACAGTGAAGATGAAAAAGGTGGCAAAAACCGCTCGAAGAGTGAAAGTTTAATGGGTACTTTAAAACGGAGACTTTCAGCAAAACAAAAGCAGAAGGGCAAAGGCAGTACACCTTCTGTTAGCTCTGCTGATGATGACACATTTTCTTCGTCTTCTGCTCCAATAAACTTCAAAGATGTGAGAGCTCAAAGACCTCTTCGATCCACATCCCTCCGTAATCACCATTATAGTCCA…
QXTE01000063.1	Platysternon_megacephalum	SOCS6	ATGAAGAAAATTAGTCTCAAAACAATTCGCAAGTCCTTTAACTTAAATAAAAGCAAAGAAGAAAGTGACTTTGTAGTGGTTCAGCAGCCATCATTAAGTGAATTTGGAAAAGATGACTCCTTGTTTGGCAGCTGCTATGGTAAAGATTTGGCTAGCTGTGAAGTTAACAGTGAAGATGAAAAAGGTGGCAAAAATAGATCAAAAAGTGAAAGCTTAATGGGTACTTTAAAAAGAAGGCTTTCAGCAAAACAAAAGCAGAAAGGGAAAGGCAGCACGCCATCTGTAAGCTCTGCTGATGACGATACCTTTTCTTCGTCATCTGCTCCAATAACCTTTAAAGATGTGAGAACTCAAAGACCTCTAAGGTCCACATCCCTCCGTAACCACCATTACAGTCCA…
CM014749.1	Podarcis_muralis	SOCS6	ATGAAGAAAATTAGTCTCAAGACCATTCGTAAGTCTTTTAATTTAAATAAGAGCAAAGATGAAAGTGACTTCGTTGTAGTTGCACAGCCATCGTTAAATGATTTTGGAAAAGATGACTCCTTGTTTGGTAGCTGCTATGGTAAAGATTTGCCGAGTTGTGACATCAACAGTGAAGATGAGAAAGGTGGAAAAAACAGATCGAAGAGTGAAAGCTTAATGGGTACGTTAAAAAGGCGGCTTTCAGCAAAACAAAAGCAGAAAGGCGGCAAAGGTAGCACGCCATCTGTTAGCTCTGCTGATGACGACACCTTCTCTTCTTCTTCTGCTCCAATAACCTTCAAAGATGTGAGAGCTCAGAGACCTCTTAGATCTACATCCCTCCGAAATCACCATTATAGC…
BFFQ01003346.1	Protobothrops_flavoviridis	SOCS6	ATGAAGAAAATTAGTCTCAAGACCATCCGCAAATCTTTTAACTTAAATAAAAGCAAAGATGACAGTGACTTCGTTGTGGTTGCACAGCCATCATTAAATGATTTTGGAAAAGATGACTCCATGTTTGCCAGCTGTTATAGTAAAGATTTGGCTAGTTGTGACATCAACAGCGAAGACGAGAAAGGTGGCAAAAACAGATCAAAGCCTGAAAGCTTAATGGGTACATTAAAAAGACGACTTTCAGCAAAACAGAAGCAAAAAGGTGGAAAGGGGAGCACGCCATCCGTGAGCTCTGCTGATGAAGATACCTTTTCTTCTTCTTCTGCTCCAATAGCTTTCAAAGATGTAAGAGCTCAAAGACCTCTTCGATCCACATCCCTCCGAAACCACCATTACAGT…
QVOM02000049.1	Salvator_merianae	SOCS6	ATGAAGAAAATTAGTCTTAAGACTATTCGTAAGTCATTTAATCTGAATAAAAACAAGGATGACAGTGACTTCGTTGTAGTCACTCAGCCATCATTAAATGATTTTGGAAAAGATGATTCCTTATTTGGTGGCTGCTATGGTAAAGATCTGGCTAGCTGTGATATCAACAGTGAAGACGAGAAAGGTGGCAAAAACAGATCAAAGAGTGAAAGCTTAATGGGTACGTTAAAAAGAAGACTTTCGGCAAAACAAAAGCAGAAAGGTGGTAAGGGCAGCACACCATCTGTTACTTCTGCTGATGACGACACCTTTTCCTCCTCTTCTGCTCCCATAACCTTCAAAGATGTGAGAGGTCAAAGACCTCTTCGATCCACATCACTTCGAAATCACCATTATAGT…
QEPC01009674.1	Sphenodon_punctatus	SOCS6	ATGAAGAAAATTAGTCTCAAGACAATTCGCAAGTCCTTTAACTTAAATAAAAGCAAAGATGAAAGTGACTTTGTAGTGGTTCAGCAGCCATCGCTAAATGAATTTGGAAAAGATGACTCTTTGTTTGGCAGCTGCTATGGTAAAGATCTGGCTAGCTGTGAAGTCAACAGTGAAGATGAAAAAGGTGGCAAAAACAGATCAAAAAGTGAAAGTTTAATGGGTACGCTAAAAAGGAGGCTTTCAGCAAAACAAAAGCAGAAAAGCAAAGGCAGCACACCATCTGTAAGCTCTGCTGATGATGACACCTTTTCTTCCTCATCTGCTCCAATAACTTTTAAAGACGTGAGAGCTCAAAGGCCTCTAAGATCCACATCCCTCCGTAACCATCACTATAGTCCA…
QLTV01001502.1	Thermophis_baileyi	SOCS6	ATGAAGAAAATTAGTCTCAAGACCATTCGTAAATCTTTTAACTTAAATAAAAGCAAAGATGACAGTGACTTTGTTGTGGTTGCACAGCCATCATTAAATGATTTTGGAAAAGATGACTCCTTGTTTGCTAGCTGTTATGGTAAAGATTTGGCTACCTGTGACATCAACGGCGAAGATGAGAAAGGTGGCAAAAACAGATCAAAGAGCGAAAGCTTAATGGGTACATTAAAAAGACGACTCTCAGCAAAACAGAAGCAAAAAGGTGGAAAGGGCAGCACGCCATCCGTGAGCTCTGCTGATGAAGATACCTTTTCTTCTTCTTCTGCTCCAATAACTTTCAAAGATGTAAGAGCTCAAAGACCTCTTCGGTCCACATCCCTCCGAAACCACCATTATAGT…
KN635678.1	Vipera_berus	SOCS6	ATGAAGAAAATTAGTCTCAAGACCATCCGCAAATCTTTTAACTTAAATAAAAGCAAAGATGACAGTGACTTTGTTGTGGTTGCACAGCCATCATTAAATGATTTTGGAAAAGATGAATCCATGTTTGCCAGCTGTTATAGTAAAGATTTGGCTAGTTGTGACATCAACAGCGAAGACGAGAAAGGTGGCAAAAACAGATCAAAGACTGAAAGCTTAATGGGTACATTAAAAAGACGACTTTCAGCAAAACAGAAGCAAAAAGGTGGAAAGGGCAGCACGCCATCCGTGAGCTCTGCTGATGAAGATACTTTTTCTTCTTCTTCTGCTCCAATAACTTTCAAAGATGTAAGAGCTCAAAGACCTCTTCGATCCACATCCCTCCGAAACCACCATTACAGT…
XM_026710672.1	Pseudonaja_textilis	SOCS7	ATGCAACGGGCCGGAGGAGGAGCGGCCGCAGCAGCAGCAGAGCCCGGAGGAGGAGGTGACAACGGCGGCGAGGCGGTTGCAGCAGCAGCGGCCTCTTATCGGGTATTGAGTCGCTTACTGGGGTACGGCGGAGCAGAGTCAGCAGCCGCCGGCTTGGGGTTGAGCAGAGCTGTCGGAGAGACTGCCGCTATTGCAACTCGGGAACGCGGAAGGGCGGGCGGGTTGCGGGGCTCGCAGCTTCTGGTCTTCCGCCCTGGAGAAACCGGGGAGTCCTCGGCTGGGTCCCCAGTTGGCTGTCTGCCTCCGCCGCCACCGCCACTGCCTCAGCCACCCCCGTCGGAGCTCCTGTGCGCTAGGCATCGTTGTGCTCTCCTAGATGCTCCTAAGGGCGAGCCAGGA…
XM_020785517.1	Pogona_vitticeps	SOCS7	ATGTCAAATTTGAAAGGGATCGCTTTTGAAGGCGGGCGTGGCTCTTCCCCAACGGGGGCGTGGCCGAGCGAAAGGGGGAGGGCTCGACTGGAGCGGAGGGCGTGGCTTGCCGCGGCCTCGTACCGGGTGCTGAGCCGTTTGCTCGGCTATGGCGGGGCCGAGTCAGGGGCAGCTGGGCTGGCGCTCGGGGGAGGCGTTGGCGAGACCGCTGCCCTCGCGGTTGGCGACCGGGGGAGGACGGGCGGGCTGCGAGGCTCGCAGCTCTTGGTCTTCCGCCCGGGCGAAGCCGGAGAGCCGTCGGGGGTCACCCGGGGAGCTGGATTGCCGCCGACGGCGCCGCCGCCGCCTCAAGCGACCTCGGAGCTCTTGTGCGCCAGGCACCGGTGCGCCCTCTTGGAC…
XM_015810399.1	Protobothrops_mucrosquamatus	SOCS7	ATGCAACGGGCCGGAGGAGGAGGAGCGGCCGCAGCAGCAGCAGAGCCCGGAGGAGGCAGTGGGAGAGGAGGTGACAACGGCGGTGAGGCGGTTGCAGCAGCTGCGGCCTCTTATCGGGTGCTGAGTCGCTTGCTGGGATACGGCGGAGCAGAGTCAGCCGCAGCCGACTTGGGGCTGGCCAGAGCTGTTGGAGAGACTGCAGCTATTGCAACTCGGGATCGCGGAAGGGCGGGCGGGTTGCGGGGCTCGCAGCTTCTGGTCTTCCGCCCTGGAGAAACTGGAGAACCTTCGGCAGGGTCCCCAGCCGGCTGTCTGCCGCCGCCGCCGCCGCCACTGCCTCAGCCACCGCCGTCGGAGCTCCTGTGCGCTAGGCATCGGTGCGTTCTCCTGGATGCTCCG…
XM_015412428.1	Gekko_japonicus	SOCS7	ATGCAGCGGGGCGGAGGAGGAGCGGCGGCGGCGGCGGCAGCAGCGACAGCGGAGCCTGGAGGAGGCGGCGGAGGCGAGGCGGTTGCAGCGGCGGCGGCCTCGTACCGGGTGCTGAGTCGTTTGCTGGGCTACGGCGGGGCTGAGTCCGCCGCAGCGCCCCCGACGGCTCCGGGAGGGCCGGGCAAGGCTGCCGGCGACTGCCCGTGCCTGAGTCTCCTGCCTCCGCCGCCTCTAGCCCCGCCGCCCACTCTGCCCTTGCTGCCCCCGGGGGAGGAGACCAGCGACGCCCTCCTGGTGCTCGAAGCCCTCGGCCCCGACGAGGAGGACGAAGAGGAAGAGACAGGGCAGGGAGATGCCTCCAGCCAAGCCTGCGTGGGGGGCAGCCGCTTCCAAGCGCCC…
XM_014057860.1	Thamnophis_sirtalis	SOCS7	ATGCAACGGGCCGGAGGAGGAGCGGCCGCAGCAGCAGCAGCAGCCGCCGCCGAGCCTGGAGGAGGCAGTGGGAGAGGAGGTGACAACGGCGGCGAGGCGGTTGCAGCAGCAGCGGCCTCTTATCGGGTGCTGAGTCGCTTGCTGGGGTACGGCGGACCAGAGTCAGCTGCAGCTGGCTTGGGGCTGGGCAGAGGTGTTGTAGAGACTGCCGCTATTGCAACTCGGGATCGCGGCAGGGCGGGCGGGTTGCGGGGCTCGCAGCTTCTGGTCTTCCGCCCGGGAGAAACTGGGGAGACCTCGGCGGGGTCCCCAGCCGGCTGTCTGCCTCCGGCGCCGCCGCCACTGCCTCAGCCACCCCCGCCGGAGCTCCTGTGCGCTAGGCATCGGTGTGCTCTCCTA…
XM_007422005.1	Python_bivittatus	SOCS7	ATGAGCCTCCTGCCTCAGCCGGCGATGGCCCCGCCGCCCGCTCTGCCCCTGTTGCCCCCGGGAGAGGAGACCAGCGACGCCCTGCTGGTGCTAGAAGCTCTGGGCCCTGACGACGAGGACGAAGAGGAGGCGGCCGCGGGGCAGGCCCCCAGCTCCTCGGCCCCCTCCAGGAAAGGCTCCTTGAAGGTTCGCCTGAGCCGCCTCTTCCGCACCAAGAGCTGCAGTGGGCCGTCCTGCAACCCCGGGGCTGCCGCCAGCGCACGCCGGATCGGAGAGAGGGACCTGCTGCAAGCCGCTGCCGCCCCGGCTCCCTCGGGCACGGCAGGAAGCCTTCCCGATGTGTCTCAGCCTGGGTACCGAGAGCAGGACTCGAGCAGAAAACAAAGATTGATGCGAACA…
XM_014574111.2	Pelodiscus_sinensis	SOCS7	GGGGGCAGGGGCCGCTGGGGGGAGCTGCCCGCCTCGGCCGGGAGCCTGAACGACGTGTCCAGCGCCAGGGGCCGGGAGCAGGACTCGGGCAGGAAACCCCGACTGACAAGAACTCAAAGTGCCTTTTCTCCGGTTGCTTTCAGCCCTCTCTTCACAGGGGAAACTGTGTCACTCGTGGATGTGGACATCTCCCAGCGAGGACTGACCTCCCCTCACCCTCCGACGCCTCCGCCTCCGCCCCGGAGAAGCCTCAGCCTTCTAGATGATATCTGTGGAACGCTGCCTACGTCCGTTCTAGTGGGTCCGATGGGGTCCTCCCTGCAGTCTTTCCCTCTGCCTCCGCCGCCTCCACCCCACGCTCCAGATGCGTTTCCCCGCATTGTCCCGTTCAGAGCGATG…
XM_006034980.2	Alligator_sinensis	SOCS7	GCCGCCGACAGGAGGCGCTCGGGGGACCTGCCCGCCTCAGCTGGGAGCCTCACCGACGTGTCCAGCGCCAGGGGCCGGGAGCAGGATGCGGGCAGGAAACCCAGATTGACGAGAACTCAAAGTGCCTTTTCTCCGGCCGCTTTCAGCCCCCTCTTCACAGGTGAAACTGTGTCACTAGTGGATGTGGACATCTCTCAGCGAGGACTGACCTCTCCTCACCCTCCGACTCCTCCACCTCCGCCACGAAGAAGCCTCAGCCTGCTAGATGATATCAGTGGGACGCTGCCTACATCTGTCCTAGTGGGTCCGATGGGGTCTTCCCTGCAGTCTTTCCCTCTGCCTCCGCCTCCTCCACCCCATGCCCCAGATGCGTTTCCGCGTATTGTCCCACTCCGACCG…
XM_005301972.1	Chrysemys_picta_bellii	SOCS7	ATGTTACGGGCGTCCTCAGAGCTCTTTCTCTTTCTCAATAGGAAACCCCGATTGACAAGAACTCAAAGTGCCTTTTCTCCGGTTGCTTTCAGCCCCCTCTTCACAGGTGAAACTGTGTCACTAGTGGATGTGGACATCTCCCAGCGAGGACTGACCTCGCCTCACCCTCCGACTCCTCCACCTCCACCACGGAGAAGCCTCAGCCTGCTAGATGATATCAGTGGGACGCTGCCTACATCTGTTCTAGTGGGTCCGATGGGGTCTTCCCTGCAGTCTTTCCCTCTGCCTCCGCCTCCTCCACCCCATGCCCCAGATGCGTTTCCCCGGATCGTCCCGTTCAGACCGTCCGAGGCAGTGATCAGCCAGACCACCCAGCATCTTCACTGTCCTCTCTACCGA…
XM_008113428.2	Anolis_carolinensis	SOCS7	ATGCAATGCGCCGCCTCTCGTAGCGCCATGCAGCGGGCCGGAGGAGGGGGAGGAGCGGCCGCATCAGCGGCGGAGCCTGGAGGCGAGGCTGTTGCTGCGGCCGCGGCCTCCTACCGCGTCCTGAGCCGTTTCCTGGGCTACGGCGGCCCCGAGTCCGCCTCAGCCGTGGGCGACGAGGCAACGGGCGGCTTGAGGGGCTCGCAGCTCTTGGTCTTCCGGCCTGGTGAGGCGGCGGTGTCCCCGGCCTTGCCTCCGCCTCAGCAGCCGCCTCCTCCTCCGCCTCCTCCACCGCCAGAGCTGCTTTGCGCCCCTCAGAAAGGATGCCACTGCCAACCTGCAGCCGGGCGGTGCTGGAACGGCGCGGCCGGCGGCCTACTCTTCCCTCCAGGCGCCGGCCTC…
XM_026669712.1	Notechis_scutatus	SOCS7	ATGCAACGGGCCGGAGGAGGAGCGGCCGCAGCAGCAGCAGAGCCCGGAGGAGGAGGTGACAACGGCGGCGAGGCGGTTGCAGCAGCAGCGGCCTCTTATCGGGTGTTGAGTCGCTTACTGGGGTACGGCGGAGCAGAGTCAGCCGCCGCCGGCTTGGGGTTGAGCAGAGCTGTCGGAGAGACTGCCGCTATTGCAACTCGGGATCGCGGAAGGGCGGGCGGGTTGCGGGGCTCGCAGCTTCTGGTCTTCCGCCCTGGAGAAACCGGAGAGTCCTCGGCTGGGTCCCCAGTTGGCTGTCTGCCTCCTCCGCCACCGCCACTGCCTCAGCCACCCCCGTCGGAGCTCCTGTGTGCTAGGCATCGTTGTGCTCTCCTGGATGCTCCTAAGGGCGAGCCAGGA…
XM_026654666.1	Terrapene_mexicana	SOCS7	ATGTTACTGGCCGCAGGTCCCACAGAGAGTCAGGAAGAGGACCCAGATCCCCTGAAGCACGGCCGTGAGCTGCAGCGGCTAGCCCGTGCGGCCAGCTCCCGCTGCCGCCTCCCCATCAGCACACCGAGGCTCTTTCTCTTTCTCAATAGGAAACCCCGATTGACAAGAACTCAAAGTGCCTTTTCTCCGGTTGCTTTCAGCCCCCTCTTCACAGGTGAAACTGTGTCACTAGTGGATGTGGACATCTCCCAGCGAGGACTGACCTCGCCTCACCCTCCGACTCCTCCACCTCCGCCACGGAGAAGCCTCAGCCTGCTAGATGATATCAGTGGGACGCTGCCTACATCTGTTCTAGTGGGTCCGATGGGGTCTTCCCTGCAGTCTTTCCCTCTGCCTCCG…
XM_019550247.1	Crocodylus_porosus	SOCS7	ATGGGGGCGGGAGGCGGGCCCCGCCGGGGGTCTCTAAAAGTCCGCCTCAGCCGCCTCTTCCGCACCAAGAGCTGCAGCGACCCTGCTGCAGCTGCTGCCGCAGCTGCCGACAGAAGGCGCTCGGGGGAGCTGCCCACCTCAGCTGGGAGCCTCACTGATGTGTCCAGTGCCAGGGGCCGGGAGCAGGATGTGGGCAGGAAACCCAGATTGATGAGAACTCAAAGTGCCTTTTCTCCGGCCGCTTTTAGCCCCCTCTTCACAGGTGAAACTGTGTCACTAGTGGATGTGGACATCTCTCAGCGAGGACTGACCTCTCCTCACCCTCCGACTCCTCCACCTCCGCCACGAAGAAGCCTCAGCCTGCTAGATGATATCAGTGGGACGCTGCCTACATCTGTC…
XM_019505195.1	Gavialis_gangeticus	SOCS7	ATGAACGCAGATGGTGTTCATAAACACAGTGCCTTATTCACGGATTTCGCCATTTGCAGGGGATATGAGAACGGGCGGCCACGCTGGGCCGGCCTGGAGCTGCAGCTGGCGGCGCTGGAGCTGCAGCCGGGCGGCAAGAAGAGCCCGTGCCCCGGCCCCTGCCCCTGCCTGCTACCCGCCCCCGCGGCCGAGGAGACCAGCGACGCGCTGCTGGTGCTGGAGGCGCTGGAGCCCGACGAGGCTGGCAGCTGCTCCGAGGACGACCCGGCGAGCCCTGCCCGGGCACCCACCGAGCCGCAGCCCCTGGTGTCTGCCCCAGGGGGGAGGCCTGTGAGCCGCCCGCCGCCAGGCATGGGGGCGGGAGGCGGGCCCCGCCGGGGGTCTCTAAAAATCCGCCTC…
XM_019482497.1	Alligator_mississippiensis	SOCS7	GGCGCGGGGGAGGCGCCGCCGCGCTGGGCCGGGCTGGAGCTGCAGCTGGCGGCGCTGGAGCTGCAGCCGGGCGGCAAGAAGAGCCCGTGCCCCGGCCCCTGCCCCTGCTTGCTGCCCGCCCCCGCGGCCGAGGAGACCAGCGACGCGCTGCTGGTGCTGGAGGCGCTGGAGCCCGACGAGGCTGGCAGCTGCTCCGAGGATGACCCGGCCAGCCCTGCCCGGGCCCCTGCCGAGCCACAGCCCCCAGCGCCTGTCCCAGGTGGGAGGCCCGCGAGCCGCCTGCTGCCGGGCATGGGGGCAGGGGTTGGGCCCCGCCGGGGGTCTCTGAAAATCCGCCTCAGCCGCCTCTTCCGCACCAAGAGTTGCAGCGACCCAGCTGCGGCTGCTGCTGCCGACAGG…
KN635678.1+KN638387.1	Vipera_berus	SOCS7	ATGCAACGGGCCGGAGGAGGAGGAGCGGCCGCAGCAGCAGCAGAGCCCGGAGGAGGCAGTGGGAGAGGAGGTGACAACGGCGGTGAGGCGGTTGCAGCAGCTGCGGCCTCTTATCGGGTGCTGAGTCGCTTGCTGGGGTACGGCGGAGCAGAGTCAGGCGCAGCCGGCTTGGGGCTGGGCAGAGCTGTTGGAGAGACTGCCGCTATTGCAACTCGAGATCGCGGAAGGGCGGGTGGGTTGCGGGGCTCGCAGCTTCTGGTCTTCCGCCCGGGAGAAACTGGAGAACCTTCGGCAGGGTCCCCAGCCGGCTATCTGCCGCCGCCGCCGCCGCCACTGCCTCAGCCACCGCCGTCGGAGCTCCTGTGCGCTAGGCATCGGTGCGCTCTCCTGGATGCTCCG…
QLTV01001726.1	Thermophis_baileyi	SOCS7	ATGCAACGGGCCGGAGGAGGAGGAGCGGCCGCAGCAGCAGCAGCAGCAGCAGCAGCAGCAGCCGAGCCCGGAGGAGGCAGTGGGAGAGGAGGTGACAACGGCAGCGAGGCGGTTGCAGCAGCAGCGGCCTCTTATCGGGTGCTGAGTCGCTTGCTGGGGTACGGCGGACCAGAGTCAGCCGCAGCCGGCTTGGGGCTGAGCAGAGCTGTTGGAGAGACTGCCGCTATTGCAACTCGGGATCGCGGAAGGGCGGGCGGGTTGCGGGGCTCGCAGCTTCTGGTCTTCCGCCCCGGAGAAACCGGAGAGCCCTCGCCGGGGTCCCCAGTCGGTTGTCTGCCTCCCCCGCCGCCGCCACTTCCTCAGCCACCCCCGTCGGAGCTCCTGTGCGCTAGGCATCGG…
LVCR01004280.1	Crotalus_horridus	SOCS7	ATGCAACGGGCCGGAGGAGGAGGAGCGGCCGCAGCAGCAGCAGAGCCCGGAGGAGGCAGTGGGAGAGGAGGTGACAACGGCGGTGAGGCGGTTGCAGCAGCTGCGGCCTCTTATCGGGTGCTGAGTCGCTTGCTGGGGTACGGCGGAGCGGAGTCAGCCGCAACCGGCTTGGGGCTGGGCAGAGCTGTTGGAGAGACTGCCGCTATTGCAACTCGGGATCGCGGAAGGGCGAGCGGGTTGAGGGGCTCGCAGCTTCTGGTCTTCCGCCCTGGAGAAACTGGAGAACCTTCGGCAGGGTCCCCAGCCGGTTGTCTGCCGCCGCCGCCGCCGCCACTGCCTCAGCCACCGCCGTCGGAGCTCCTGTGCGCTAGGCATCGGTGCGCTCTCCTGGATGCTCCG…
JPMF01020792.1+JPMF01175342.1+JPMF01178073.1	Crotalus_pyrrhus	SOCS7	ATGCAACGGGCCGGAGGAGGAGGAGCGGCCGCAGCAGCAGCAGAGCCCGGAGGAGGCAGTGGGAGAGGAGGTGACAACGGCGGTGAGGCGGTTGCAGCAGCTGCGGCCTCTTATCGGGTGCTGAGTCGCTTGCTGGGGTACGGCGGAGCAGAGTCAGCCGCAACCGGCTTGGGGCTGGGCAGAGCTGTTGGAGAGACTGCCGCTATTGCAACTCGGGATCGCGGAAGGGCGAGCGGGTTGAGGGGCTCGCAGCTTCTGGTCTTCCGCCCTGGAGAAACTGGAGAACCTTCGGCAGGGTCCCCAGCCGGTTGTCTGCCGCCGCCGCCGCCGCCACTGCCTCAGCCACCGCCGTCGGAGCTCCTGTGCGCTAGGCATCGGTGCGCTCTCCTGGATGCTCCG…
PDHV01001436.1	Crotalus_viridis	SOCS7	ATGCAACGGGCCGGAGGAGGAGGAGCGGCCGCAGCAGCAGCAGAGCCCGGAGGAGGCAGTGGGAGAGGAGGTGACAACGGCGGTGAGGCGGTTGCAGCAGCTGCGGCCTCTTATCGGGTGCTGAGTCGCTTGCTGGGGTACGGCGGAGCAGAGTCAGCCGCAACCGGCTTGGGGCTGGGCAGAGCTGTTGGAGAGACTGCCGCTATTGCAACTCGGGATCGCGGAAGGGCGAGCGGGTTGAGGGGCTCGCAGCTTCTGGTCTTCCGCCCTGGAGAAACTGGAGAACCTTCGGCAGGGTCCCCAGCCGGTTGTCTGCCGCCGCCGCCGCCGCCACTGCCTCAGCCACCGCCGTCGGAGCTCCTGTGCGCTAGGCATCGGTGCGCTCTCCTGGATGCTCCG…
RSAE01099117.1	Hydrophis_cyanocinctus	SOCS7	ATGCAACGGGCCGGAGGAGGAGCGGCCGCAGCAGCAGCAGAGCCCGGAGGAGGTGGTGACAACGGCGGCGAGGCGGTTGCAGCAGCAGCGGCCTCTTATCGGGTGTTGAGTCGCTTACTGGGGTACGGCGGAGCAGAGTCAGCAGCCGCCGGCTTGGGGTTGAGCAGAGCTGTCGGAGAGACTGCCGCTATTGCAACTCGGGATCGCGGAAGGGCGGGCGGGTTGCGGGGTTCGCAGCTTCTGGTCTTCCGCCCTGGAGAAACCGGAGAGTCCTCGGCTGGGTCCCCAGTTGGCTGTCTGCCTCCTCCGCCACCGCCACTGCCTCAGCCACCCCCGTCGGAGCTCCTGTGCGCTAGGCATCGTTGTGCTCTCCTGGATGCTCCTAAGGGCGAACCAGGA…
RSAD01200140.1	Hydrophis_hardwickii	SOCS7	ATGCAACGGGCCGGAGGAGGAGCGGCCGCAGCAGCAGCAGAGCCCGGAGGAGGTGGTGACAACGGCGGCGAGGCGGTTGCAGCAGCAGCGGCCTCTTATCGGGTGTTGAGTCGCTTACTGGGGTACGGCGGAGCAGAGTCAGCAGCCGCCGGCTTGGGGTTGAGCAGAGCTGTCGGAGAGACTGCCGCTATTGCAACTCGGGATCGCGGAAGGGCGGGCGGGTTGCGGGGTTCGCAGCTTCTGGTCTTCCGCCCTGGAGAAACCGGAGAGTCCTCGGCTGGGTCCCCAGTTGGCTGTCTGCCTCCTCCGCCACCGCCACTGCCTCAGCCACCCCCGTCGGAGCTCCTGTGCGCTAGGCATCGTTGTGCTCTCCTGGATGCTCCTAAGGGCGAACCAGGA…
